# Supplementary material for: Elastography Study of Hamstring Behaviors during Passive Stretching
Source: PLoS One. 2015 Sep 29;10(9):e0139272. doi: 10.1371/journal.pone.0139272 (PMC4587804; doi:10.1371/journal.pone.0139272)
Supplement: S1 File — (HF-70: hip flexed at 70°, HF-90: hip flexed at 90°, HF-110: hip flexed at 110). (XLSX) [file pone.0139272.s001.xlsx]

## Sheet: HF_70
knee ROM (%)	knee ROM (°)	s1	s2	s3	s4	s5	s6	s8	s9	s10	s11	s12	s13	s14	s15	s16	s17	s18			ST	s1	s2	s3	s4	s5	s6	s8	s9	s10	s11	s12	s13	s14	s15	s16	s17	s18
0		110.146	110	110.228	109.249	109.148	109.525	110.1	110.145	110.101	109.952	110.261	109.959	109.764	108.936	109.853	109.727	110.035			shear modulus (kPa)	5.23186	3.2968	3.17056	8.20672	3.84659	3.51278	6.45316	7.19531	7.27486	6.29982	4.42098	3.68236	8.36015	3.48418	5.93084	4.15266	2.69172
2		109	108.7	109	107.9	107	108.2	108.6	108.409	108.872	108.715	109.046	108.772	108.321	107.162	108.563	108.709	108.681				5.61906	3.57324	3.20336	8.16877	3.60006	3.81293	6.45323	7.1903	7.27513	6.30183	4.728	4.07923	8.38448	3.48996	5.44579	4.329	2.67743
4		108	107.5	108	106.6	106	106.9	107.1	106.674	107.642	107.477	107.831	107.585	106.878	105.389	107.274	107.69	107.327				5.61063	3.92042	3.53905	7.6941	3.76053	4.03254	6.8368	7.73859	7.26747	6.10604	4.95904	4.47392	9.01602	3.81195	5.50875	4.54962	3.27183
6		107	106.2	107	105.2	104	105.5	105.7	104.939	106.413	106.24	106.616	106.398	105.435	103.615	105.985	106.672	105.973				5.41034	4.14886	3.53074	9.25631	3.69008	4.27391	7.33283	8.31461	7.40369	6.39245	5.46332	4.30182	9.6148	3.72024	6.17335	4.76193	3.12431
8		106	105	106	103.9	102	104.2	104.2	103.203	105.183	105.003	105.401	105.211	103.992	101.842	104.696	105.653	104.619				5.20853	4.40937	4.07623	9.0957	4.03011	4.33108	7.733	8.45599	7.52764	6.62503	5.6933	4.59794	9.54654	4.00753	5.9994	4.64495	3.52921
10		105	103.7	105	102.5	100	102.9	102.7	101.468	103.954	103.765	104.187	104.024	102.549	100.068	103.406	104.635	103.265				5.12284	5.58823	4.49836	10.3793	4.23945	4.40932	8.16501	8.46117	7.39656	6.96372	5.965	4.92397	10.0285	4.40272	6.01687	4.80574	3.38312
12		104	102.5	103	101.2	98	101.5	101.3	99.7326	102.724	102.528	102.972	102.837	101.106	98.2946	102.117	103.616	101.911				5.05783	4.79115	4.02257	10.5564	4.32604	4.63879	8.07657	8.3423	7.54882	6.94096	6.14704	4.78637	9.85218	4.23712	6.23826	5.07349	3.7278
14		103	101.2	102	99.9	97	100.2	99.8	97.9972	101.495	101.29	101.757	101.65	99.6635	96.521	100.828	102.598	100.558				5.84034	5.3102	4.22485	10.3295	4.42036	4.82915	8.27051	8.56771	7.08628	7.19447	6.23149	5.07196	10.3399	4.39691	5.85929	5.02704	3.90876
16		102	100	101	98.5	95	98.9	98.3	96.2619	100.265	100.053	100.542	100.463	98.2206	94.7475	99.5385	101.579	99.2037				5.16433	4.90132	4.45686	9.76578	4.34608	5.03804	8.53473	8.62124	7.07647	7.63433	6.49089	4.83012	9.79782	4.14112	6.57152	5.44165	3.9656
18		101	98.7	100	97.2	93	97.5	96.9	94.5265	99.0355	98.8157	99.3269	99.2757	96.7777	92.9739	98.2492	100.561	97.8498				5.3978	4.56	4.97558	11.2113	4.352	5.05293	9.11588	8.78485	7.22421	7.89299	6.72029	4.98194	9.92407	4.27681	6.51167	5.55931	3.71508
20		100	97.4	99	95.8	91	96.2	95.4	92.7912	97.806	97.5783	98.112	98.0887	95.3348	91.2004	96.9599	99.5421	96.4959				5.36457	5.77935	4.73476	11.8063	4.53461	5.2964	9.66522	8.529	7.61259	8.06092	6.86798	4.99819	10.3913	4.0518	6.44429	6.12728	4.27873
22		99	96.2	98	94.5	89	94.9	93.9	91.0558	96.5765	96.3409	96.8971	96.9017	93.8919	89.4268	95.6707	98.5236	95.1421				6.15562	6.02344	5.4047	9.75624	4.4938	5.53281	10.229	8.96601	7.53566	8.31258	7.59612	5.24911	10.9083	4.56072	5.70683	6.14599	4.50725
24		98	94.9	97	93.2	88	93.5	92.4	89.3205	95.347	95.1035	95.6822	95.7147	92.449	87.6533	94.3814	97.5051	93.7882				5.95554	6.47677	5.43134	10.8068	4.98377	5.84127	10.8453	9.2258	6.97516	9.05189	7.94752	5.39484	10.6395	5.0987	6.09152	5.99269	4.20392
26		97	93.7	95	91.8	86	92.2	91	87.5851	94.1175	93.8661	94.4673	94.5276	91.0061	85.8797	93.0921	96.4865	92.4344				6.48094	5.81306	7.34198	10.7029	5.129	6.03949	11.6881	9.41106	7.27387	9.83108	7.59232	5.47223	11.5156	5.20039	7.22325	5.96785	4.63449
28		96	92.4	94	90.5	84	90.9	89.5	85.8498	92.888	92.6287	93.2524	93.3406	89.5632	84.1061	91.8029	95.468	91.0805				6.22562	6.84	7.89903	11.9786	5.29801	6.24085	12.3891	10.0231	8.65972	9.04933	7.83015	5.74935	11.5645	5.19908	6.39992	6.31032	4.66418
30		95	91.2	93	89.1	82	89.5	88	84.1144	91.6584	91.3913	92.0375	92.1536	88.1203	82.3326	90.5136	94.4495	89.7267				6.04302	8.07084	6.54638	12.8454	5.8765	6.57086	12.94	10.055	8.69276	9.28184	8.15123	5.82448	11.4422	5.55533	6.55525	6.8267	5.14331
32		94	89.9	92	87.8	80	88.2	86.6	82.3791	90.4289	90.1539	90.8225	90.9666	86.6774	80.559	89.2243	93.431	88.3728				6.35034	7.58211	6.23566	13.1888	5.8838	6.84606	14.0738	10.4428	9.14091	9.642	8.23154	6.07002	11.8168	5.63655	6.41344	6.71895	5.02107
34		93	88.7	91	86.4	79	86.8	85.1	80.6437	89.1994	88.9165	89.6076	89.7796	85.2345	78.7855	87.9351	92.4124	87.0189				6.59647	9.72358	6.97846	13.1392	5.86481	7.07269	15.1078	10.5338	9.46054	9.82177	8.45766	6.0348	12.0524	6.07388	6.1128	7.03191	5.11503
36		92	87.4	90	85.1	77	85.5	83.6	78.9084	87.9699	87.6791	88.3927	88.5926	83.7916	77.0119	86.6458	91.3939	85.6651				6.87102	9.00357	7.7434	12.3564	6.12855	7.3343	15.5517	10.8127	9.88273	10.1191	8.7638	6.52329	12.3211	6.26643	5.73187	7.05628	5.20108
38		91	86.1	89	83.8	75	84.2	82.2	77.173	86.7404	86.4417	87.1778	87.4056	82.3487	75.2384	85.3565	90.3754	84.3112				7.65626	8.80481	8.57284	13.8249	6.32521	7.53679	17.139	11.4101	10.0247	9.91028	8.64748	6.48095	12.6784	6.83407	5.78652	7.65875	5.29674
40		89	84.9	87	82.4	73	82.8	80.7	75.4377	85.5108	85.2043	85.9629	86.2186	80.9058	73.4648	84.0673	89.3569	82.9574				8.48729	9.79037	9.11599	12.0942	6.72927	7.67879	17.8434	11.3057	10.349	10.0994	9.16228	6.91887	13.3266	6.5052	6.19819	7.91625	5.33883
42		88	83.6	86	81.1	72	81.5	79.2	73.7023	84.2813	83.9669	84.748	85.0316	79.4629	71.6913	82.778	88.3383	81.6035				7.37362	10.0468	9.24225	14.6975	6.88519	8.04981	18.6234	11.1409	11.5305	10.8466	9.22719	7.26881	13.6896	6.9547	6.40484	8.33002	5.74735
44		87	82.4	85	79.7	70	80.2	77.8	71.967	83.0518	82.7295	83.5331	83.8446	78.02	69.9177	81.4887	87.3198	80.2497				7.91324	9.11128	9.32294	15.6845	7.27245	8.65381	19.2138	11.4352	11.0807	11.5691	10.0712	7.34553	14.16	7.20516	7.0809	8.44614	5.84694
46		86	81.1	84	78.4	68	78.8	76.3	70.2316	81.8223	81.4921	82.3182	82.6576	76.5771	68.1442	80.1995	86.3013	78.8958				8.06115	9.66531	9.45638	16.0724	7.19115	9.11157	20.0617	11.5254	11.7951	12.418	10.607	7.40779	14.7791	7.58575	7.20914	8.48356	6.32568
48		85	79.9	83	77.1	66	77.5	74.8	68.4963	80.5928	80.2547	81.1032	81.4706	75.1342	66.3706	78.9102	85.2827	77.5419				8.5318	11.9287	9.43907	16.3082	7.45228	9.49097	21.3405	11.7187	12.3232	11.6778	10.7614	8.14568	15.8092	7.83128	7.50549	8.63061	6.27255
50		84	78.6	82	75.7	64	76.2	73.3	66.7609	79.3633	79.0173	79.8883	80.2836	73.6913	64.597	77.6209	84.2642	76.1881				9.36523	12.521	10.634	16.5157	7.74833	9.55698	22.9927	12.3629	13.6054	12.3929	11.237	8.47102	16.5111	8.19653	7.49114	9.06616	6.62548
52		83	77.4	81	74.4	63	74.8	71.9	65.0256	78.1337	77.7799	78.6734	79.0966	72.2484	62.8235	76.3317	83.2457	74.8342				9.40614	11.9506	11.0149	17.2495	7.94527	9.63636	23.9157	12.7907	14.4217	12.4069	11.7295	9.02847	16.7906	8.53571	7.37025	9.10966	6.80835
54		82	76.1	79	73	61	73.5	70.4	63.2902	76.9042	76.5425	77.4585	77.9096	70.8055	61.0499	75.0424	82.2272	73.4804				9.39769	12.9995	11.79	16.4849	8.03399	9.96347	24.4779	13.0224	15.865	13.1175	11.7253	8.89299	17.7216	8.7495	7.95263	9.60839	7.20815
56		81	74.8	78	71.7	59	72.2	68.9	61.5549	75.6747	75.3051	76.2436	76.7226	69.3626	59.2764	73.7531	81.2086	72.1265				9.96174	13.3595	11.5844	15.674	8.34057	10.348	24.8835	13.8415	16.2217	13.2721	12.0735	9.75485	18.313	9.35513	8.14866	9.52019	7.76148
58		80	73.6	77	70.4	57	70.8	67.5	59.8195	74.4452	74.0677	75.0287	75.5356	67.9197	57.5028	72.4639	80.1901	70.7727				11.0865	13.3592	12.4669	16.811	8.86788	10.6551	25.45	13.8255	16.719	13.6114	12.3063	9.76998	19.3449	9.92895	8.3482	10.6534	7.97254
60		79	72.3	76	69	55	69.5	66	58.0842	73.2157	72.8303	73.8138	74.3485	66.4768	55.7293	71.1746	79.1716	69.4188				11.1443	13.8215	12.4172	16.5911	9.34964	11.122	26.8786	13.8522	17.4734	14.2877	12.7895	10.1645	20.3262	10.0475	8.70129	10.4066	8.07633
62		78	71.1	75	67.7	54	68.2	64.5	56.3488	71.9861	71.5929	72.5989	73.1615	65.0339	53.9557	69.8853	78.1531	68.0649				11.743	15.3756	13.2372	19.3081	9.53133	11.7617	29.2272	14.501	19.1649	14.7153	13.4366	10.8678	21.2882	10.5672	9.39329	10.4528	8.21382
64		77	69.8	74	66.3	52	66.8	63.1	54.6135	70.7566	70.3555	71.3839	71.9745	63.591	52.1822	68.5961	77.1345	66.7111				12.5815	14.5096	13.5645	17.6623	9.763	12.2888	30.2629	14.2002	19.3816	16.2507	13.6182	11.3502	22.3606	10.782	10.0303	10.5857	8.89726
66		76	68.6	73	65	50	65.5	61.6	52.8781	69.5271	69.1181	70.169	70.7875	62.1481	50.4086	67.3068	76.116	65.3572				13.1299	15.3913	14.9883	19.8294	9.77902	12.6578	30.5469	14.5526	20.5186	17.107	14.1127	11.6982	23.2362	10.5727	10.2293	11.1843	9.58142
68		75	67.3	71	63.6	48	64.2	60.1	51.1428	68.2976	67.8807	68.9541	69.6005	60.7052	48.6351	66.0175	75.0975	64.0034				13.8684	16.0344	15.2696	19.8551	10.2236	13.0384	30.5816	15.4209	21.6787	17.7804	14.4056	12.2601	24.7808	11.2314	10.1893	11.644	9.54052
70		74	66.1	70	62.3	46	62.8	58.7	49.4074	67.0681	66.6433	67.7392	68.4135	59.2623	46.8615	64.7283	74.079	62.6495				14.4087	18.3911	16.5939	19.7284	10.6043	13.5761	31.7557	16.4612	22.6164	18.4342	15.1317	12.9123	26.2909	11.9866	11.0658	12.3188	9.78614
72		73	64.8	69	61	45	61.5	57.2	47.6721	65.8386	65.4059	66.5243	67.2265	57.8194	45.0879	63.439	73.0604	61.2957				15.8913	17.5826	17.8896	18.3351	11.5777	13.9654	32.8103	17.4996	25.1137	19.2148	15.6814	13.4042	28.1992	12.1513	11.285	12.7135	10.2216
74		72	63.5	68	59.6	43	60.2	55.7	45.9367	64.609	64.1685	65.3094	66.0395	56.3765	43.3144	62.1497	72.0419	59.9418				16.1433	17.6864	17.8246	20.3023	12.3568	14.5605	34.5059	18.541	25.4293	19.799	16.3722	13.8873	30.044	13.1082	11.7681	12.5234	10.9405
76		71	62.3	67	58.3	41	58.8	54.2	44.2014	63.3795	62.9311	64.0945	64.8525	54.9336	41.5408	60.8605	71.0234	58.5879				17.3747	19.0227	19.3221	19.1134	12.4351	15.0388	34.8458	18.3581	27.3568	21.7293	17.0784	14.5492	31.6132	12.9035	11.9672	13.5083	11.3771
78		70	61	66	56.9	39	57.5	52.8	42.466	62.15	61.6937	62.8796	63.6655	53.4907	39.7673	59.5712	70.0049	57.2341				19.4488	18.5346	19.0751	20.4089	13.1414	15.5379	35.7644	19.4591	29.2238	23.0972	17.6348	15.7083	32.5014	13.5866	13.3731	14.2803	11.989
80		69	59.8	65	55.6	37	56.2	51.3	40.7307	60.9205	60.4563	61.6647	62.4785	52.0478	37.9937	58.2819	68.9863	55.8802				18.2697	21.9894	20.2265	23.8731	13.4208	16.2609	36.6067	19.8002	31.6129	24.1923	18.1274	16.0463	37.412	14.5258	14.8244	15.2001	12.4872
82		68	58.5	63	54.3	36	54.8	49.8	38.9954	59.691	59.2189	60.4497	61.2915	50.6049	36.2202	56.9927	67.9678	54.5264				19.104	22.2395	18.6484	19.9073	13.9309	16.5787	37.4958	20.4623	33.0855	24.7445	19.6042	17.0481	40.5406	15.3342	14.8255	15.299	13.4459
84		67	57.3	62	52.9	34	53.5	48.4	37.26	58.4614	57.9815	59.2348	60.1045	49.162	34.4466	55.7034	66.9493	53.1725				19.7004	20.1936	20.63	21.5571	14.5898	17.3508	37.9231	21.1974	34.857	26.4225	19.896	18.16	43.5215	15.3881	16.3938	16.0832	13.7051
86		66	56	61	51.6	32	52.2	46.9	35.5247	57.2319	56.7441	58.0199	58.9175	47.7191	32.6731	54.4141	65.9308	51.8186				21.7504	22.419	21.547	23.9625	15.1601	17.8146	39.8058	21.935	38.9342	26.3004	20.9914	19.457	42.5504	15.9554	15.6367	17.0072	14.4838
88		65	54.8	60	50.2	30	50.8	45.4	33.7893	56.0024	55.5067	56.805	57.7305	46.2762	30.8995	53.1249	64.9122	50.4648				20.7301	20.3707	20.7676	23.7719	15.2483	18.1543	42.1097	23.4932	35.4434	27.7651	22.3512	20.2597	45.9631	16.1035	16.5733	17.1776	15.2313
90		64	53.5	59	48.9	28	49.5	44	32.054	54.7729	54.2693	55.5901	56.5435	44.8333	29.126	51.8356	63.8937	49.1109				22.7555	23.7539	21.7631	21.6428	15.7202	18.5934	43.5866	23.8462	39.8942	30.3709	22.0071	22.2555	49.1035	16.6979	19.4745	17.9559	15.9208
92		63	52.2	58	47.5	27	48.2	42.5	30.3186	53.5434	53.0319	54.3752	55.3565	43.3904	27.3524	50.5463	62.8752	47.7571				22.4177	25.9162	27.0677	21.6395	16.0807	19.4184	43.7072	24.6047	42.3513	31.4053	23.1083	22.6117	47.3195	17.1737	19.3034	18.7056	16.8311
94		62	51	57	46.2	25	46.8	41	28.5833	52.3139	51.7945	53.1603	54.1694	41.9475	25.5788	49.2571	61.8567	46.4032				24.2198	25.3683	25.3988	23.8479	16.5036	20.1878	43.6305	24.9165	45.6585	33.7693	23.5919	23.3084	51.207	19.1278	20.2311	19.1273	17.5894
96		61	49.7	55	44.9	23	45.5	39.5	26.8479	51.0843	50.5571	51.9454	52.9824	40.5046	23.8053	47.9678	60.8381	45.0494				24.0673	23.7531	27.0527	24.4914	17.5591	20.9573	44.1633	27.3808	47.92	37.6028	24.0717	25.1359	52.0451	19.5711	22.0607	20.1204	18.2822
98		59	48.5	54	43.5	21	44.2	38.1	25.1126	49.8548	49.3197	50.7304	51.7954	39.0617	22.0317	46.6785	59.8196	43.6955				25.7189	24.0974	27.225	24.4721	18.0203	21.8803	45.3658	28.4537	51.7021	39.9621	25.0137	25.2517	54.9713	20.6423	23.4183	21.4582	19.0486
100		58	47.2	53	42.2	20	42.8	36.6	23.3772	48.6253	48.0823	49.5155	50.6084	37.6188	20.2582	45.3892	58.8011	42.3416				25.934	24.7552	26.1823	25.3259	18.13	22.1114	47.4208	28.3381	51.0317	42.0326	25.844	27.7459	54.7142	25.193	28.1259	22.1956	20.1118
																					SM	s1	s2	s3	s4	s5	s6	s8	s9	s10	s11	s12	s13	s14	s15	s16	s17	s18
																					shear modulus (kPa)	6.63782	5.81793	6.07132	7.17389	5.03599	6.03838	11.7662	11.6954	6.89324	6.30879	8.17455	5.15321	6.67502	4.52228	4.09183	6.71555	6.38046
																						6.44214	5.91134	5.96949	7.33145	5.04699	6.03871	11.5784	11.7535	7.12533	6.30376	8.72855	5.71095	6.92266	3.89665	4.82872	6.29418	6.50359
																						6.48349	6.2804	6.11248	6.64073	4.90237	6.02282	12.0413	13.1249	6.23765	6.6274	9.58583	6.0935	6.82763	3.95532	5.31174	6.8978	6.87006
																						7.15675	6.77074	6.52754	10.1119	5.14254	5.97564	12.3637	13.6155	7.29502	6.77372	9.89475	6.21526	6.52973	4.43665	5.41757	6.81142	6.3306
																						7.47688	7.39614	5.7077	6.20711	5.57415	6.22166	12.8108	13.2864	7.66485	6.62939	10.3759	6.42357	6.42525	4.70096	4.65667	6.3783	7.20367
																						6.85033	6.88468	6.47348	5.27927	5.39912	6.46393	12.2135	12.1732	7.59383	6.61367	10.571	6.45469	6.82905	4.52071	4.83099	6.45983	7.4308
																						6.44793	7.34841	6.35257	5.58942	5.5313	6.62928	11.5744	12.5164	7.66586	7.0402	10.555	6.5148	7.53788	4.50949	5.25338	7.13385	7.32329
																						7.12152	7.77939	6.4292	4.89792	5.50341	6.56278	11.6912	12.486	7.59754	6.99778	10.5502	6.54969	7.33177	4.88536	5.71656	6.89187	8.50675
																						6.86413	7.57566	6.51578	6.25316	5.38693	6.50754	11.5849	12.3919	7.95948	6.73379	10.6737	6.9403	7.81068	4.69648	6.05157	7.43636	7.82174
																						7.14157	8.07962	6.86806	5.64956	5.32325	6.37164	12.7769	12.6711	8.34773	7.00825	10.9692	6.9252	7.65498	4.78676	6.80965	7.76053	7.28718
																						7.09493	7.64377	6.83599	5.32733	5.67916	6.18259	11.1301	12.5737	8.52249	7.18072	10.8274	7.2069	8.31906	5.10123	7.05635	8.00797	7.71345
																						7.63166	8.21562	6.89763	6.6947	5.55301	6.09949	11.2194	12.2848	8.79453	6.98085	10.9402	7.05209	8.50187	4.96764	7.49312	8.07032	8.83309
																						7.61943	8.56128	7.4197	5.81094	5.80945	6.21121	11.1441	12.8154	8.66329	7.37577	11.1107	7.01282	8.68537	5.34498	7.49549	8.5968	8.90173
																						7.8751	9.63261	7.71141	5.45585	5.94658	6.41931	11.5121	12.5547	8.41728	7.48454	11.575	7.28833	8.72091	5.69199	7.10916	8.39049	8.34732
																						8.15869	9.91457	7.97094	5.80029	6.29602	6.56968	12.2061	12.9336	9.33187	7.74365	11.4975	7.24498	9.14004	6.06931	7.6435	9.4783	8.60801
																						8.18764	9.95344	8.12849	6.09629	6.39561	6.7655	12.5837	13.1391	9.93725	7.71215	11.7916	7.62539	10.0414	6.29456	8.0839	9.10384	7.93119
																						7.9228	10.7821	8.53334	6.10994	6.44608	6.82443	12.5704	13.5755	9.77292	8.20011	12	8.05322	10.38	6.34745	8.52478	9.55362	7.95407
																						8.53812	11.5972	8.9962	7.01655	6.69622	7.0645	13.5524	13.6629	10.2259	8.60682	12.1888	8.21667	11.1936	6.62601	9.61614	9.28119	8.9593
																						9.30244	12.1527	9.16964	6.43796	7.00547	7.28173	12.8984	13.3368	10.4829	8.98747	12.6125	8.56071	11.7224	6.99884	9.7229	9.51124	8.30765
																						10.3239	12.8658	9.67602	7.27808	7.18273	7.81726	14.1236	13.4544	11.1513	9.12039	12.9734	8.70397	12.5519	7.28443	9.29142	10.7186	8.05046
																						9.82545	13.8397	9.49577	6.00894	7.2508	8.32235	14.2542	13.7974	11.3778	9.90564	13.1449	9.04804	11.88	7.75173	9.30143	10.2133	9.51412
																						10.3848	12.3821	10.1409	7.53652	7.8304	8.665	15.1346	14.0478	11.8925	10.3774	13.7684	9.27266	12.7675	8.24441	9.70959	11.0492	9.00406
																						10.4605	11.9565	10.5357	8.09803	8.09725	8.92214	15.6889	14.0641	12.029	10.5445	13.6724	9.68583	13.3693	8.31053	10.726	10.2881	9.90196
																						11.1673	13.1122	11.3176	8.10176	8.4637	9.16922	16.7534	14.6605	13.397	10.7676	14.3419	10.0257	13.8382	8.67549	10.4878	12.0663	10.4309
																						11.4795	14.2417	11.1533	8.45521	8.84232	9.71193	17.684	14.8393	14.4658	10.8114	14.3597	10.5537	13.8768	8.87874	10.5355	11.5843	11.4715
																						11.711	14.6621	12.3391	8.33298	9.47026	10.3737	17.7074	14.147	14.3815	11.6087	15.2217	11.048	13.721	9.11084	11.2751	11.8605	11.4989
																						12.1915	15.6431	12.0796	8.25369	9.21034	10.8877	19.4939	14.9644	16.3335	11.324	15.3186	11.3408	14.5412	10.2172	10.8496	13.2707	10.639
																						12.926	17.3267	12.4203	8.47518	10.1197	11.1477	19.8457	15.4927	16.5361	11.7263	16.0316	11.5129	16.2239	9.92718	11.7838	13.6137	11.5963
																						13.5559	17.5853	14.0195	11.4106	10.6281	11.4158	20.7864	16.0903	16.7235	12.163	15.9545	11.8111	17.5217	10.1069	11.2882	12.8272	11.563
																						14.4895	17.6221	14.1992	13.473	10.8446	11.6372	20.7913	16.5176	17.5897	12.7324	16.2654	12.3748	18.9845	10.9616	11.8162	13.433	13.1551
																						15.4979	17.2536	14.9276	13.7388	11.4447	12.28	22.8079	17.0397	19.1578	13.3469	17.0816	13.2605	20.5666	10.6908	12.2807	13.847	13.3419
																						16.5206	18.0688	16.0602	14.9934	11.574	13.0416	23.3504	17.2656	19.4983	13.7951	17.7436	14.0948	21.4276	10.9142	12.8329	15.12	13.9129
																						17.387	19.0004	17.392	15.916	12.4008	13.8564	22.9283	18.3035	20.6275	14.3797	18.4728	14.3613	20.5196	11.1706	12.9608	15.8008	14.1336
																						18.3593	20.4675	18.8642	17.2458	13.535	14.7817	23.2614	19.1512	22.9943	15.2084	19.4771	14.7031	22.4122	11.4091	13.1313	16.4883	14.1977
																						19.2086	21.1881	19.7577	18.9052	13.5029	15.7246	24.1767	19.9945	24.7335	16.5421	20.3958	15.773	23.4228	11.9112	14.4546	16.1393	16.309
																						21.0319	20.5726	21.3258	21.6376	14.1849	16.7851	24.581	20.1635	25.5831	17.2279	21.1665	16.006	23.4228	12.254	16.239	16.3887	16.7611
																						21.0273	20.8649	22.9526	23.0645	15.2124	17.3779	25.5786	21.0911	26.9566	17.4288	22.1036	16.8755	24.4071	13.2183	15.6039	17.8994	16.7875
																						23.4083	23.3622	24.6712	23.8163	15.7708	18.3092	27.1534	22.0453	29.7571	17.8208	23.5864	18.1446	24.5852	13.803	15.0294	18.7603	18.6375
																						24.4371	23.0691	25.4129	25.4675	16.6691	19.2782	28.7722	23.3381	30.2507	19.2046	24.1803	19.4299	25.8478	14.2588	16.0506	18.6932	18.2448
																						26.1481	24.7029	25.5027	27.9545	17.7464	20.0051	28.8261	23.9348	32.2141	19.7867	24.5726	20.2402	27.7825	15.5306	15.2687	19.9978	21.0256
																						27.9367	26.3586	26.8166	30.4417	18.2664	20.7496	30.7225	26.2702	32.7381	20.7864	25.269	21.5169	29.8498	16.1767	16.3719	20.1676	22.9035
																						28.8724	25.845	29.3265	34.442	18.5974	21.2557	31.6676	27.3386	35.7213	21.772	25.9526	23.412	31.9822	17.3529	17.1526	21.5172	23.5988
																						28.8055	27.7086	31.9469	35.2161	19.0852	22.2751	34.0794	28.4712	37.1474	22.8337	27.4495	24.226	32.7857	18.5303	19.7535	21.4366	23.6802
																						30.4678	29.9278	32.2868	35.6864	20.6251	22.8124	33.4383	29.1455	40.1517	24.9953	28.6688	25.5845	33.3743	18.8203	21.4317	21.4704	24.0228
																						32.4014	29.938	33.2258	35.7792	21.8363	23.5844	35.4746	30.6451	40.2066	25.4744	30.6366	27.0443	35.3677	19.8702	21.628	23.4206	24.0919
																						33.2018	31.5327	38.6853	35.7004	22.6968	24.1376	38.1134	33.2391	41.4202	27.9296	31.9532	28.8526	38.0818	21.3414	24.2281	24.1825	24.041
																						36.2215	31.4904	38.1607	35.0433	24.1248	24.3886	37.6017	34.9152	44.9447	30.6689	34.3199	31.3257	39.921	21.6976	25.7891	26.3587	25.9484
																						38.9797	32.7708	38.3707	36.5259	25.1859	25.2928	41.0064	37.2414	46.4333	31.2542	36.4804	33.9561	40.8193	22.8069	27.3369	27.6049	27.537
																						42.0145	34.3746	38.5461	37.6011	25.1911	25.2993	42.9186	38.1205	51.8663	36.0834	38.3399	36.6097	45.7892	23.7615	27.4424	29.5135	26.9362
																						45.2343	34.3274	39.5836	37.0419	26.389	25.0219	46.3898	39.6201	52.7371	37.1428	40.9881	39.7044	46.9371	23.5472	25.9957	29.8525	27.3875
																						49.2188	34.2478	40.7219	38.8081	26.8531	24.9578	47.45	42.3237	55.3008	45.4005	43.2252	43.7996	49.5483	23.9829	27.3572	31.3852	26.4017
																					BF-lh	s1	s2	s3	s4	s5	s6	s8	s9	s10	s11	s12	s13	s14	s15	s16	s17	s18
																					shear modulus (kPa)	4.92787	7.31794	3.08733	5.33643	3.55099	7.71322	9.56557	9.56622	7.75655	7.52257	14.4194	8.44545	5.6802	4.14772	3.04654	6.61514	4.23553
																						4.83499	7.5896	3.85382	5.32846	3.89512	7.72277	9.66296	8.5686	7.63664	6.92751	13.9574	8.44428	5.62172	5.21363	2.96787	7.63965	4.89192
																						5.13004	6.86647	4.04371	5.18513	3.92368	8.00073	9.81078	7.24049	7.45838	7.60227	13.5936	7.92339	6.12278	4.63779	2.82043	7.92699	5.43017
																						5.82935	7.11916	4.20153	5.59132	4.60095	8.25202	10.3785	7.3854	7.62542	7.77259	13.5801	7.97228	6.7407	4.62509	2.9231	7.82953	5.71138
																						5.71584	6.60732	3.9814	6.01922	5.28632	8.40354	10.8152	7.55137	8.03074	7.8154	13.315	7.98445	7.02945	4.97443	3.1863	8.44436	5.30753
																						6.31311	7.28722	3.96709	5.31051	3.82343	8.4876	11.5741	7.97847	8.21207	7.46583	13.7032	8.22038	7.31775	5.07517	3.4314	7.72399	5.9462
																						5.04712	7.61201	6.28957	5.27332	4.79792	8.46407	11.8552	8.02475	8.71935	7.72612	14.0044	8.47025	6.6179	5.59441	3.55726	8.67264	5.54107
																						5.52661	7.72178	5.02749	6.3268	3.65339	8.58624	12.0546	8.83934	8.82872	7.95208	13.8576	8.83707	7.02072	4.73765	3.79056	7.84689	5.56209
																						5.70672	8.05312	5.23682	5.32466	4.46882	8.74988	12.3066	8.74128	9.13982	7.84789	13.6146	9.35652	7.28767	5.7145	3.80328	7.91817	5.77113
																						5.6501	7.61556	6.23901	5.53277	4.21472	8.87629	12.3849	9.39859	9.44396	8.67185	13.9282	10.0257	7.24656	5.23451	3.72763	8.1899	5.8679
																						5.8362	7.6061	6.10728	6.23223	5.33503	9.0972	12.6298	9.62602	9.63288	7.9366	13.8509	11.1145	7.51086	5.23544	3.60069	8.56437	6.16492
																						6.11353	8.18484	7.32471	5.8511	5.22037	9.29633	12.4385	9.7272	10.5353	8.76777	13.4568	10.491	7.74154	6.05555	3.67391	9.5289	5.96427
																						6.45394	8.11677	7.40671	5.57185	5.51188	9.52114	12.1172	10.2791	11.0496	8.48489	13.5992	10.7228	7.93004	5.53527	3.99434	9.16534	6.23932
																						6.44955	7.78582	6.80733	5.94206	6.49	9.61467	12.0806	10.2519	11.5305	9.22147	13.6247	11.4434	8.29596	5.38035	3.87756	9.08017	6.28055
																						6.56508	8.16617	7.89003	6.47568	6.4467	9.66613	12.1762	10.0094	12.1621	8.73466	13.5297	11.6121	8.69854	5.57141	3.91765	9.10479	6.378
																						6.45169	7.98785	9.58553	6.92853	7.22505	9.83263	12.8732	10.9815	12.8063	9.46175	13.8635	11.5581	8.77627	5.94652	4.29111	9.60149	6.79434
																						7.41211	7.69616	6.68386	7.48586	7.60593	10.1018	13.1332	10.633	14.0307	9.38103	13.9479	11.8025	9.1458	6.31155	4.23515	9.44369	7.06687
																						7.25017	8.62723	7.61012	7.26127	8.49449	10.2772	13.5763	11.3271	14.9543	9.33535	13.8425	12.1228	9.48242	6.38996	4.68388	10.0218	7.27578
																						7.91407	8.95945	7.86581	7.46311	9.34684	10.4364	13.7694	11.3559	15.7657	9.50667	14.7987	13.2011	10.2056	6.93429	5.06528	10.1072	7.33913
																						7.70438	9.2897	8.85045	8.50607	9.02323	10.647	14.0561	11.5252	16.0124	9.47735	14.6505	13.093	10.7761	6.49825	5.37792	10.2157	7.75165
																						7.97765	10.3105	9.84725	7.72838	8.48651	10.8906	14.2726	12.4766	16.8121	9.58495	15.2376	13.4837	11.0221	6.47055	5.64488	10.4644	8.00124
																						8.16494	9.97741	10.435	9.32056	9.32499	11.1065	14.5711	12.0957	17.389	10.2432	15.3095	13.2064	10.7879	6.81092	5.82708	10.9292	8.26029
																						8.75656	10.787	10.9116	8.55263	8.66143	11.283	14.8466	12.0423	18.3357	10.8846	16.1541	13.437	11.2079	7.32614	5.88271	11.2633	8.59835
																						9.11857	11.377	11.6381	8.78911	9.02682	11.52	14.9039	12.8386	20.0139	10.7686	16.8124	13.7471	11.5806	7.39171	6.25886	12.2086	9.00097
																						9.65199	11.7475	11.2654	9.51163	9.42552	11.9506	15.3135	13.5386	20.8331	11.0038	17.7591	14.2709	12.3578	7.37103	6.7436	12.008	9.59932
																						9.23416	12.3605	11.3655	9.89812	9.45772	12.286	15.4377	13.9734	22.0675	10.9479	18.7526	14.0281	12.95	7.83025	7.32294	12.4099	9.91412
																						9.35037	12.5804	11.7812	10.6223	9.76402	12.6869	16.0849	14.4995	22.2671	11.4706	19.1441	14.4872	13.2753	8.1579	7.37861	12.7626	10.8017
																						9.78649	13.2617	12.9178	10.5573	9.59706	13.0119	16.6101	14.7028	22.5088	11.3521	19.9717	14.6496	13.8552	8.17275	7.89464	12.7341	10.9719
																						9.87716	14.7563	14.0445	11.7726	9.88866	13.2128	17.181	14.9805	23.7843	12.0775	20.6371	15.9851	14.7537	8.35392	8.51621	13.7238	10.8228
																						9.86154	16.3434	13.2582	10.9953	10.69	13.6193	17.6133	16.0512	24.8895	13.085	20.9783	16.0211	16.3538	8.41303	8.90989	13.9345	11.2477
																						10.6367	16.0077	13.4369	12.6202	11.2959	14.1086	18.017	16.2837	25.634	13.6628	22.1103	17.4822	16.1468	8.99074	9.06546	14.6127	11.4473
																						10.5787	16.647	14.4789	12.3967	11.1657	14.7025	18.5756	17.4621	25.8282	15.0669	23.5304	18.5012	17.2497	9.55291	9.87068	14.257	12.48
																						11.5333	17.9084	15.7373	14.56	12.7277	15.1019	19.4532	18.3251	27.248	14.0172	23.9182	19.1168	17.4598	9.52875	9.65421	14.4871	12.9099
																						11.2956	18.6397	16.4628	16.0471	12.5786	15.6103	20.4622	19.5271	28.4362	14.9334	25.7219	20.6834	17.7909	9.86761	10.3679	14.9237	13.5409
																						12.3033	19.3161	16.9179	18.3997	12.9349	16.1742	21.8493	18.952	30.2216	15.7277	26.8901	20.6042	20.3728	10.6415	10.8798	15.8032	14.5162
																						12.6659	19.8877	17.2597	19.3834	13.498	16.9716	22.8815	20.6324	31.598	16.1827	26.8211	22.1221	20.181	11.323	11.6349	16.6385	15.0396
																						14.1362	20.3473	16.7972	20.8426	13.5847	17.6236	23.6726	21.2134	32.829	16.1086	30.4314	23.2078	21.3849	11.8803	12.0921	16.9662	15.5835
																						14.0092	22.2913	16.9996	23.1413	14.7077	18.296	23.6335	21.7303	33.6023	16.9604	31.8492	23.207	22.5984	11.7841	12.5762	17.5733	15.7932
																						15.3123	23.2957	18.7926	25.9508	15.28	19.055	23.6627	23.312	35.1146	17.6892	32.0441	23.7452	22.7637	12.549	13.7871	17.8666	17.1547
																						15.5685	24.5303	18.0872	24.3372	17.0051	19.6315	24.062	24.1619	37.1961	18.6443	33.0555	25.2301	24.2557	12.2507	13.6267	18.5021	17.1967
																						16.2988	25.252	22.1833	25.0807	17.0886	20.5307	24.8726	24.4391	38.7741	20.458	36.4442	26.3206	26.1342	13.1104	14.5179	19.0221	18.3858
																						16.4706	26.4938	20.9858	25.8786	18.7415	21.4332	25.4891	24.6725	39.9805	22.3954	37.8618	27.0213	28.8734	13.7831	15.2354	19.7784	19.594
																						18.0577	27.715	23.0748	29.0752	18.7872	22.6135	25.7619	25.9229	40.8072	25.3775	38.6777	28.422	29.1349	15.0553	17.0879	20.2157	21.163
																						17.3016	28.8211	24.1491	28.1659	19.8096	23.6931	25.9236	26.1544	43.336	26.7032	40.02	30.192	31.9328	15.9924	17.5852	21.164	22.469
																						18.5446	29.8301	25.4913	27.5373	21.0068	24.5709	26.0594	27.0962	42.758	26.814	40.2415	30.3982	33.4636	16.3485	17.6267	21.3287	23.2037
																						20.8753	32.0376	26.4164	26.4874	22.9747	25.3102	26.2875	27.0671	42.5946	29.6122	41.3993	32.3172	34.6432	17.9911	19.8315	22.3949	25.1097
																						20.1405	32.7015	25.3933	27.3927	24.1002	25.9829	26.8997	28.6741	42.5078	30.5264	44.1865	33.9941	36.5875	17.7435	20.1761	23.4522	25.9119
																						21.1624	34.6195	28.5319	25.579	24.5687	26.8913	26.7171	28.2503	44.8268	34.6668	45.7119	35.3891	37.7806	19.085	21.3935	22.934	28.0026
																						21.5441	35.7545	28.9716	28.2699	26.4928	27.8248	26.4253	28.301	48.0875	39.5558	46.5252	37.0262	39.4919	19.7247	23.0597	23.99	29.4685
																						23.1804	36.8725	32.4237	25.3712	27.6532	28.6423	26.3925	29.7	48.6771	46.0611	46.6568	39.028	42.096	19.9785	25.5335	23.3118	30.6209
																						22.6963	38.9855	31.0853	26.4732	29.7428	29.2735	26.0498	30.207	49.4353	50.5765	47.6239	40.0645	42.9359	20.1801	25.8193	23.4538	30.7944

## Sheet: HF_90
knee ROM (%)	knee ROM (°)	s1	s2	s3	s4	s5	s6	s8	s9	s10	s11	s12	s13	s14	s15	s16	s17	s18			ST	s1	s2	s3	s4	s5	s6	s8	s9	s10	s11	s12	s13	s14	s15	s16	s17	s18
0		110.146	110	110.228	109.249	109.148	109.525	110.1	110.145	110.101	109.952	110.261	109.959	109.764	108.936	109.853	109.727	110.035			shear modulus (kPa)	11.387	5.57511	6.71102	12.9986	6.03992	7.56256	10.2185	11.2338	6.13384	7.26976	10.9274	8.1745	9.00284	6.18813	7.379	5.45446	5.03605
2		109	108.7	109	107.9	107	108.2	108.6	108.409	108.872	108.715	109.046	108.772	108.321	107.162	108.563	108.709	108.681				11.12	5.57586	6.71177	12.9982	6.04093	7.82182	10.3582	11.2339	6.07366	7.51413	10.9258	8.30042	9.00225	6.22828	7.52223	6.15567	5.33222
4		108	107.5	108	106.6	106	106.9	107.1	106.674	107.642	107.477	107.831	107.585	106.878	105.389	107.274	107.69	107.327				9.98574	5.65466	7.38333	12.1308	6.57546	8.08451	10.8837	11.4594	6.78719	8.21331	10.0771	8.81785	9.58196	6.57412	7.17469	6.37424	5.61036
6		107	106.2	107	105.2	104	105.5	105.7	104.939	106.413	106.24	106.616	106.398	105.435	103.615	105.985	106.672	105.973				11.0223	5.85568	7.59608	13.9418	7.2247	8.32943	11.0935	11.84	6.53481	8.22777	10.8219	8.90861	10.1587	6.38744	8.23848	6.69054	5.67822
8		106	105	106	103.9	102	104.2	104.2	103.203	105.183	105.003	105.401	105.211	103.992	101.842	104.696	105.653	104.619				12.8052	5.96597	10.0391	14.4848	7.34012	8.52144	10.9822	13.1681	7.12359	8.58244	10.1438	8.73556	10.5253	6.34857	7.41567	7.06586	5.67456
10		105	103.7	105	102.5	100	102.9	102.7	101.468	103.954	103.765	104.187	104.024	102.549	100.068	103.406	104.635	103.265				11.9142	6.14878	10.3022	13.5907	7.34028	8.61859	11.2914	13.2046	6.88766	8.54653	10.4355	9.10875	10.2925	6.64634	7.41401	7.34813	5.51556
12		104	102.5	103	101.2	98	101.5	101.3	99.7326	102.724	102.528	102.972	102.837	101.106	98.2946	102.117	103.616	101.911				14.0032	6.68064	10.9202	13.9644	7.56792	8.70549	11.8112	13.5962	7.44435	8.8222	10.5456	9.286	10.6454	7.10363	7.44667	7.70619	5.88896
14		103	101.2	102	99.9	97	100.2	99.8	97.9972	101.495	101.29	101.757	101.65	99.6635	96.521	100.828	102.598	100.558				14.6595	6.70826	13.2768	13.4654	7.32475	8.8155	12.0919	14.0671	7.5065	9.15734	10.5577	9.12687	10.8323	6.80574	8.14272	7.48611	5.88523
16		102	100	101	98.5	95	98.9	98.3	96.2619	100.265	100.053	100.542	100.463	98.2206	94.7475	99.5385	101.579	99.2037				15.9858	6.7532	12.3906	11.9657	7.39614	9.00722	12.4304	13.6412	7.81457	9.39103	10.0362	9.51511	11.3899	7.44995	7.10397	7.49444	6.1259
18		101	98.7	100	97.2	93	97.5	96.9	94.5265	99.0355	98.8157	99.3269	99.2757	96.7777	92.9739	98.2492	100.561	97.8498				16.8398	7.27947	12.9845	11.4149	7.40766	9.24518	12.9716	13.4253	8.07254	9.21203	10.4625	9.60361	11.8445	7.61182	7.01859	7.36431	6.73888
20		100	97.4	99	95.8	91	96.2	95.4	92.7912	97.806	97.5783	98.112	98.0887	95.3348	91.2004	96.9599	99.5421	96.4959				14.3618	7.26304	12.9156	10.7469	7.64621	9.57649	13.6575	12.4703	8.71147	9.71956	11.054	9.67849	12.1342	7.97672	8.20943	7.49752	7.63304
22		99	96.2	98	94.5	89	94.9	93.9	91.0558	96.5765	96.3409	96.8971	96.9017	93.8919	89.4268	95.6707	98.5236	95.1421				15.8104	7.27715	11.779	9.91585	7.73799	9.80743	13.8667	12.9332	9.01805	9.88206	10.7545	9.47657	11.7957	7.97752	8.76894	7.85045	7.54535
24		98	94.9	97	93.2	88	93.5	92.4	89.3205	95.347	95.1035	95.6822	95.7147	92.449	87.6533	94.3814	97.5051	93.7882				15.3278	8.50147	11.1229	11.1966	7.75762	10.0974	14.7522	13.0873	9.20335	9.92996	11.3052	9.65357	12.2952	8.1185	7.41319	8.04799	7.78497
26		97	93.7	95	91.8	86	92.2	91	87.5851	94.1175	93.8661	94.4673	94.5276	91.0061	85.8797	93.0921	96.4865	92.4344				16.6342	8.36391	10.9112	9.35822	8.10846	10.5287	15.4621	14.1807	9.2534	9.5301	11.8392	9.62123	12.525	9.19314	7.32876	8.24835	9.08061
28		96	92.4	94	90.5	84	90.9	89.5	85.8498	92.888	92.6287	93.2524	93.3406	89.5632	84.1061	91.8029	95.468	91.0805				16.2258	8.31179	11.2819	10.3962	8.19507	10.8746	16.0716	13.747	9.71259	10.2032	11.8879	9.88458	13.4344	8.94614	8.51907	8.39762	7.93873
30		95	91.2	93	89.1	82	89.5	88	84.1144	91.6584	91.3913	92.0375	92.1536	88.1203	82.3326	90.5136	94.4495	89.7267				18.8737	8.67769	11.0266	10.0972	8.13774	11.286	16.9689	13.3233	10.3796	10.3452	12.0058	10.0139	13.6832	9.25857	8.58824	8.48735	8.66879
32		94	89.9	92	87.8	80	88.2	86.6	82.3791	90.4289	90.1539	90.8225	90.9666	86.6774	80.559	89.2243	93.431	88.3728				16.4326	9.03444	12.8976	11.6556	8.11823	11.6524	17.9616	13.6052	10.1608	11.9687	12.1957	10.5995	14.0347	9.80692	8.93587	8.59461	9.32317
34		93	88.7	91	86.4	79	86.8	85.1	80.6437	89.1994	88.9165	89.6076	89.7796	85.2345	78.7855	87.9351	92.4124	87.0189				20.6535	9.42622	14.9914	11.4547	8.59574	11.8258	18.4343	13.7937	10.7679	11.1593	12.328	11.088	15.6539	10.0489	9.39152	8.81247	9.21343
36		92	87.4	90	85.1	77	85.5	83.6	78.9084	87.9699	87.6791	88.3927	88.5926	83.7916	77.0119	86.6458	91.3939	85.6651				18.4834	9.90866	15.9566	11.2243	8.88932	12.1124	19.0295	13.8662	11.5409	11.5655	12.5485	11.4415	15.6285	10.5433	10.4758	9.23069	9.99818
38		91	86.1	89	83.8	75	84.2	82.2	77.173	86.7404	86.4417	87.1778	87.4056	82.3487	75.2384	85.3565	90.3754	84.3112				18.0907	10.6602	16.1427	10.9847	9.3579	12.4669	19.2278	14.0585	11.5939	12.4395	13.4437	12.0478	16.3024	10.4754	10.0154	9.3057	10.6843
40		89	84.9	87	82.4	73	82.8	80.7	75.4377	85.5108	85.2043	85.9629	86.2186	80.9058	73.4648	84.0673	89.3569	82.9574				20.0655	11.0847	16.9767	12.2325	9.38452	12.7854	20.6162	15.0215	12.4993	12.8188	13.7458	12.0167	17.9907	11.011	10.2167	9.59613	11.0728
42		88	83.6	86	81.1	72	81.5	79.2	73.7023	84.2813	83.9669	84.748	85.0316	79.4629	71.6913	82.778	88.3383	81.6035				21.9805	11.611	15.4402	12.7196	9.91295	13.161	21.651	14.4978	13.2705	13.6187	14.6625	12.3974	17.9438	11.6599	10.3115	9.92132	11.4076
44		87	82.4	85	79.7	70	80.2	77.8	71.967	83.0518	82.7295	83.5331	83.8446	78.02	69.9177	81.4887	87.3198	80.2497				21.2384	12.1247	16.8785	12.4099	9.96208	13.5254	22.9354	15.3211	13.8633	15.0536	15.0666	12.9683	18.9747	11.874	10.3144	9.82514	11.171
46		86	81.1	84	78.4	68	78.8	76.3	70.2316	81.8223	81.4921	82.3182	82.6576	76.5771	68.1442	80.1995	86.3013	78.8958				21.9866	12.3173	16.514	12.6611	10.6589	13.8963	24.1408	15.4945	14.6431	15.7192	16.7641	13.0716	19.1631	12.364	11.3916	10.3315	11.9018
48		85	79.9	83	77.1	66	77.5	74.8	68.4963	80.5928	80.2547	81.1032	81.4706	75.1342	66.3706	78.9102	85.2827	77.5419				23.7055	12.8072	18.556	13.5529	10.8784	14.3482	25.3745	16.4409	15.156	16.7973	16.9368	13.5016	21.2602	12.8531	10.7132	10.6413	12.1835
50		84	78.6	82	75.7	64	76.2	73.3	66.7609	79.3633	79.0173	79.8883	80.2836	73.6913	64.597	77.6209	84.2642	76.1881				22.5738	13.4739	19.3002	14.326	11.6245	14.8544	26.0299	16.4361	16.1351	16.6099	17.4173	13.8431	21.4003	13.211	10.7744	11.2133	13.4003
52		83	77.4	81	74.4	63	74.8	71.9	65.0256	78.1337	77.7799	78.6734	79.0966	72.2484	62.8235	76.3317	83.2457	74.8342				18.2408	14.9343	19.2712	13.8201	12.095	15.2689	28.0819	17.3045	16.9794	16.9738	18.2937	13.7642	22.8558	13.6305	10.9533	11.8594	13.4135
54		82	76.1	79	73	61	73.5	70.4	63.2902	76.9042	76.5425	77.4585	77.9096	70.8055	61.0499	75.0424	82.2272	73.4804				15.7127	15.1159	20.133	14.8082	12.3737	15.8314	29.582	18.3656	18.1587	18.4104	18.706	13.8891	22.36	13.7779	12.0831	12.2959	13.6637
56		81	74.8	78	71.7	59	72.2	68.9	61.5549	75.6747	75.3051	76.2436	76.7226	69.3626	59.2764	73.7531	81.2086	72.1265				16.6524	15.8579	21.1615	15.3843	13.0263	16.5361	29.8862	19.2866	19.5506	18.6178	20.2504	14.3077	22.148	14.8135	12.4838	12.1958	14.6071
58		80	73.6	77	70.4	57	70.8	67.5	59.8195	74.4452	74.0677	75.0287	75.5356	67.9197	57.5028	72.4639	80.1901	70.7727				15.3119	16.3094	21.8161	16.1336	13.3695	17.1605	31.76	19.4773	20.2349	21.5344	21.4963	14.8573	24.0803	15.7831	13.1619	13.1032	15.22
60		79	72.3	76	69	55	69.5	66	58.0842	73.2157	72.8303	73.8138	74.3485	66.4768	55.7293	71.1746	79.1716	69.4188				16.3617	16.8987	22.8128	17.2668	14.1344	17.6708	32.5554	20.8052	22.2152	20.889	21.2129	15.0909	25.8381	15.9297	13.612	12.915	15.0963
62		78	71.1	75	67.7	54	68.2	64.5	56.3488	71.9861	71.5929	72.5989	73.1615	65.0339	53.9557	69.8853	78.1531	68.0649				16.6909	17.7619	23.4431	16.8772	14.3102	17.9632	34.6324	22.2238	24.409	23.4324	21.5731	15.5753	26.3485	16.5394	13.8267	13.326	15.66
64		77	69.8	74	66.3	52	66.8	63.1	54.6135	70.7566	70.3555	71.3839	71.9745	63.591	52.1822	68.5961	77.1345	66.7111				17.8128	19.6458	24.9592	18.9767	14.8246	18.3996	35.6918	23.1121	24.4673	25.5599	22.1966	16.2808	28.4362	17.5066	13.761	13.949	16.1631
66		76	68.6	73	65	50	65.5	61.6	52.8781	69.5271	69.1181	70.169	70.7875	62.1481	50.4086	67.3068	76.116	65.3572				17.9208	19.8649	27.0014	19.7987	16.3331	19.1345	37.0792	24.4347	27.8145	25.5952	24.472	17.0453	30.2953	18.233	14.6589	14.0928	17.2388
68		75	67.3	71	63.6	48	64.2	60.1	51.1428	68.2976	67.8807	68.9541	69.6005	60.7052	48.6351	66.0175	75.0975	64.0034				19.2782	20.2418	27.1422	19.002	16.6531	19.8346	38.0739	26.5413	27.8539	27.2667	24.7749	17.6149	30.5507	19.3456	14.0093	14.5443	17.5821
70		74	66.1	70	62.3	46	62.8	58.7	49.4074	67.0681	66.6433	67.7392	68.4135	59.2623	46.8615	64.7283	74.079	62.6495				18.9713	20.8082	28.3962	19.8434	17.1366	20.6392	41.2083	26.9723	30.0091	29.5032	25.7563	19.0954	32.2283	19.8632	14.7615	15.0459	17.6405
72		73	64.8	69	61	45	61.5	57.2	47.6721	65.8386	65.4059	66.5243	67.2265	57.8194	45.0879	63.439	73.0604	61.2957				20.9294	21.4412	28.4358	20.6347	18.1125	21.3732	44.0704	27.572	29.508	31.1224	27.7263	19.1789	34.2139	20.9889	15.571	15.5401	18.9169
74		72	63.5	68	59.6	43	60.2	55.7	45.9367	64.609	64.1685	65.3094	66.0395	56.3765	43.3144	62.1497	72.0419	59.9418				20.0717	23.2155	28.4321	20.9216	18.7036	22.1276	45.0563	29.3133	31.6366	34.4565	27.9933	19.9616	35.4669	22.0996	16.5016	15.6978	19.5929
76		71	62.3	67	58.3	41	58.8	54.2	44.2014	63.3795	62.9311	64.0945	64.8525	54.9336	41.5408	60.8605	71.0234	58.5879				23.1143	24.4088	31.3502	22.2615	19.3442	22.8763	47.652	31.1161	32.043	36.4755	28.574	21.1019	37.9513	23.1631	16.8138	15.8869	20.4897
78		70	61	66	56.9	39	57.5	52.8	42.466	62.15	61.6937	62.8796	63.6655	53.4907	39.7673	59.5712	70.0049	57.2341				22.7507	23.8825	33.9969	22.7782	19.395	23.852	48.5121	32.2213	32.5087	37.3089	30.588	21.2854	41.0651	23.5996	19.5099	17.4333	20.3858
80		69	59.8	65	55.6	37	56.2	51.3	40.7307	60.9205	60.4563	61.6647	62.4785	52.0478	37.9937	58.2819	68.9863	55.8802				27.5698	25.5564	33.154	24.5279	20.3586	24.7983	48.313	34.0159	39.0122	38.2188	31.8978	22.32	44.1665	25.9569	20.1284	17.5662	21.0288
82		68	58.5	63	54.3	36	54.8	49.8	38.9954	59.691	59.2189	60.4497	61.2915	50.6049	36.2202	56.9927	67.9678	54.5264				25.3403	26.6815	34.4867	25.7716	21.7802	25.4767	49.7287	36.1434	40.4933	40.8832	32.828	22.9701	48.2951	26.7795	19.6958	18.7134	23.7162
84		67	57.3	62	52.9	34	53.5	48.4	37.26	58.4614	57.9815	59.2348	60.1045	49.162	34.4466	55.7034	66.9493	53.1725				29.8153	28.7715	38.87	27.9079	22.9715	26.1443	49.1924	39.2296	41.9284	42.1193	33.538	24.0087	51.8392	27.5872	22.4651	19.0458	24.4218
86		66	56	61	51.6	32	52.2	46.9	35.5247	57.2319	56.7441	58.0199	58.9175	47.7191	32.6731	54.4141	65.9308	51.8186				31.1207	26.6298	39.6207	27.8902	22.4965	26.9458	52.6269	41.721	42.6487	44.5938	34.933	25.2045	59.2362	28.3958	23.4089	19.7937	25.7836
88		65	54.8	60	50.2	30	50.8	45.4	33.7893	56.0024	55.5067	56.805	57.7305	46.2762	30.8995	53.1249	64.9122	50.4648				34.3249	30.3454	38.3358	29.3474	24.7804	28.0607	56.6777	43.5525	44.267	48.1873	37.6943	25.4026	66.076	29.9613	22.9994	20.1859	25.6135
90		64	53.5	59	48.9	28	49.5	44	32.054	54.7729	54.2693	55.5901	56.5435	44.8333	29.126	51.8356	63.8937	49.1109				33.76	32.2347	42.3611	30.5285	24.0685	29.5063	59.0476	48.8047	45.7058	51.0515	39.4662	26.8555	69.0277	29.6114	25.9946	20.9023	26.4004
92		63	52.2	58	47.5	27	48.2	42.5	30.3186	53.5434	53.0319	54.3752	55.3565	43.3904	27.3524	50.5463	62.8752	47.7571				35.617	32.0682	45.5194	33.1241	26.2367	31.1484	61.0544	52.245	46.0487	53.2751	41.0476	29.8438	75.3157	30.6005	24.7971	21.6942	27.3105
94		62	51	57	46.2	25	46.8	41	28.5833	52.3139	51.7945	53.1603	54.1694	41.9475	25.5788	49.2571	61.8567	46.4032				36.2768	35.1571	45.5003	32.9806	25.5662	32.5783	59.0308	56.5051	49.0693	52.38	42.6609	31.1641	83.844	32.1015	26.9797	21.7762	28.7869
96		61	49.7	55	44.9	23	45.5	39.5	26.8479	51.0843	50.5571	51.9454	52.9824	40.5046	23.8053	47.9678	60.8381	45.0494				36.9988	36.1607	46.4483	34.6815	25.6873	33.6761	60.8403	59.2657	50.1478	54.7788	44.5778	34.3762	89.9443	33.2657	28.0138	23.1557	29.7862
98		59	48.5	54	43.5	21	44.2	38.1	25.1126	49.8548	49.3197	50.7304	51.7954	39.0617	22.0317	46.6785	59.8196	43.6955				38.908	37.0056	47.3305	34.7792	26.3893	34.976	62.0586	62.4439	53.0762	56.7298	46.1387	38.6622	94.4319	34.3338	28.8041	23.6181	31.5825
100		58	47.2	53	42.2	20	42.8	36.6	23.3772	48.6253	48.0823	49.5155	50.6084	37.6188	20.2582	45.3892	58.8011	42.3416				36.823	38.1974	49.1592	36.3798	25.7694	35.2239	63.1261	74.0169	53.1878	57.6362	49.3755	41.1615	96.0528	35.7007	29.8321	24.5658	32.2229
																					SM	s1	s2	s3	s4	s5	s6	s8	s9	s10	s11	s12	s13	s14	s15	s16	s17	s18
																					shear modulus (kPa)	9.87879	5.56317	9.01308	7.62047	7.09186	7.84473	10.011	10.5586	9.36072	11.2189	7.7161	8.52909	12.049	8.15569	8.32914	9.01814	7.4565
																						10.0432	5.6561	8.85482	7.81394	7.43826	7.86082	10.2733	10.4782	9.80447	11.2178	7.71257	8.46379	12.084	8.1979	8.52784	9.01906	8.09062
																						10.8138	6.23897	9.3688	8.64749	7.84479	8.01251	11.1465	10.7064	9.89394	11.963	7.75576	8.08034	12.5781	8.46173	8.81873	9.94802	7.96332
																						11.1455	6.40794	9.69088	9.27399	8.17351	8.32644	11.198	10.7455	9.5643	12.4851	7.89871	9.23686	12.8213	9.30915	8.83044	8.87391	7.90391
																						9.60467	6.37915	9.92516	8.41995	8.10377	8.54637	11.4802	9.98169	10.5398	13.3963	7.95016	8.62453	13.512	8.82717	9.53429	9.47349	8.73324
																						9.11173	6.78922	10.478	9.34294	7.99527	8.77013	11.0006	10.5788	10.0356	13.2595	7.82993	8.40602	12.8664	9.93851	9.41661	9.3089	8.21425
																						9.49753	6.07228	10.816	7.94989	8.60575	9.03228	11.1714	10.6705	10.0748	13.209	7.84813	8.41992	13.2408	9.52556	9.6148	8.89321	8.39135
																						10.0889	7.19882	11.5569	9.44233	8.44495	9.16778	11.498	10.4235	10.4577	13.628	8.28955	9.06587	13.7684	8.98058	9.44839	9.24075	8.58934
																						11.0939	7.19358	11.6241	8.56977	8.56784	9.27602	11.7502	10.2198	11.1839	13.2002	8.05864	9.00214	14.2567	9.72001	9.9331	10.024	8.76275
																						9.94976	7.46151	11.9605	8.754	8.48898	9.27514	11.9429	10.9683	11.0757	13.694	8.3819	8.96431	14.7825	9.39272	10.5882	10.1659	8.96159
																						9.68186	7.15816	11.9777	8.48234	9.4619	9.48269	12.6019	10.6307	11.4947	14.5672	8.43349	9.48073	15.3025	10.1003	10.4962	10.3862	9.29375
																						9.98537	7.39675	12.1227	9.24873	10.3526	9.863	12.906	10.6124	11.2611	15.2245	8.38517	9.81009	16.9332	10.0664	11.2571	9.8693	9.45087
																						10.4003	7.83285	12.8413	10.0868	10.7706	10.2349	13.3969	11.1872	11.3462	15.0946	8.85164	9.76186	16.0256	10.1037	11.6649	11.2752	9.97046
																						11.1349	8.13788	13.7935	10.0619	10.4062	10.7282	14.3038	11.5718	11.5688	16.1723	9.39427	9.79164	16.1973	10.1032	12.3011	11.1355	9.96915
																						10.6989	8.39746	14.319	10.7245	11.4659	11.1973	14.6718	11.5227	11.3536	17.0984	9.46238	10.2824	16.0072	10.517	12.6892	11.3159	10.2295
																						10.9916	8.18238	14.8919	10.5337	10.746	11.6284	15.7914	12.0492	11.7645	18.1376	10.0364	10.3835	17.6633	11.2337	12.8216	11.6933	10.944
																						11.4193	8.59299	15.4325	11.0831	11.054	12.1279	16.4448	12.7149	12.002	18.6889	9.84845	10.7992	17.7589	11.5318	13.0645	11.9614	11.1605
																						11.685	8.70913	16.6949	11.8073	11.3408	12.6212	17.1908	12.8709	12.7498	19.4793	10.401	11.1022	17.154	11.4229	13.0298	11.8674	11.8628
																						12.5229	9.2047	17.5128	11.8356	12.5734	13.0638	18.6419	13.3297	12.9181	19.9022	11.0591	11.7209	18.1198	12.2515	14.6659	12.1797	12.4234
																						13.2275	10.0737	17.5332	11.9949	12.2379	13.6051	19.3486	13.2106	13.2831	19.9341	11.1932	12.4631	19.3173	12.1135	14.7384	12.4997	13.2129
																						13.7123	10.9229	18.6264	12.8207	13.2084	14.2328	20.3597	13.4641	13.2235	20.249	11.7558	12.4571	21.0042	12.5471	14.9826	12.7941	13.7124
																						14.2836	10.9912	18.4782	13.9221	13.5064	14.8747	21.4569	13.7757	14.0557	21.1702	12.1459	12.6092	21.4362	12.8008	15.3849	14.186	14.0025
																						14.6854	11.6858	19.8723	14.1394	14.4303	15.3443	22.1459	14.6404	15.1126	22.8907	12.7961	13.1101	22.7393	13.3209	15.4875	13.4207	14.6918
																						14.8967	11.881	20.8851	15.6088	14.2596	15.9003	24.6178	15.0596	16.5706	23.625	12.5813	13.6917	23.2096	13.6966	16.3053	13.9601	15.3356
																						15.4402	11.5396	21.6005	15.9138	15.9123	16.6854	25.3697	15.6033	16.9494	24.9312	13.3607	13.8731	23.6784	15.0469	16.7451	13.8209	16.1431
																						16.9596	11.4565	22.5357	16.3219	17.2054	17.5724	27.2614	16.2836	17.3579	26.8069	14.2881	14.4844	24.9642	15.9924	17.1271	13.9337	17.931
																						18.5118	12.1883	23.2584	17.8907	17.9596	18.5846	28.6074	17.2847	17.7081	28.2474	14.8124	15.2875	25.4488	14.871	17.6544	14.5374	18.0927
																						18.8676	12.8661	24.8639	19.2457	19.5652	19.254	30.0124	18.382	18.7819	30.0105	15.1115	16.2766	26.7445	16.1161	18.1628	15.4007	19.1779
																						19.2462	14.1137	26.3747	20.5857	20.3784	20.0206	31.0472	19.2121	19.4444	30.6755	16.2316	16.5432	28.1014	15.4497	19.297	16.8311	20.0866
																						20.6551	14.538	28.0043	21.6065	21.6391	20.8053	33.5957	20.301	21.0749	32.304	17.8009	17.1296	31.9922	16.6398	19.8942	17.5472	20.8632
																						22.6471	15.4622	28.638	23.0221	22.9646	21.6426	35.1276	22.1977	21.8022	32.8907	18.4988	17.9679	31.211	16.3857	20.5124	17.5234	21.9568
																						23.5374	15.6521	29.4874	23.7601	24.36	22.5661	36.9454	23.2362	23.3623	34.5115	19.1834	18.813	32.4438	16.9716	20.6289	17.3483	23.056
																						24.7424	16.5104	30.2838	25.0844	25.6628	23.7475	39.9856	24.9928	23.9464	36.8444	19.7905	18.9356	34.2573	17.1769	22.7843	18.2917	24.4252
																						25.7621	16.3696	30.1819	27.0723	28.6332	25.1028	41.1758	27.172	25.8498	37.1473	21.9246	20.0276	36.8282	19.4821	23.1162	18.4939	26.3948
																						27.099	18.9142	32.2214	27.8635	29.931	26.6529	43.6623	29.2948	27.125	37.0731	23.0122	20.9709	39.0118	19.4463	23.3796	20.0619	26.9618
																						28.245	19.8059	33.4429	29.2696	31.4609	28.4499	46.0705	29.6143	27.6997	37.069	24.6463	21.7502	42.3445	21.6944	24.3542	21.7038	28.2776
																						28.9025	20.6674	36.238	31.5969	33.5657	30.1645	48.7748	31.9671	29.5339	37.9909	24.356	23.6378	47.5631	20.4106	25.9675	22.2491	29.5825
																						30.1506	21.9253	36.7764	33.2736	35.6582	31.6753	53.3718	33.2449	30.2596	43.0532	26.969	24.3747	47.9607	21.5452	27.6919	22.7708	32.043
																						31.0747	22.267	39.19	34.3333	37.252	33.1612	54.8166	34.8456	30.9588	44.7962	26.7019	25.6952	52.4781	22.5821	29.4944	23.7798	34.1824
																						32.3783	22.2207	42.0083	35.1154	39.2722	34.3961	58.344	37.3004	30.4746	47.3258	27.3816	27.1641	49.7162	23.559	28.888	23.1102	36.0725
																						33.6911	26.9709	45.8132	38.9709	40.6797	35.6876	62.6691	40.4747	31.1379	50.5791	29.8329	27.3666	51.6398	23.9212	31.0115	24.5596	36.7756
																						32.8915	27.6591	46.2311	38.3691	39.4905	37.3969	64.7256	42.7664	32.3526	52.864	32.4029	28.0548	59.62	24.6101	32.4151	26.9507	39.565
																						36.4516	26.3209	52.0307	42.4572	38.7414	39.3008	66.209	45.7424	34.4266	54.97	34.1738	29.4119	64.8643	25.7695	35.4672	27.1214	42.3703
																						38.7338	28.8795	54.9181	43.3939	41.5094	41.7394	72.8043	47.8842	38.2713	59.3423	37.4512	29.3627	61.7508	28.6061	37.6532	28.741	43.4623
																						41.1923	31.2665	58.3009	45.41	40.1091	44.7027	80.3221	49.9729	42.2178	63.6698	38.6468	32.6208	65.4154	27.1238	39.3245	29.1269	48.0641
																						42.2649	30.9101	59.9339	50.08	38.5816	47.695	79.3211	54.8873	46.8435	65.9239	40.039	34.3197	67.4135	28.7454	42.4874	31.8824	49.7628
																						43.3811	32.9858	61.1115	54.462	41.079	50.3483	88.1493	58.8109	47.911	69.7244	41.5708	36.3248	76.839	33.2947	45.406	31.6224	53.1472
																						44.5768	35.0953	67.0554	54.3103	42.6803	52.5271	86.7015	62.288	50.1006	71.0707	45.6135	37.6825	80.8986	34.2399	46.8811	31.2068	55.7019
																						46.1312	38.4966	70.5908	55.5797	41.5116	54.5	87.05	69.9252	50.787	75.5336	50.6524	41.14	83.336	37.5375	49.998	34.2161	60.1594
																						51.9611	40.6575	76.3938	52.7213	43.0012	55.9351	85.002	73.3872	50.6203	77.1689	55.8644	43.578	83.2549	36.2565	53.7983	38.6397	60.9146
																						54.2617	39.9085	80.3878	58.6508	44.0263	57.0902	88.553	80.5463	51.4945	80.9831	57.3297	46.4228	84.3671	38.296	57.3132	40.7432	69.0243
																					BF-lh	s1	s2	s3	s4	s5	s6	s8	s9	s10	s11	s12	s13	s14	s15	s16	s17	s18
																					shear modulus (kPa)	10.6105	7.05708	9.71963	7.42827	7.21335	10.885	13.2017	18.121	13.3268	13.4217	15.7383	9.50489	12.1391	9.46523	13.3204	15.7371	10.3893
																						10.6673	7.05716	10.0163	7.36853	6.39553	11.2143	14.1959	17.2969	13.4557	13.7499	15.7399	9.41552	12.1397	9.46376	13.7143	15.8711	12.3096
																						10.9824	7.64331	11.1506	7.50557	7.02496	11.5755	14.4034	17.1821	14.6974	14.6936	17.1807	9.68916	12.4935	9.84597	14.7382	16.1097	11.88
																						11.3985	6.93382	11.0123	7.27846	6.64344	11.895	15.0176	17.5715	14.5923	15.2343	19.3903	10.1427	12.7445	9.92604	13.4799	16.2462	11.5657
																						11.7121	7.53864	11.5573	7.28077	6.98038	12.1713	15.2	17.1056	15.0194	15.6699	19.5889	10.7868	13.0985	10.2623	12.8994	16.3526	12.1408
																						10.8525	7.35404	11.0944	8.42783	6.95565	12.3501	16.2586	17.2738	15.0773	15.8279	19.7576	10.5882	12.6618	10.3497	13.0449	16.7033	11.7333
																						11.2071	7.64875	11.1805	7.60779	7.71399	12.4809	16.8669	17.3885	15.9043	16.1751	20.9756	10.5819	12.8346	10.517	13.1342	16.7589	11.3046
																						11.4665	7.90202	11.7446	7.63661	7.72462	12.7099	17.4698	18.7257	16.7255	16.7343	21.6861	10.4139	12.46	11.0437	13.3468	16.8589	12.2853
																						11.0194	8.19812	11.5247	7.89344	8.639	12.8624	19.6252	19.1326	16.6082	17.4716	22.2678	10.7951	13.2904	11.0263	12.9864	17.7438	11.8795
																						11.2843	7.99028	11.8213	7.93337	8.25104	12.973	20.7575	19.855	17.0077	17.6717	22.132	10.9358	13.3189	11.3326	13.0907	18.1224	12.1234
																						11.5464	8.88145	12.894	8.09768	8.21795	13.253	22.0494	19.8939	17.9294	18.0392	22.7379	11.1059	13.4928	11.6288	12.7909	18.2309	11.7923
																						11.6507	9.46017	12.9594	8.19511	8.52985	13.4262	22.8218	20.901	18.2348	19.6611	23.4825	11.6614	14.5168	12.1703	13.4485	18.8994	11.9059
																						11.8097	8.93411	13.8905	8.97939	8.76194	13.7154	23.323	20.4354	19.5864	21.4048	23.6535	12.4845	14.2793	12.467	13.528	18.9913	11.7314
																						11.9173	8.24436	14.1885	8.34403	8.94058	13.9488	25.5038	19.5774	19.4848	23.7836	23.2995	12.4586	15.0347	13.618	13.6132	18.882	11.4364
																						12.3483	9.02852	14.7774	8.36307	8.77209	14.2495	26.9917	20.4964	19.8181	25.7479	24.7312	12.5423	15.8646	13.8956	13.7169	18.8039	11.9849
																						13.0051	9.40549	14.8902	8.955	9.74256	14.6584	28.1945	21.5889	20.4862	27.9022	25.857	12.57	16.3744	14.6479	14.7109	19.8206	11.9815
																						13.19	10.307	15.8046	9.34998	9.52808	15.2261	29.2208	22.6648	21.7651	28.5835	26.1383	13.0518	17.4263	15.182	15.316	20.4434	11.5902
																						13.6874	10.0286	17.1968	9.12485	9.56962	16.292	32.703	22.3651	22.2102	31.577	26.2202	13.5118	18.0446	15.5053	15.136	20.1308	12.7091
																						14.6911	10.1856	16.7702	9.84284	10.1009	17.2051	35.4654	21.8181	23.2095	36.0823	26.7772	13.2883	19.0619	16.4464	16.0016	20.1607	14.0019
																						14.7586	11.6272	18.052	10.3674	10.0641	17.7115	35.8453	23.4085	24.0224	36.4887	27.2681	13.4786	19.7883	16.9463	16.9044	20.6259	14.0389
																						13.9681	13.2875	19.1997	10.594	10.5506	18.9039	37.5508	24.5218	25.398	38.7906	28.4369	14.3879	20.6733	17.8894	17.3252	21.3137	14.5548
																						15.2788	13.3043	19.039	11.1683	10.5926	19.5182	37.643	23.4964	26.1441	40.5897	29.0838	14.9019	22.2371	18.8672	17.5614	21.7595	15.2811
																						14.7806	13.8477	20.7407	12.072	11.4313	20.2036	40.1037	23.3251	27.5029	42.348	29.1363	15.383	22.853	20.1135	18.1299	21.2827	15.6747
																						15.5671	15.4829	21.8771	12.1464	12.4834	21.1011	44.9415	24.7467	28.0844	42.0204	30.2487	15.7545	24.2929	21.0933	18.5545	21.549	16.4644
																						16.33	16.7281	23.76	13.1723	13.0919	21.7327	46.6774	25.8164	28.8965	43.77	31.7846	15.9756	25.1257	22.5008	18.8414	22.6305	17.6138
																						17.7125	17.7131	25.5605	14.3812	14.0455	22.7733	46.4865	25.691	30.2674	44.83	33.176	16.469	26.1698	23.9868	19.0157	23.3314	19.0576
																						19.603	18.1961	25.8068	16.0757	14.4221	23.7184	47.6594	25.692	31.8726	45.3702	35.1041	17.1922	27.7411	24.8627	19.8219	23.4744	20.6793
																						21.6645	17.7895	27.5395	16.5505	14.9184	24.98	51.4573	26.3992	32.6954	45.239	37.1052	18.6096	30.4018	25.5856	20.7588	23.7633	22.3487
																						21.9482	21.0131	27.803	17.7601	15.5214	25.8568	56.8129	27.1163	34.0059	47.2122	38.9546	19.1101	30.7547	26.9974	21.5954	24.0742	22.3411
																						21.4559	22.7302	28.2168	18.0834	16.327	27.0292	56.5255	28.0946	35.576	47.7829	39.9321	20.0479	32.7173	29.1411	22.0552	24.2647	24.4561
																						22.5996	24.9393	28.774	19.4698	17.2337	28.2204	58.6395	27.4904	36.3347	51.441	43.5289	20.8498	34.6101	30.5563	22.94	24.9632	25.3316
																						23.1314	23.8029	30.4931	20.7313	18.2021	29.2656	61.2819	29.8371	38.4396	53.7639	44.3219	21.7414	38.2589	32.1455	24.1419	25.5985	25.8948
																						27.3536	26.0385	32.2272	21.954	19.6067	29.8789	62.9351	31.4897	39.3631	56.4382	44.6696	21.9921	40.0234	34.7995	24.5539	25.9225	27.5426
																						27.571	28.5365	34.7755	23.4792	20.2334	30.7108	62.9311	33.7027	41.8758	58.7374	48.6843	23.6589	41.219	36.5287	25.0898	26.6802	28.9835
																						30.7181	29.8835	35.7538	24.6993	22.1301	31.6211	64.2296	33.72	43.8244	60.2616	49.6648	24.3587	42.4639	37.5306	26.7311	27.0531	31.1372
																						29.9132	30.8363	35.5799	26.7131	23.3741	32.6963	69.5025	36.2619	43.5396	62.8684	51.1154	26.1513	46.0319	39.5773	27.0381	27.4292	31.5457
																						30.5209	30.9621	36.9121	27.6186	24.7864	34.4594	69.7858	38.3322	45.6945	69.78	55.9777	26.847	46.3913	42.0436	28.5189	30.4252	34.1871
																						33.3561	34.9469	41.1544	29.2541	26.1036	36.3232	69.8239	40.2908	46.9137	67.4853	57.5985	28.6146	48.9732	43.1491	29.9953	29.7812	33.9809
																						33.1563	37.3333	42.3683	29.8391	26.2872	38.1667	68.3604	43.5798	47.4489	68.629	60.9373	29.8631	49.3372	46.5315	30.0361	29.8738	34.8158
																						34.4387	39.7109	44.1397	30.9488	29.2178	40.1391	72.6347	42.3062	49.3182	72.683	63.0768	31.4868	49.2401	48.1095	31.986	31.1909	35.2998
																						32.3588	40.9111	43.4667	31.436	30.7119	42.9388	74.3242	44.3138	53.2441	72.6368	67.6357	32.9572	52.1495	50.4538	33.0656	33.3512	36.1462
																						32.9088	42.4841	44.2304	33.7865	30.4736	45.5601	75.8101	45.8575	52.2736	74.6754	69.0772	34.4751	55.1301	51.5294	33.3488	34.0114	38.1914
																						36.2364	44.5662	44.2838	36.6241	32.5002	48.0082	71.1758	46.6962	53.1665	71.1505	72.372	36.9295	56.3542	55.3052	36.4603	34.8039	36.8628
																						37.8961	48.7122	45.8492	36.9119	35.5256	50.2309	76.3955	50.8083	54.8008	71.9693	73.1048	38.4973	59.2459	55.6231	36.5503	34.7267	39.7257
																						44.216	51.7636	48.021	38.9975	36.4744	51.9219	72.9677	52.467	54.2814	72.0643	77.7338	40.1748	58.9375	58.0063	39.2656	34.215	39.282
																						41.9336	54.3141	49.0397	41.5052	36.3045	54.1732	71.3234	49.5582	56.1627	74.8978	78.219	41.4339	61.0258	59.4983	40.5741	36.5289	40.4698
																						43.5968	57.4429	48.7255	43.2679	37.6625	56.1726	74.1523	53.7285	58.5416	77.4206	81.5764	43.4933	58.8968	61.5849	41.581	35.9454	41.825
																						46.3743	61.3985	47.7196	44.523	40.425	57.551	78.0689	56.041	59.4408	78.9043	82.6293	45.739	61.3159	62.2182	39.5831	39.5372	42.896
																						49.0767	64.0603	48.3958	43.7577	40.4641	58.7299	81.1061	58.9272	58.9666	79.0093	85.4158	46.0651	64.9662	63.5738	42.6942	39.2407	41.8986
																						45.8273	65.1242	49.6873	45.0039	41.58	59.4519	78.0737	59.1606	59.6704	79.9733	90.0162	48.1453	68.0078	66.0242	44.1115	38.39	45.8448
																						45.0572	65.853	50.1674	49.1177	43.2471	60.1837	85.8808	56.7574	61.7513	79.103	89.8765	49.376	70.3351	65.8995	47.1492	39.2667	47.2558

## Sheet: HF_110
knee ROM (%)	knee ROM (°)	s1	s2	s3	s4	s5	s6	s8	s9	s10	s11	s12	s13	s14	s15	s16	s17	s18			ST	s1	s2	s3	s4	s5	s6	s8	s9	s10	s11	s12	s13	s14	s15	s16	s17	s18
0		110.146	110	110.228	109.249	109.148	109.525	110.1	110.145	110.101	109.952	110.261	109.959	109.764	108.936	109.853	109.727	110.035			shear modulus (kPa)	14.4943	10.0467	15.5819	15.7307	7.54747	8.45374	14.6421	15.2255	12.4483	12.3637	10.7138	12.7937	12.7022	9.09536	10.2258	8.12221	9.65665
2		109	108.7	109	107.9	107	108.2	108.6	108.409	108.872	108.715	109.046	108.772	108.321	107.162	108.563	108.709	108.681				14.4939	11.3039	15.5822	15.7308	7.68636	8.45415	14.6421	15.2255	12.4786	12.9966	10.7133	12.6767	13.0725	9.15108	10.2979	8.5542	10.1895
4		108	107.5	108	106.6	106	106.9	107.1	106.674	107.642	107.477	107.831	107.585	106.878	105.389	107.274	107.69	107.327				14.5365	12.6773	14.0184	16.445	7.96138	8.48828	14.9899	14.1086	12.8934	12.8719	11.0687	12.6946	13.2667	9.32276	10.3898	8.87108	11.1994
6		107	106.2	107	105.2	104	105.5	105.7	104.939	106.413	106.24	106.616	106.398	105.435	103.615	105.985	106.672	105.973				14.8003	10.464	14.2415	17.0225	7.51899	8.77756	15.1772	14.8744	12.5903	13.0157	11.7533	13.3437	13.4074	9.83795	10.0652	9.41053	11.126
8		106	105	106	103.9	102	104.2	104.2	103.203	105.183	105.003	105.401	105.211	103.992	101.842	104.696	105.653	104.619				14.9038	9.7766	11.8268	17.0788	8.27404	9.09222	15.2487	14.4006	13.0957	13.0508	12.0757	12.9455	13.3318	9.63108	10.9042	10.4077	11.3543
10		105	103.7	105	102.5	100	102.9	102.7	101.468	103.954	103.765	104.187	104.024	102.549	100.068	103.406	104.635	103.265				14.6314	11.1495	12.5827	17.1248	8.36324	9.28336	14.972	14.5222	12.8646	13.9201	12.5811	12.9303	13.5935	9.34519	10.6402	10.3741	11.6509
12		104	102.5	103	101.2	98	101.5	101.3	99.7326	102.724	102.528	102.972	102.837	101.106	98.2946	102.117	103.616	101.911				14.3754	11.8356	12.7847	17.9989	8.57202	9.47162	15.2543	14.9906	13.0561	14.0623	12.7566	13.2989	14.128	9.79688	10.6046	10.2765	11.7254
14		103	101.2	102	99.9	97	100.2	99.8	97.9972	101.495	101.29	101.757	101.65	99.6635	96.521	100.828	102.598	100.558				15.2002	12.1026	12.2782	18.6883	8.92552	9.70019	15.0673	15.8219	13.0645	15.415	12.6861	13.01	14.6868	10.0587	10.8415	10.7369	11.8724
16		102	100	101	98.5	95	98.9	98.3	96.2619	100.265	100.053	100.542	100.463	98.2206	94.7475	99.5385	101.579	99.2037				15.7792	12.2532	12.3606	18.3386	9.19989	9.95434	15.4324	16.8607	13.1397	12.9242	14.0048	13.0549	14.8151	10.2409	10.9367	10.0732	11.989
18		101	98.7	100	97.2	93	97.5	96.9	94.5265	99.0355	98.8157	99.3269	99.2757	96.7777	92.9739	98.2492	100.561	97.8498				15.884	10.4377	15.424	21.0122	9.45946	10.327	16.1103	16.5655	13.6037	12.6862	14.5722	13.4701	15.3322	10.3465	10.6385	10.1501	12.4336
20		100	97.4	99	95.8	91	96.2	95.4	92.7912	97.806	97.5783	98.112	98.0887	95.3348	91.2004	96.9599	99.5421	96.4959				16.5552	10.8881	14.9136	21.5963	9.81837	10.7585	16.3623	16.5179	14.0108	12.4551	14.4008	14.4166	16.2641	10.9845	10.9963	10.9593	12.9265
22		99	96.2	98	94.5	89	94.9	93.9	91.0558	96.5765	96.3409	96.8971	96.9017	93.8919	89.4268	95.6707	98.5236	95.1421				17.6152	11.2038	14.1483	20.9699	10.8267	11.3052	16.785	17.3052	14.0517	13.9315	14.0833	14.2551	16.8066	11.0891	10.7739	10.6006	13.8352
24		98	94.9	97	93.2	88	93.5	92.4	89.3205	95.347	95.1035	95.6822	95.7147	92.449	87.6533	94.3814	97.5051	93.7882				17.1719	10.3858	14.619	21.6766	10.6963	11.7827	17.1275	16.7319	14.4372	13.2636	14.1835	13.0056	18.0485	11.2839	12.1658	10.6922	13.6518
26		97	93.7	95	91.8	86	92.2	91	87.5851	94.1175	93.8661	94.4673	94.5276	91.0061	85.8797	93.0921	96.4865	92.4344				18.3512	11.5208	14.6604	21.2302	11.6094	12.2242	17.9162	17.1447	15.5962	13.7646	13.9761	13.0469	19.0573	11.6212	11.9929	10.7071	13.6301
28		96	92.4	94	90.5	84	90.9	89.5	85.8498	92.888	92.6287	93.2524	93.3406	89.5632	84.1061	91.8029	95.468	91.0805				16.9618	11.7004	16.0757	19.8917	12.3588	12.675	18.7902	17.9004	15.3002	15.1178	14.5957	13.5688	20.1795	11.7312	13.3812	11.2957	14.6472
30		95	91.2	93	89.1	82	89.5	88	84.1144	91.6584	91.3913	92.0375	92.1536	88.1203	82.3326	90.5136	94.4495	89.7267				18.1053	13.2333	15.6457	19.7112	13.5313	13.2651	19.8106	17.7589	15.718	15.0292	16.1742	13.7686	21.095	12.0756	12.973	12.0965	14.1679
32		94	89.9	92	87.8	80	88.2	86.6	82.3791	90.4289	90.1539	90.8225	90.9666	86.6774	80.559	89.2243	93.431	88.3728				17.4214	15.4978	17.484	19.2394	14.0547	13.7027	20.6988	18.4503	16.4354	15.031	15.9778	14.1191	22.8556	12.8833	12.8012	11.7073	15.0077
34		93	88.7	91	86.4	79	86.8	85.1	80.6437	89.1994	88.9165	89.6076	89.7796	85.2345	78.7855	87.9351	92.4124	87.0189				17.2915	12.4449	18.0602	20.6936	14.3545	14.0333	21.1025	18.8832	16.5994	16.3427	16.1561	13.6328	24.0055	13.5552	14.6591	12.9007	15.4476
36		92	87.4	90	85.1	77	85.5	83.6	78.9084	87.9699	87.6791	88.3927	88.5926	83.7916	77.0119	86.6458	91.3939	85.6651				18.5019	13.6517	17.6434	21.5698	14.8779	14.3364	21.6491	19.6008	17.0288	16.377	16.9548	14.5755	24.4842	13.8319	13.9256	12.7238	15.7209
38		91	86.1	89	83.8	75	84.2	82.2	77.173	86.7404	86.4417	87.1778	87.4056	82.3487	75.2384	85.3565	90.3754	84.3112				18.8164	14.7721	18.0283	23.3572	16.0588	14.5802	22.7787	19.7937	18.5015	17.1757	17.0369	14.4319	24.8716	14.4761	14.0291	13.1215	16.4137
40		89	84.9	87	82.4	73	82.8	80.7	75.4377	85.5108	85.2043	85.9629	86.2186	80.9058	73.4648	84.0673	89.3569	82.9574				18.1074	15.1194	19.7951	25.5955	16.8903	14.8268	23.1995	20.9105	18.9668	17.2732	17.7083	13.9913	27.0337	14.7438	15.063	12.7684	17.1582
42		88	83.6	86	81.1	72	81.5	79.2	73.7023	84.2813	83.9669	84.748	85.0316	79.4629	71.6913	82.778	88.3383	81.6035				20.7657	14.9114	18.4643	22.8128	17.6693	15.1868	24.3179	22.7538	19.8773	18.7016	18.9959	14.1442	27.9912	15.2119	15.4324	12.9491	17.0809
44		87	82.4	85	79.7	70	80.2	77.8	71.967	83.0518	82.7295	83.5331	83.8446	78.02	69.9177	81.4887	87.3198	80.2497				20.2258	17.1946	17.0305	25.5139	18.2841	15.77	25.4919	23.584	20.6827	18.9868	19.1988	15.3259	29.2521	15.6172	15.6884	13.7423	18.8636
46		86	81.1	84	78.4	68	78.8	76.3	70.2316	81.8223	81.4921	82.3182	82.6576	76.5771	68.1442	80.1995	86.3013	78.8958				21.7122	16.8193	16.7564	24.7516	17.4891	16.5346	26.8898	23.5842	21.431	19.6662	19.8069	15.4205	29.7456	16.1825	15.8305	13.8759	19.4676
48		85	79.9	83	77.1	66	77.5	74.8	68.4963	80.5928	80.2547	81.1032	81.4706	75.1342	66.3706	78.9102	85.2827	77.5419				20.265	18.8779	19.8009	25.4988	17.8817	17.2388	27.6923	25.6837	22.5762	19.5815	20.168	15.8332	30.3989	17.4443	16.3229	13.0145	20.3134
50		84	78.6	82	75.7	64	76.2	73.3	66.7609	79.3633	79.0173	79.8883	80.2836	73.6913	64.597	77.6209	84.2642	76.1881				20.1841	18.6805	22.4928	28.3918	18.2628	17.932	29.5314	27.0823	23.5934	21.4233	20.9088	15.9606	32.0261	18.1253	16.9472	14.1456	20.8748
52		83	77.4	81	74.4	63	74.8	71.9	65.0256	78.1337	77.7799	78.6734	79.0966	72.2484	62.8235	76.3317	83.2457	74.8342				21.6203	17.6521	24.9176	30.0963	19.0914	18.5382	29.8139	29.4565	24.3498	21.4016	22.2831	16.8463	33.8144	19.0017	16.7997	14.4384	21.9292
54		82	76.1	79	73	61	73.5	70.4	63.2902	76.9042	76.5425	77.4585	77.9096	70.8055	61.0499	75.0424	82.2272	73.4804				22.1214	19.529	24.8253	32.7207	19.8406	19.2435	31.618	30.3379	25.1818	21.9635	23.4948	17.0992	35.8538	19.3799	17.8026	15.7999	23.2141
56		81	74.8	78	71.7	59	72.2	68.9	61.5549	75.6747	75.3051	76.2436	76.7226	69.3626	59.2764	73.7531	81.2086	72.1265				22.2004	20.2175	24.9218	31.2026	20.2801	20.1131	33.6084	32.5022	26.0706	22.4389	23.2758	16.9754	39.7115	20.7958	18.6291	15.5484	23.9201
58		80	73.6	77	70.4	57	70.8	67.5	59.8195	74.4452	74.0677	75.0287	75.5356	67.9197	57.5028	72.4639	80.1901	70.7727				24.1516	19.6312	26.6118	32.2619	21.8772	21.1	35.2988	33.6621	26.697	22.4656	24.8394	16.957	40.5689	21.4076	19.5277	15.6776	24.2819
60		79	72.3	76	69	55	69.5	66	58.0842	73.2157	72.8303	73.8138	74.3485	66.4768	55.7293	71.1746	79.1716	69.4188				25.1088	19.8275	28.9284	32.8917	22.6671	22.1388	36.2716	35.218	28.5582	23.9905	25.8882	17.3548	43.0819	23.0555	19.6892	15.6889	25.8195
62		78	71.1	75	67.7	54	68.2	64.5	56.3488	71.9861	71.5929	72.5989	73.1615	65.0339	53.9557	69.8853	78.1531	68.0649				26.5114	22.9811	28.5051	34.6594	23.2353	23.4883	38.0086	36.1843	29.2549	26.9349	26.8621	17.3109	46.4996	23.6782	20.6471	15.6688	27.6332
64		77	69.8	74	66.3	52	66.8	63.1	54.6135	70.7566	70.3555	71.3839	71.9745	63.591	52.1822	68.5961	77.1345	66.7111				27.9842	22.9022	27.5184	36.2108	24.591	24.5337	40.6229	40.1909	31.4198	28.5877	28.3916	17.8825	49.7594	25.2215	21.8094	16.5976	28.2106
66		76	68.6	73	65	50	65.5	61.6	52.8781	69.5271	69.1181	70.169	70.7875	62.1481	50.4086	67.3068	76.116	65.3572				28.6707	22.7103	27.6124	35.1855	26.5282	25.5314	41.3555	41.3688	31.9507	30.2611	28.4844	18.3345	48.0622	27.4499	23.5171	17.4659	30.3536
68		75	67.3	71	63.6	48	64.2	60.1	51.1428	68.2976	67.8807	68.9541	69.6005	60.7052	48.6351	66.0175	75.0975	64.0034				31.3069	23.1171	30.2014	34.3683	25.6889	26.6536	46.0871	43.0819	33.1947	30.5812	28.8361	18.6317	51.2924	27.9519	24.3043	17.5312	30.659
70		74	66.1	70	62.3	46	62.8	58.7	49.4074	67.0681	66.6433	67.7392	68.4135	59.2623	46.8615	64.7283	74.079	62.6495				33.7503	22.4627	33.0995	34.2348	27.0079	27.828	49.3893	46.2881	33.3156	31.6545	30.8706	19.4822	55.8011	28.5005	24.4029	17.0866	30.5965
72		73	64.8	69	61	45	61.5	57.2	47.6721	65.8386	65.4059	66.5243	67.2265	57.8194	45.0879	63.439	73.0604	61.2957				34.7946	24.947	35.8375	34.5057	28.2574	29.1804	52.5237	45.8903	36.6172	33.27	30.5773	21.0767	54.8878	30.4434	26.6676	17.7874	32.9559
74		72	63.5	68	59.6	43	60.2	55.7	45.9367	64.609	64.1685	65.3094	66.0395	56.3765	43.3144	62.1497	72.0419	59.9418				36.1379	24.8218	38.9117	34.0695	29.7923	31.0999	54.4466	53.7563	39.7821	35.0167	31.24	20.6078	58.5975	32.7177	28.416	18.2494	34.0198
76		71	62.3	67	58.3	41	58.8	54.2	44.2014	63.3795	62.9311	64.0945	64.8525	54.9336	41.5408	60.8605	71.0234	58.5879				38.8546	27.9869	42.5235	33.3752	31.0727	32.7917	56.4194	53.6974	38.0984	36.4715	33.4451	22.221	63.3229	34.1908	29.2495	18.7549	35.7469
78		70	61	66	56.9	39	57.5	52.8	42.466	62.15	61.6937	62.8796	63.6655	53.4907	39.7673	59.5712	70.0049	57.2341				40.3791	26.9371	46.7684	36.1737	30.7018	34.7998	61.5956	58.0005	37.8374	38.8153	33.018	24.3232	68.2315	37.588	30.7455	19.783	37.1523
80		69	59.8	65	55.6	37	56.2	51.3	40.7307	60.9205	60.4563	61.6647	62.4785	52.0478	37.9937	58.2819	68.9863	55.8802				42.8844	32.0129	48.0051	35.9622	32.9531	37.01	61.3341	62.3653	40.1245	44.082	35.0072	24.8676	72.9632	39.6341	32.731	20.7864	39.2836
82		68	58.5	63	54.3	36	54.8	49.8	38.9954	59.691	59.2189	60.4497	61.2915	50.6049	36.2202	56.9927	67.9678	54.5264				43.9581	29.2352	49.1602	37.9398	35.1222	39.0976	65.224	64.0564	43.0507	47.0677	35.0108	24.9336	78.7546	40.4242	32.8104	20.6273	39.4775
84		67	57.3	62	52.9	34	53.5	48.4	37.26	58.4614	57.9815	59.2348	60.1045	49.162	34.4466	55.7034	66.9493	53.1725				48.8793	33.8281	49.9252	37.8374	36.4307	41.1277	69.2449	69.1899	44.6614	48.3045	37.7107	25.156	81.4698	42.5925	34.5292	21.2837	40.8383
86		66	56	61	51.6	32	52.2	46.9	35.5247	57.2319	56.7441	58.0199	58.9175	47.7191	32.6731	54.4141	65.9308	51.8186				50.7425	30.6473	51.9126	36.738	36.49	43.5918	67.1859	70.1614	47.278	50.9447	38.8561	27.012	84.3521	45.7051	36.6527	21.0281	42.0741
88		65	54.8	60	50.2	30	50.8	45.4	33.7893	56.0024	55.5067	56.805	57.7305	46.2762	30.8995	53.1249	64.9122	50.4648				52.8814	31.1514	54.4296	37.7073	36.9224	46.2323	68.7156	79.1511	48.4961	55.5458	41.4211	29.2939	89.0649	47.7609	38.8207	21.2561	42.2607
90		64	53.5	59	48.9	28	49.5	44	32.054	54.7729	54.2693	55.5901	56.5435	44.8333	29.126	51.8356	63.8937	49.1109				57.6581	34.518	55.0327	39.4354	37.986	49.106	67.1919	84.7343	51.3085	57.1209	43.0527	30.8022	90.7313	50.9219	39.7817	21.9719	44.7859
92		63	52.2	58	47.5	27	48.2	42.5	30.3186	53.5434	53.0319	54.3752	55.3565	43.3904	27.3524	50.5463	62.8752	47.7571				63.0864	36.5841	58.4286	42.446	36.3972	51.5858	68.7818	86.142	51.3294	58.56	45.3369	32.0462	95.3725	52.4099	42.6536	22.9859	46.734
94		62	51	57	46.2	25	46.8	41	28.5833	52.3139	51.7945	53.1603	54.1694	41.9475	25.5788	49.2571	61.8567	46.4032				65.6459	36.3764	60.5289	48.4737	36.4652	53.8953	73.9848	90.5996	52.3756	61.586	47.8958	34.504	102.702	56.6846	44.0633	23.3942	53.0158
96		61	49.7	55	44.9	23	45.5	39.5	26.8479	51.0843	50.5571	51.9454	52.9824	40.5046	23.8053	47.9678	60.8381	45.0494				66.2284	37.8042	65.8297	41.2471	36.5429	56.6079	75.0102	92.4932	53.0991	67.0584	49.8005	36.4626	104.215	56.4865	45.4255	23.4525	54.7639
98		59	48.5	54	43.5	21	44.2	38.1	25.1126	49.8548	49.3197	50.7304	51.7954	39.0617	22.0317	46.6785	59.8196	43.6955				72.9598	38.1883	72.9245	39.5655	38.9755	59.2776	82.9322	92.5658	54.2145	74.6754	52.7328	39.0011	100.132	62.8329	47.8581	24.8823	55.9137
100		58	47.2	53	42.2	20	42.8	36.6	23.3772	48.6253	48.0823	49.5155	50.6084	37.6188	20.2582	45.3892	58.8011	42.3416				69.8273	42.0171	73.8258	39.6951	38.8585	63.2725	90.1968	98.7904	54.4262	81.542	58.411	39.7104	106.323	65.5547	53.4697	24.4409	58.8627
																					SM	s1	s2	s3	s4	s5	s6	s8	s9	s10	s11	s12	s13	s14	s15	s16	s17	s18
																					shear modulus (kPa)	15.96	12.8944	14.8987	10.1548	12.8869	14.9397	13.2088	14.8801	11.1506	11.1609	15.0918	11.2804	16.9284	8.54035	12.4814	22.8569	11.3208
																						15.8398	12.8151	14.8153	10.0492	11.1973	14.9386	13.5044	14.7431	11.1658	10.8991	15.2293	12.545	17.0211	10.1036	12.4823	23.2945	11.3184
																						16.1024	11.6944	14.6213	9.62671	11.372	14.6784	13.4997	14.85	11.4312	10.9636	15.7297	12.7484	16.7772	9.52734	12.6086	24.9007	11.6746
																						18.1802	13.6014	14.5064	10.0591	11.7112	14.6474	13.4745	15.7052	11.9491	11.4048	15.942	12.8173	16.6664	9.67535	12.8921	24.0167	11.5979
																						18.2464	12.1837	14.8868	10.5172	10.3776	15.9061	13.5665	16.2396	11.7286	11.485	15.3152	12.7827	17.3718	10.5651	13.0749	24.2637	11.526
																						18.4393	12.4795	15.4103	10.4835	11.1384	15.5248	13.8081	15.8482	11.9115	11.6685	14.9603	12.8468	17.959	10.8842	13.0413	24.6916	12.1519
																						20.071	12.6634	16.3046	10.8397	11.6758	16.0107	14.8073	16.4893	12.3971	11.7715	15.6956	12.7447	19.7253	10.9143	13.4942	23.3226	12.363
																						21.2181	13.0852	17.0771	9.8926	12.7386	17.0528	15.4578	16.8121	12.2425	11.9005	15.8624	13.1941	19.8855	11.2375	13.901	22.3301	12.1026
																						21.2629	14.1412	17.0228	10.0163	12.8881	16.7101	15.8599	17.5844	12.5504	12.5527	16.0455	13.1704	20.42	11.8476	15.1398	21.9382	12.8035
																						22.1899	14.3103	17.6648	10.9412	12.9679	17.612	16.227	18.1428	12.445	12.3417	16.4913	13.8542	20.9895	13.0614	15.3128	22.0269	12.2004
																						24.2951	14.4913	18.5672	11.5403	13.401	18.2597	16.6225	17.9408	12.089	12.6262	17.2089	13.3024	21.383	12.7647	15.7198	24.6753	13.4637
																						25.3618	14.8134	19.1984	10.8638	13.7099	18.4906	17.093	19.2114	12.5961	13.4657	17.7579	14.0574	22.8675	12.9914	16.1672	23.8474	13.0884
																						24.6155	15.1635	19.9154	11.2922	13.6811	18.5176	17.8163	18.8761	13.3806	13.9781	17.6418	14.3815	24.2475	13.8563	16.4846	24.3022	13.2675
																						24.2939	16.568	20.5114	11.8765	13.6913	20.2957	18.7495	21.6105	13.3639	14.6217	18.0762	14.779	25.4544	14.9572	16.9425	25.7381	13.9476
																						25.9885	17.0282	21.3076	13.3449	14.2851	21.2576	19.8068	22.0574	14.1275	15.3634	19.0278	15.0629	24.7948	15.5265	17.4547	26.9172	14.1816
																						26.9668	17.9551	23.5157	12.0476	15.5882	20.6232	21.1346	23.3027	14.8022	16.2423	19.7886	15.7496	26.7526	16.2028	18.3264	28.2138	14.3868
																						27.0012	19.3499	25.6735	11.9373	15.4235	21.4916	21.4234	25.5724	15.5221	16.8273	20.4186	15.6855	28.3564	15.6969	18.9698	29.0114	14.8761
																						27.9519	21.0168	25.8635	12.8699	14.1791	22.4384	22.1749	24.9954	16.2166	17.7026	20.9297	16.0843	29.837	17.0006	20.5071	29.5029	15.0422
																						29.463	22.6575	26.5303	12.4331	13.8176	23.5462	22.9184	26.9558	16.5979	17.6621	21.9967	16.4612	31.8927	16.9257	20.7286	31.2586	15.9443
																						30.6186	22.8539	28.1593	13.1673	15.1525	25.5027	23.3807	28.3712	17.6588	18.3611	23.0649	17.2046	32.9972	17.8845	21.8494	30.1079	17.3376
																						31.3061	22.7418	29.2329	14.9504	15.4749	26.1649	24.294	27.7486	18.3165	18.7951	23.91	17.5446	34.6649	17.8109	22.3277	30.4697	17.3532
																						31.6928	22.8148	30.258	14.5538	17.1838	26.9208	24.9989	27.8478	19.1673	20.5192	25.1515	18.1622	37.285	18.8507	23.0567	30.3315	18.9677
																						31.7243	25.9442	30.8246	15.5597	16.7182	27.2162	26.2404	31.0423	20.1538	21.2374	25.9889	18.719	37.2942	19.3795	23.9372	31.7863	19.9214
																						32.1652	26.8763	32.8424	15.9775	19.2964	31.9575	27.4569	32.078	20.6169	22.0225	26.9964	19.9096	39.5165	20.1856	23.872	32.5597	20.3036
																						34.5374	27.7508	35.7219	16.5743	19.1182	32.464	28.2766	34.8013	22.0211	24.0266	27.6552	20.6497	42.9977	20.4759	24.2832	32.6179	21.3056
																						35.3699	29.6756	37.0033	16.5218	19.3834	33.2102	27.9969	34.6705	23.3684	24.2876	28.4402	21.3689	41.4959	21.7277	26.3245	33.5443	22.0026
																						35.8536	30.562	39.7723	18.3467	19.4272	33.4246	29.2843	37.0827	23.956	25.5692	29.0144	22.7345	43.9394	21.8263	25.1144	35.2015	22.5812
																						38.1086	30.4601	41.0829	18.7643	21.5872	33.7935	30.5604	39.415	24.3992	25.3789	29.1559	22.844	45.1647	22.0765	26.9001	33.6789	22.7589
																						40.4391	31.9712	41.4413	19.3669	22.9548	33.5195	31.6782	41.9153	26.0122	27.7961	30.4667	23.1138	47.9833	22.7707	28.9376	32.679	23.9838
																						40.8474	33.328	44.6483	20.3065	24.9647	36.4484	32.9009	45.7772	27.5276	28.751	31.3029	23.8737	51.0495	23.6605	30.3325	34.344	25.2167
																						40.897	35.4347	47.3024	22.5119	25.5515	35.9596	36.1091	48.3848	29.6476	29.6886	32.2412	25.0687	50.3398	25.9652	30.5861	37.4416	25.9086
																						40.4563	36.3751	46.6483	25.3805	26.2283	38.1135	39.2077	49.2796	30.2205	30.9548	32.8836	25.7632	52.9119	29.5219	31.3821	38.5314	27.1425
																						43.798	39.8244	46.3521	26.3	27.3309	37.072	40.5281	56.6025	30.9944	32.7328	34.1125	25.0525	56.9299	28.2571	33.4548	35.9775	28.4819
																						42.2231	41.1684	50.1416	26.052	29.6131	38.4567	43.5988	54.018	31.4432	34.206	35.0732	26.8545	57.4801	29.7965	33.4263	33.5729	30.0168
																						44.2285	42.4096	52.0276	28.4141	30.2228	41.6923	46.8279	55.5271	33.2927	36.2855	37.9387	27.2839	60.329	30.9158	35.1814	35.2377	31.92
																						48.1089	44.202	53.1674	29.683	32.8439	40.8378	50.3233	59.0118	33.6738	39.4933	38.5445	28.6174	63.9239	32.5209	35.682	32.7544	33.3649
																						48.8328	47.0637	52.3659	31.7007	35.7513	38.7254	52.9985	66.5757	35.0146	41.541	39.3572	31.5158	63.7587	32.7569	36.584	34.3501	36.3431
																						47.4072	50.3684	53.435	34.8893	38.9219	42.1616	56.4078	66.8483	37.0697	41.8867	39.7047	32.121	68.5349	38.0453	38.2959	37.6895	38.0002
																						47.0058	47.5487	56.2683	37.2064	35.8244	43.3559	59.0831	64.0392	38.2737	44.6428	42.4794	32.9821	55.4257	38.6395	38.2569	37.1156	42.1884
																						47.7969	48.6751	54.2281	39.57	36.4393	41.1767	63.6152	72.7958	41.4533	49.1677	43.8162	35.3921	72.7563	37.4776	40.2202	37.8105	42.2282
																						49.4394	54.2144	56.684	42.0831	37.1813	44.7073	67.2473	82.4898	40.9359	52.2214	44.81	36.299	75.4049	42.4471	41.5827	37.841	46.0413
																						49.4618	54.8572	61.4076	42.7399	41.3737	40.6048	71.8295	78.0831	42.0935	55.463	46.3676	36.7403	68.4641	41.2352	41.7174	38.3623	46.9456
																						49.7896	57.7463	60.0214	46.0683	39.182	42.8992	77.6257	93.4503	45.5544	56.8137	46.5717	38.645	80.292	45.3753	43.7057	42.3705	48.3557
																						52.0107	57.1571	59.6507	50.6117	38.3689	42.6732	76.457	90.7743	48.6774	61.0135	49.0208	38.6405	72.2733	48.9329	45.0655	42.2236	49.8735
																						54.3154	57.9969	62.9436	55.1221	40.4736	42.6701	82.7131	88.1161	48.6645	64.2515	51.0181	43.2046	74.3011	51.6265	48.2111	43.6238	51.5067
																						55.0535	60.8564	65.9135	55.9517	42.1882	41.3754	87.2079	92.2944	52.0801	66.5583	51.346	44.5968	75.1869	58.4074	49.049	45.2269	58.3808
																						55.3279	61.135	71.8151	62.027	44.2192	46.7167	92.1385	92.4715	52.4516	73.8255	52.5129	48.3026	78.9579	57.7877	49.6734	44.793	61.5231
																						55.5399	59.5128	73.5659	61.9729	43.9812	45.4697	97.839	91.5121	53.9637	81.7664	54.3191	48.9256	81.5035	61.0342	52.5658	47.3957	63.1973
																						56.1027	59.4107	81.3523	67.6823	44.301	47.6578	104.479	89.9097	56.3518	85.6573	55.7375	48.7011	71.676	65.1496	57.6238	50.2107	68.6415
																						60.5973	65.9588	84.0234	72.0552	46.3116	46.1827	106.671	94.0417	57.7354	90.7855	57.03	48.7014	75.1332	68.0221	59.0696	51.2281	70.4251
																						60.5978	66.8535	92.9721	72.875	51.1828	46.7978	111.632	93.7681	59.1167	92.4737	60.9468	49.38	76.2451	69.3825	63.9998	51.4013	69.0405
																					BF-lh	s1	s2	s3	s4	s5	s6	s8	s9	s10	s11	s12	s13	s14	s15	s16	s17	s18
																					shear modulus (kPa)	22.7834	15.5765	18.7148	14.7891	9.55302	18.3289	16.6248	25.0274	23.8798	27.9408	27.2185	15.6053	12.804	14.7082	16.415	21.4537	12.9606
																						22.783	15.5838	18.7123	13.4851	9.22872	19.1659	16.627	25.6885	23.8793	27.9408	27.2184	15.5899	12.9641	14.7075	17.251	21.4541	12.9556
																						24.2859	15.8169	19.3267	14.2571	8.70629	20.4296	17.702	26.5222	23.9217	27.5497	27.4832	15.9359	13.8053	14.5512	17.473	21.8713	12.9682
																						23.9947	16.2665	20.4494	14.6191	8.79099	20.699	19.2243	26.2745	24.4338	27.1881	28.2821	16.1944	14.6187	14.2113	17.9216	22.0858	12.8972
																						24.3102	15.6094	19.9228	15.0464	8.92934	21.8252	18.9865	25.7197	25.2067	27.6642	28.6954	15.7557	14.468	14.8595	17.4087	22.2183	13.2817
																						24.9584	17.1558	19.0261	13.403	8.5967	22.0759	18.0363	27.5641	25.528	29.4722	28.8348	15.8877	14.899	14.93	17.2463	22.6718	13.8048
																						24.7569	18.0945	19.2374	14.157	8.16934	22.2156	18.3861	25.8997	25.9461	30.4246	28.7967	16.6701	15.2293	15.5906	17.6502	23.4687	13.3812
																						24.2413	16.4518	19.326	14.0006	7.54577	23.2593	18.2944	29.4052	25.0962	32.569	28.9641	16.2979	15.6176	15.9268	17.1737	24.1457	13.9467
																						24.6546	17.534	19.7466	14.4323	7.62441	23.8916	20.0994	29.863	25.4989	33.0142	29.4779	15.9486	16.3335	16.3737	17.847	24.7071	14.4199
																						24.6362	17.5247	20.7792	14.9983	8.0465	24.857	19.9633	32.236	26.3746	32.6679	29.588	16.5778	16.9226	18.6269	18.629	25.5189	14.9878
																						24.6578	16.8744	20.9825	15.1607	8.09871	24.887	22.4291	33.3012	26.8594	33.9865	30.2377	16.8882	17.3394	19.3864	19.5415	26.0483	15.4888
																						25.2575	17.6137	22.2948	15.5405	8.56835	26.4969	23.9937	33.9655	27.2599	34.8207	30.5457	17.0388	17.9237	20.03	19.7554	26.4389	15.7808
																						24.8852	20.315	23.3296	14.7641	7.63934	27.4047	26.0516	36.049	27.235	34.8789	31.4975	17.4508	19.0862	21.0211	20.0475	27.4218	17.038
																						25.8232	20.5084	23.8437	15.6609	7.54838	28.0194	27.0042	34.2504	28.2782	36.3469	32.6997	17.6454	19.5152	22.6266	20.6992	28.5826	16.945
																						27.277	23.393	25.0985	17.7021	8.50245	29.2759	28.5523	34.2213	28.9024	38.8528	34.5157	18.0613	20.3817	24.9506	21.6549	29.411	16.9978
																						28.6642	23.0702	25.5124	17.2846	9.2212	30.8466	30.7037	36.3993	30.7783	40.6945	35.3123	18.8997	21.3227	26.1993	22.6614	30.1196	16.4488
																						30.1779	25.3087	27.8276	16.9734	9.20191	31.3368	33.8275	37.1011	30.7286	42.5554	35.929	19.0859	21.1482	28.9121	23.7156	30.7623	17.4494
																						30.9051	26.1117	29.6519	19.2638	10.2085	33.7828	34.9334	37.7291	31.5181	43.0381	36.4466	19.232	23.3201	29.9624	22.9645	31.1267	18.6456
																						30.2259	24.7203	29.4227	17.746	10.1675	33.5839	37.9625	39.1275	32.384	45.2147	37.0552	18.7918	24.198	32.8365	24.5773	32.407	18.6669
																						32.8328	27.5618	31.794	20.6052	10.3506	34.9465	41.4755	39.7185	33.1343	44.8028	37.7734	19.4676	24.3084	34.887	25.0563	33.6916	19.3786
																						32.8463	29.3504	31.6079	20.9518	11.5567	37.8819	44.7161	47.1456	34.333	44.9736	39.2302	19.5891	25.3655	37.9022	25.9203	34.3413	19.7106
																						34.6228	26.9994	33.757	20.2976	12.7308	38.6179	42.7265	44.7876	34.838	47.2608	40.6854	19.6736	25.9673	40.5129	26.8945	35.3255	20.3491
																						35.7233	31.3924	35.4338	21.2471	12.9277	39.4599	45.9434	51.0306	33.9989	49.491	40.413	20.4522	27.7122	43.5496	27.6314	36.8499	21.4951
																						36.0457	29.7619	36.342	21.8935	14.2877	41.5552	49.1932	48.4879	37.867	50.7285	41.6742	20.5314	29.501	44.7029	28.8657	37.8403	22.7795
																						37.0603	32.044	38.635	23.9022	14.8146	42.646	51.9103	51.2308	37.6657	52.4892	43.5692	21.1772	31.3169	47.7229	29.8346	38.2036	24.6576
																						38.7461	33.1989	40.729	23.8724	15.5429	44.076	51.8765	54.4158	37.6871	54.9969	45.4985	22.4622	33.7268	50.8156	30.2497	39.6331	24.9743
																						39.2379	31.4149	41.8249	24.0767	16.8737	43.7329	53.2667	56.9548	39.0191	57.2413	46.4073	22.8114	35.4143	52.7425	31.1878	39.5681	25.0543
																						39.5411	33.655	44.5392	25.394	17.61	44.9913	55.228	59.6997	41.4414	61.459	48.6459	23.6379	36.1602	56.5943	32.6861	40.6222	27.2302
																						43.0515	37.0191	44.4439	28.0922	19.4851	47.1155	59.8936	61.0179	43.2932	66.0435	49.2445	24.9026	37.2216	59.1909	33.2409	41.8438	28.0394
																						43.3589	38.1961	45.8013	27.5547	20.9052	48.2214	58.6916	60.6061	43.8931	68.4341	51.818	26.3193	38.448	61.6829	33.7063	43.3352	28.884
																						44.5556	40.4116	48.9361	28.2414	21.1126	50.2547	60.6131	65.6035	45.2828	72.0794	54.1926	26.5642	41.1061	64.7656	35.0724	44.2414	30.1982
																						45.8887	42.0103	51.7177	28.3772	22.8527	52.0815	59.0411	63.9498	47.6338	75.493	55.7712	27.4095	43.6466	67.5424	36.4831	43.9417	30.8654
																						48.1774	45.3374	51.4006	29.1215	25.1656	55.8378	63.9386	61.0506	47.6149	77.4053	57.7286	28.2472	46.2593	66.4398	37.2671	45.1036	32.078
																						50.1787	45.0148	53.0364	31.4444	27.5671	58.4244	60.5928	68.8229	49.8066	78.407	59.8641	29.3954	47.8577	71.0836	39.069	48.6711	33.3955
																						51.0469	47.4981	51.4106	33.8269	28.5126	57.6572	65.8705	71.8406	52.1286	80.0442	61.2408	31.0205	50.5787	69.3351	39.6906	49.179	35.4276
																						51.9163	49.2298	55.0637	35.322	31.2802	56.7069	65.1806	75.7587	55.6771	80.8514	64.5984	30.9951	52.7489	74.217	40.6725	53.6903	36.1281
																						52.9878	50.6422	55.0235	37.1006	29.6577	60.7184	68.5037	66.3328	59.6648	85.4474	66.4881	32.646	55.3722	74.1086	40.1188	55.7544	36.7138
																						58.3495	50.7127	56.5571	37.7916	32.0189	61.1199	68.4928	74.8423	61.0352	87.1229	68.1315	35.505	54.9832	76.4818	44.2179	55.7251	36.886
																						59.0813	55.1105	60.061	41.0149	32.6052	61.5846	74.0806	75.1103	64.4878	89.0017	71.7403	38.3473	56.0938	76.1001	43.292	54.8907	41.505
																						59.8045	58.2306	61.1364	41.424	33.5352	60.9272	76.1223	73.4045	62.6442	92.7301	73.4685	38.9606	62.3871	78.7377	43.8975	54.4837	44.0706
																						61.2466	61.7489	61.0852	41.8661	37.661	62.5471	82.6355	75.2501	67.7919	95.0154	76.0657	40.2647	64.202	82.575	45.0974	57.2727	43.9034
																						62.7408	63.0959	61.5148	40.62	39.1412	65.9233	83.5666	79.2069	68.669	94.4368	78.1009	42.3979	62.5201	82.9419	46.8034	57.7593	42.7645
																						64.9545	63.6972	61.3419	45.3807	38.378	65.0863	85.7393	87.6449	70.0504	97.0696	78.76	43.8985	68.7094	82.2012	48.6932	56.1341	45.352
																						67.678	65.8568	62.3974	47.0902	40.0482	67.5342	87.8775	86.9704	69.814	103.325	81.8188	47.2017	72.6154	81.7454	48.3235	62.4221	45.124
																						69.715	71.0244	63.8476	48.5165	40.0541	67.9307	85.6405	92.9668	71.9512	105.273	85.4063	49.5292	74.2612	84.4378	50.6502	66.8497	43.6988
																						71.7902	72.2242	66.6146	47.7323	43.4037	71.0718	89.0759	89.4219	73.7708	107.333	87.7196	51.3268	77.5972	87.0071	52.3401	66.6087	45.9748
																						75.1042	71.3113	66.8722	50.1747	43.1922	71.4878	89.2543	89.2312	73.4554	108.009	90.5852	54.5252	82.8715	86.6339	53.3103	66.4278	47.4544
																						74.5832	72.7682	67.0469	50.0382	44.9062	71.0295	92.1755	92.9336	72.9732	108.842	92.4118	58.456	84.0394	86.8617	53.9314	69.0138	46.34
																						76.1116	72.614	66.4452	51.9999	46.6123	73.8535	91.3087	95.6685	74.7392	110.602	96.4826	61.0373	85.8701	87.2196	55.0926	69.3518	51.6762
																						79.2799	75.2178	66.4593	57.9944	47.6492	73.2456	93.9362	98.0742	75.6959	120.441	97.4029	62.606	86.2221	88.3224	55.4674	69.7538	50.5968
																						75.7824	78.2125	68.3638	56.834	48.7062	74.4778	96.2441	97.0167	75.3372	129.074	102.335	63.6128	87.9398	91.9147	56.4944	70.1059	50.1499

## Sheet: interpolated_data_anova
	HF-70									HF-90									HF-110
Muscle	ST			SM			BF-lh			ST			SM			BF-lh			ST			SM			BF-lh
knee ROM	0.3	0.6	0.9	0.3	0.6	0.9	0.3	0.6	0.9	0.3	0.6	0.9	0.3	0.6	0.9	0.3	0.6	0.9	0.3	0.6	0.9	0.3	0.6	0.9	0.3	0.6	0.9
s1	5.38036	7.11113	9.78476	7.12084	9.61478	13.3583	5.65433	7.84995	9.84871	15.5598	21.9805	19.1356	10.2008	14.8949	27.6313	11.7333	15.5607	30.3442	18.1053	25.1088	57.6581	26.9668	40.897	55.0535	28.6642	44.5556	71.7902
s2	5.99307	9.15805	15.407	8.14446	11.9778	20.4852	8.11282	10.7465	18.6563	8.45529	13.2851	23.3323	7.93525	11.4801	21.9587	8.70256	17.4342	35.1807	13.2333	19.8275	34.518	17.9551	35.4347	60.8564	23.0702	40.4116	72.2242
s3	5.05554	9.29842	14.8651	6.8655	10.4157	18.7369	6.69021	10.7668	16.4001	11.7578	16.5642	28.3969	12.1459	20.9027	33.4903	12.9894	21.9235	35.6025	15.6457	28.9284	55.0327	23.5157	47.3024	65.9135	25.5124	48.9361	66.6146
s4	10.0803	15.8551	19.8441	6.42207	8.09967	18.194	5.76495	8.65667	17.3914	10.2482	14.3049	21.682	10.0739	16.3873	33.875	8.65161	14.4519	29.5861	19.7112	32.8917	39.4354	12.0476	22.5119	55.9517	17.2846	28.2414	47.7323
s5	5.87846	9.38689	15.7713	6.40914	11.4712	22.8995	7.32717	11.2692	23.1344	8.13368	14.0961	24.2877	10.81	22.8983	39.052	9.69797	17.1883	36.3568	13.5313	22.6671	37.986	15.5882	25.5515	42.1882	9.2212	21.1126	43.4037
s6	5.78356	9.2565	13.5498	6.19031	9.37654	16.7333	9.47908	11.6845	16.9326	10.5845	15.4286	24.2366	10.8038	18.7746	34.9209	13.9973	24.0764	41.2769	13.2651	22.1388	49.106	20.6232	35.9596	41.3754	30.8466	50.2547	71.0718
s8	10.8677	21.5153	33.124	11.1539	17.6864	25.8699	12.1162	15.3267	23.6654	15.144	26.5993	47.6546	13.8974	27.6348	54.8274	24.5266	46.812	68.3735	19.8106	36.2716	67.1919	21.1346	36.1091	87.2079	30.7037	60.6131	89.0759
s9	10.0275	13.8346	21.7358	12.9619	16.2757	28.9635	10.1431	15.4449	26.0919	13.4817	20.0675	44.9317	11.8524	21.144	51.2634	21.1806	27.8261	51.7031	17.7589	35.218	84.7343	23.3027	48.3848	92.2944	36.3993	65.6035	89.4219
s10	7.60292	11.1256	19.2059	8.55666	11.7161	19.7117	9.74624	17.1913	26.0966	9.20435	15.5097	31.0033	11.3506	17.097	30.0437	19.5843	29.3918	46.551	15.718	28.5582	51.3085	14.8022	29.6476	52.0801	30.7783	45.2828	73.7708
s11	8.59826	12.2422	17.9108	7.13345	10.7214	16.6788	8.65846	10.7926	15.8184	9.63604	16.8336	36.8879	15.8868	27.6927	46.0477	23.1533	45.1622	70.6347	15.0292	23.9905	57.1209	16.2423	29.6886	66.5583	40.6945	72.0794	107.333
s12	7.08796	9.31496	13.6011	10.8615	13.7584	18.4042	13.7318	15.3973	23.8818	10.9402	16.2221	24.7986	8.54245	12.6499	23.0518	23.5402	29.8935	49.6999	16.1742	25.8882	43.0527	19.7886	32.2412	51.346	35.3123	54.1926	87.7196
s13	4.99271	6.8506	10.1822	7.11199	8.9944	13.2814	10.7477	13.4228	17.5077	9.65119	13.5426	19.3091	9.76405	13.9465	23.7604	12.4826	16.0348	27.141	13.7686	17.3548	30.8022	15.7496	25.0687	44.5968	18.8997	26.5642	51.3268
s14	10.8086	15.9672	28.6734	8.69223	13.8418	24.4529	8.00069	12.4911	21.6968	12.5233	22.837	41.0073	16.196	25.4425	49.7674	15.0292	27.7209	49.2419	21.095	43.0819	90.7313	26.7526	50.3398	75.1869	21.3227	41.1061	77.5972
s15	5.57896	10.0393	16.4426	6.30995	10.7095	20.7096	6.05274	8.95074	17.2857	9.24434	15.8496	29.8879	11.201	16.5245	27.1933	14.6137	29.7833	57.8947	12.0756	23.0555	50.9219	16.2028	25.9652	58.4074	26.1993	64.7656	87.0071
s16	6.05923	6.55824	9.98671	7.28441	9.94021	12.952	3.63892	5.8397	9.669	7.34803	10.8683	17.5644	12.1559	17.404	29.3256	13.5938	19.439	30.579	12.973	19.6892	39.7817	18.3264	30.5861	49.049	22.6614	35.0724	52.3401
s17	5.85512	7.63585	9.97706	7.8894	10.6728	13.0714	8.38493	10.2116	13.8088	7.96069	10.5011	15.3113	10.6538	13.8839	21.9966	18.9506	22.1412	29.0382	12.0965	15.6889	21.9719	28.2138	37.4416	45.2269	30.1196	44.2414	66.6087
s18	4.39334	6.10307	9.55301	8.85887	10.185	15.664	6.06756	8.81376	14.2183	8.67828	13.4067	20.4601	9.96955	18.0098	34.7217	11.528	19.848	34.9539	14.1679	25.8195	44.7859	14.3868	25.9086	58.3808	16.4488	30.1982	45.9748

## Sheet: end_stretch_anova
muscle	ST			SM			BF-lh
hip flexion	HF-70	HF-90	HF-110	HF-70	HF-90	HF-110	HF-70	HF-90	HF-110
s1	25.934	36.823	69.8273	49.2188	54.2617	60.5978	22.6963	45.0572	75.7824
s2	24.7552	38.1974	42.0171	34.2478	39.9085	66.8535	38.9855	65.853	78.2125
s3	26.1823	49.1592	73.8258	40.7219	80.3878	92.9721	31.0853	50.1674	68.3638
s4	25.3259	36.3798	39.6951	38.8081	58.6508	72.875	26.4732	49.1177	56.834
s5	18.13	25.7694	38.8585	26.8531	44.0263	51.1828	29.7428	43.2471	48.7062
s6	22.1114	35.2239	63.2725	24.9578	57.0902	46.7978	29.2735	60.1837	74.4778
s8	47.4208	63.1261	90.1968	47.45	88.553	111.632	26.0498	85.8808	96.2441
s9	28.3381	74.0169	98.7904	42.3237	80.5463	93.7681	30.207	56.7574	97.0167
s10	51.0317	53.1878	54.4262	55.3008	51.4945	59.1167	49.4353	61.7513	75.3372
s11	42.0326	57.6362	81.542	45.4005	80.9831	92.4737	50.5765	79.103	129.074
s12	25.844	49.3755	58.411	43.2252	57.3297	60.9468	47.6239	89.8765	102.335
s13	27.7459	41.1615	39.7104	43.7996	46.4228	49.38	40.0645	49.376	63.6128
s14	54.7142	96.0528	106.323	49.5483	84.3671	76.2451	42.9359	70.3351	87.9398
s15	25.193	35.7007	65.5547	23.9829	38.296	69.3825	20.1801	65.8995	91.9147
s16	28.1259	29.8321	53.4697	27.3572	57.3132	63.9998	25.8193	47.1492	56.4944
s17	22.1956	24.5658	24.4409	31.3852	40.7432	51.4013	23.4538	39.2667	70.1059
s18	20.1118	32.2229	58.8627	26.4017	69.0243	69.0405	30.7944	47.2558	50.1499
