# Supplementary material for: Elastography Study of Hamstring Behaviors during Passive Stretching
Source: PLoS One. 2015 Sep 29;10(9):e0139272. doi: 10.1371/journal.pone.0139272 (PMC4587804; doi:10.1371/journal.pone.0139272)
Supplement: S2 File — (HF-70: hip flexed at 70°, HF-90: hip flexed at 90°, HF-110: hip flexed at 110). (XLSX) [file pone.0139272.s002.xlsx]

## Sheet: ST_reliability
ST	s1					s2					s3					s4					s6					s7					s8					s9					s10					s11
knee ROM(%)	knee ROM (°)	trial 1 (shear modulus, kPa)	trial 2 (shear modulus, kPa)	trial 3 (shear modulus, kPa)		knee ROM (°)	trial 1 (shear modulus, kPa)	trial 2 (shear modulus, kPa)	trial 3 (shear modulus, kPa)		knee ROM (°)	trial 1 (shear modulus, kPa)	trial 2 (shear modulus, kPa)	trial 3 (shear modulus, kPa)		knee ROM (°)	trial 1 (shear modulus, kPa)	trial 2 (shear modulus, kPa)	trial 3 (shear modulus, kPa)		knee ROM (°)	trial 1 (shear modulus, kPa)	trial 2 (shear modulus, kPa)	trial 3 (shear modulus, kPa)		knee ROM (°)	trial 1 (shear modulus, kPa)	trial 2 (shear modulus, kPa)	trial 3 (shear modulus, kPa)		knee ROM (°)	trial 1 (shear modulus, kPa)	trial 2 (shear modulus, kPa)	trial 3 (shear modulus, kPa)		knee ROM (°)	trial 1 (shear modulus, kPa)	trial 2 (shear modulus, kPa)	trial 3 (shear modulus, kPa)		knee ROM (°)	trial 1 (shear modulus, kPa)	trial 2 (shear modulus, kPa)	trial 3 (shear modulus, kPa)		knee ROM (°)	trial 1 (shear modulus, kPa)	trial 2 (shear modulus, kPa)	trial 3 (shear modulus, kPa)
0	-20.7083	4.48189	4.77942	4.12691		-19.4531	4.75331	2.98368	3.40537		-20.3468	6.20241	5.70089	8.65726		-19.5835	4.80353	4.57687	4.2979		-19.5408	6.70397	5.35804	6.18411		-20.2214	3.52379	4.00614	4.15154		-19.0137	4.24532	3.61349	3.60403		-19.0666	5.75097	6.27621	7.28843		-19.8153	7.70302	5.25455	6.95243		-19.9591	8.43466	7.67617	6.79467
2	-19.2812	4.8081	4.91949	4.27295		-17.9055	4.94343	2.95528	3.69834		-18.9924	6.49494	5.6852	8.28609		-18.3203	4.94274	4.74148	4.31485		-17.9339	6.96778	6.21534	6.2379		-18.3898	3.97602	5.29464	5.024		-17.3596	4.87011	3.83587	3.78334		-17.6827	5.88442	6.48223	7.36264		-18.1038	7.4444	5.6823	7.58421		-18.3934	8.66474	7.85012	7.45211
4	-17.8541	5.20018	4.94938	4.488		-16.3578	4.66285	3.14026	4.17688		-17.638	6.64352	6.11142	9.39416		-17.0571	5.20082	5.07408	4.50745		-16.3271	7.2128	6.47905	6.51574		-16.5581	4.64123	5.49177	5.39365		-15.7054	5.08843	3.85266	4.14406		-16.2988	6.04579	6.7608	7.55358		-16.3922	8.30356	6.51043	7.48187		-16.8278	9.74165	7.85217	6.22438
6	-16.427	5.46518	5.05114	4.74407		-14.8102	4.55004	2.8709	3.98927		-16.2836	6.65684	6.07358	9.1355		-15.7939	5.2754	5.16285	4.85783		-14.7202	7.2617	6.51515	6.7876		-14.7265	4.80284	5.29291	4.67027		-14.0512	4.46397	4.29091	3.75343		-14.915	6.24139	6.87782	7.71172		-14.6807	8.38825	6.40277	8.25817		-15.2621	9.12212	8.2966	6.16113
8	-14.9999	5.56976	5.19685	5.06091		-13.2626	5.18704	2.78734	3.71797		-14.9292	7.02279	5.82168	8.72967		-14.5307	5.19633	5.53393	5.10633		-13.1134	7.36788	6.62999	7.07257		-12.8949	5.0822	5.78716	5.26078		-12.397	5.63707	4.5876	3.60568		-13.5311	6.3955	6.90271	7.82583		-12.9691	9.05656	7.07983	8.95186		-13.6964	9.84586	8.35576	6.38457
10	-13.5728	5.63037	5.38369	5.13566		-11.715	5.60842	2.90611	3.7792		-13.5749	7.22142	5.79245	7.99479		-13.2675	5.34861	5.55135	5.32846		-11.5066	7.61749	6.9972	7.16893		-11.0632	4.8581	5.80588	5.2119		-10.7429	5.92671	4.78434	4.30153		-12.1472	6.40921	6.99691	7.93068		-11.2576	8.52378	7.19337	7.21522		-12.1307	9.37284	8.83511	6.87106
12	-12.1457	5.8348	5.58088	5.2133		-10.1673	5.20582	3.06673	4.17577		-12.2205	7.2224	6.22116	11.2539		-12.0043	5.46719	5.5357	5.43021		-9.89974	7.69713	7.25974	7.327		-9.2316	5.39429	6.18267	5.09313		-9.08869	5.83836	4.8996	4.68259		-10.7634	6.65336	6.69132	8.06828		-9.54602	8.68589	7.50256	7.20437		-10.5651	9.82356	8.70001	8.74472
14	-10.7187	6.16251	5.75162	5.27443		-8.61971	5.41372	3.45619	5.11144		-10.8661	7.16906	6.66269	7.36838		-10.7411	5.51888	5.6031	5.7369		-8.2929	7.76591	7.96188	7.81779		-7.39996	5.46188	6.32853	5.16354		-7.43451	7.20703	6.75564	5.261		-9.3795	7.35789	6.3742	8.21907		-7.83447	9.68007	6.88891	7.18916		-8.9994	9.23202	9.05713	6.90997
16	-9.29156	6.30471	5.79647	5.25881		-7.07208	5.28811	3.4378	5.37276		-9.51167	7.09676	7.6581	8.96824		-9.47792	5.6209	5.94975	6.21912		-6.68606	8.0974	8.17526	7.26455		-5.56832	5.89667	6.25482	5.67463		-5.78034	8.59079	6.99587	5.87524		-7.99563	7.44063	6.44648	8.30837		-6.12292	9.92099	7.16791	6.81241		-7.43373	7.45508	9.59069	7.4653
18	-7.86447	6.51928	6.30842	5.27008		-5.52446	5.27741	3.64992	5.55432		-8.15728	7.86584	8.00832	10.1975		-8.21473	5.94358	6.56985	6.66649		-5.07923	8.18621	8.29478	7.49509		-3.73668	6.01426	6.54602	5.77429		-4.12616	7.59936	7.21312	6.01395		-6.61176	8.17887	6.50184	8.38291		-4.41137	10.804	7.738	7.66125		-5.86806	9.8268	9.14209	7.51373
20	-6.43738	6.72831	6.38595	5.22302		-3.97684	5.47123	4.18119	5.96362		-6.80288	7.61118	8.62936	9.53789		-6.95153	6.36388	7.74838	7.82541		-3.47239	8.3737	8.64896	7.91199		-1.90504	5.97998	6.88709	6.86687		-2.47199	7.54916	7.27341	6.22098		-5.22789	8.32563	6.59798	8.35448		-2.69983	11.0172	8.14926	8.19187		-4.30239	9.45171	9.44646	8.3702
22	-5.01029	6.88681	6.60338	5.11532		-2.42921	5.44939	4.42164	6.32107		-5.44849	8.26361	8.91909	10.8563		-5.68834	7.06339	8.30431	8.53057		-1.86555	8.92174	9.06672	8.16574		-0.0734066	6.52578	6.6755	7.62577		-0.817813	8.48191	7.55681	6.3857		-3.84403	8.26263	6.74739	8.24264		-0.988278	10.5142	7.15679	8.67727		-2.73672	9.04104	9.26423	11.0484
24	-3.58319	7.12752	6.98192	5.31753		-0.881586	6.29202	4.71611	6.56798		-4.09409	8.37873	8.98887	10.911		-4.42515	7.36947	8.46248	8.97469		-0.258716	9.3751	9.5465	8.33556		1.75823	6.70132	7.60176	7.40949		0.836362	9.0077	7.80063	6.59402		-2.46016	8.12307	7.133	8.2097		0.72327	10.8022	9.30063	9.03167		-1.17105	9.52585	8.7761	10.7287
26	-2.1561	7.53282	7.24006	5.475		0.666039	6.52964	4.61388	6.75454		-2.7397	9.1479	9.04422	10.7432		-3.16195	7.48995	8.78231	9.13231		1.34812	9.69725	10.0467	8.83044		3.58987	6.96698	7.8253	7.08197		2.49054	9.48772	8.17315	6.63485		-1.07629	8.10584	7.70551	8.25411		2.43482	12.101	8.94	9.32598		0.394618	11.016	9.08341	10.7944
28	-0.729009	7.83741	7.65229	5.56849		2.21366	6.57086	5.01719	6.61605		-1.3853	9.62578	9.42904	10.3318		-1.89876	7.55902	9.1853	9.56563		2.95496	9.91408	10.5279	9.07835		5.42151	8.72124	8.17487	8.01379		4.14471	10.0037	8.65318	6.61707		0.30758	8.41933	7.93205	8.87338		4.14637	12.1847	9.13219	9.86817		1.96029	11.2824	9.22562	11.4591
30	0.698083	8.20119	8.15155	5.80915		3.76129	6.38158	5.49149	6.7595		-0.0309098	9.93704	10.2785	11.244		-0.635566	7.58573	9.54534	10.0325		4.56179	10.3499	10.9159	9.57656		7.25314	8.17936	8.97434	7.5393		5.79889	9.78489	8.90807	7.00866		1.69145	8.67408	7.86802	9.4415		5.85791	12.5051	10.5846	10.5569		3.52596	13.0105	9.5485	11.0213
32	2.12518	8.47168	8.35765	6.15895		5.30891	6.47289	5.77493	6.51641		1.32348	9.75613	9.73714	11.7141		0.627628	7.85916	10.0736	10.3583		6.16863	10.8761	11.5286	10.3856		9.08478	9.52088	9.92787	8.95779		7.45306	11.0023	7.53229	7.37732		3.07532	8.98022	8.12316	10.3863		7.56946	12.6983	10.4018	10.9674		5.09163	13.6346	10.1947	10.4731
34	3.55227	8.73595	8.63398	6.58662		6.85654	6.2959	5.49755	7.00623		2.67788	10.7364	10.4103	11.8319		1.89082	8.2993	10.6308	10.3272		7.77547	11.36	11.7439	10.7895		10.9164	9.05345	10.2576	8.68889		9.10724	10.9784	7.85804	8.18144		4.45919	9.37066	9.16572	11.4019		9.28101	12.9939	11.16	11.4488		6.6573	15.5989	10.6534	11.4031
36	4.97936	8.98905	8.87777	7.00862		8.40416	6.35969	5.34655	7.48536		4.03227	11.035	10.6426	11.9898		3.15402	8.66856	10.9008	10.4604		9.38231	12.0698	12.2262	11.144		12.7481	8.90945	10.6664	9.0423		10.7614	11.4641	8.14925	8.42465		5.84305	9.26078	9.56947	12.3484		10.9926	13.02	12.3492	11.7858		8.22297	16.9973	11.2333	11.0132
38	6.40645	9.50071	9.21135	7.38099		9.95179	6.12047	5.19742	7.2273		5.38667	11.627	11.9984	12.332		4.41721	8.97863	11.2425	10.5079		10.9891	12.5727	13.006	11.4646		14.5797	10.9193	11.0742	9.95639		12.4156	12.2587	8.33596	8.35869		7.22692	10.0621	9.713	13.2514		12.7041	13.617	12.8364	12.6227		9.78864	17.1918	11.4289	10.8572
40	7.83354	10.0459	9.47818	7.91275		11.4994	6.21556	5.01655	7.38092		6.74106	12.2173	11.8758	12.9101		5.6804	8.95701	11.1629	10.6751		12.596	13.1276	13.4934	11.8127		16.4113	10.7737	11.5359	10.489		14.0698	12.1626	9.09356	9.12221		8.61079	10.4063	10.1352	13.4554		14.4157	13.5758	14.1666	12.745		11.3543	18.0953	12.5266	11.1935
42	9.26064	10.4243	9.83943	8.1364		13.047	6.55428	5.40761	7.68112		8.09546	12.0328	12.645	13.0905		6.9436	9.2413	11.3206	9.68736		14.2028	13.7431	14.0239	12.2991		18.243	11.3489	12.1003	10.5707		15.7239	12.2205	10.001	10.5952		9.99466	10.5569	10.6038	13.3504		16.1272	14.7308	14.8454	13.9028		12.92	20.3047	13.1895	13.1571
44	10.6877	10.8375	10.1437	8.23053		14.5947	8.39854	6.31373	7.70042		9.44985	12.7733	12.9197	13.5952		8.20679	10.0932	12.0699	9.91845		15.8097	14.4865	14.4216	12.5366		20.0746	11.3556	12.6628	12.5564		17.3781	13.06	10.8127	11.2868		11.3785	10.5353	11.0003	13.1274		17.8388	14.8623	15.7095	14.0937		14.4856	20.8106	13.9329	14.1214
46	12.1148	11.1517	10.5399	8.43451		16.1423	7.58966	6.88379	7.89569		10.8042	13.1239	12.7824	14.2119		9.46998	10.3771	12.3409	10.8009		17.4165	14.9753	15.2621	12.5065		21.9062	12.1604	13.0977	13.0099		19.0323	13.7522	11.3244	12.7928		12.7624	10.6417	11.6627	13.0294		19.5503	14.716	15.4614	14.2776		16.0513	19.7095	15.4707	14.6723
48	13.5419	11.6106	11.2287	8.82478		17.6899	9.08243	7.12499	8.14278		12.1586	14.0861	13.2916	14.5327		10.7332	11.0252	12.702	11.4987		19.0233	15.3475	15.7313	12.8373		23.7379	13.0489	14.1363	13.3019		20.6865	12.2936	12.5963	12.7176		14.1463	10.8389	12.128	12.8836		21.2618	16.973	18.154	15.3104		17.617	18.928	15.759	16.0311
50	14.969	11.9433	11.6536	9.39523		19.2375	9.27926	7.72885	8.64912		13.513	14.6547	13.9786	15.1982		11.9964	11.5425	12.9789	11.9894		20.6302	15.4799	16.341	12.6972		25.5695	12.6472	13.927	14.3575		22.3406	12.904	12.3563	12.7101		15.5301	11.1736	12.6229	12.9175		22.9734	16.9196	18.2563	16.3787		19.1827	21.1168	16.6272	16.1547
52	16.3961	12.3073	12.1924	10.0542		20.7852	6.94703	8.53065	8.73839		14.8674	15.2733	14.2841	15.3959		13.2596	11.5365	13.3065	12.3616		22.237	15.8455	17.1514	13.2582		27.4012	14.507	14.7332	15.0364		23.9948	14.3161	13.6804	13.7117		16.914	11.6597	12.8033	13.5553		24.6849	16.8412	17.2117	16.6136		20.7483	22.555	17.5576	16.3418
54	17.8232	12.9043	12.5617	10.7161		22.3328	6.92506	9.08571	9.44318		16.2218	15.2155	13.8118	15.9768		14.5228	11.9439	13.5192	12.7622		23.8438	16.4241	17.2674	14.0254		29.2328	14.128	15.0719	15.6805		25.649	15.3254	14.2392	14.5215		18.2979	12.1474	13.5675	14.746		26.3965	17.7986	18.643	16.8844		22.314	22.0545	18.1368	16.5336
56	19.2503	13.4649	12.8314	11.2256		23.8804	7.87874	9.11492	10.8236		17.5762	16.0881	14.8051	16.5403		15.786	12.0875	13.9467	13.3469		25.4507	17.0239	17.5562	14.7028		31.0644	15.0032	15.6159	16.0911		27.3032	16.39	14.3497	15.6971		19.6817	12.1814	14.4844	15.1831		28.108	17.7453	19.6228	17.925		23.8797	19.3844	20.0374	17.5862
58	20.6774	14.1283	12.4926	11.7192		25.428	8.37074	8.54843	11.4596		18.9306	15.9411	17.2039	16.6931		17.0491	12.6038	14.2589	13.6942		27.0575	17.8651	17.9352	15.4857		32.8961	16.3141	15.9069	17.3128		28.9573	16.6957	16.0761	16.9886		21.0656	13.0502	14.992	16.2236		29.8196	17.5696	21.0483	18.1409		25.4453	19.7245	19.129	15.2291
60	22.1045	14.9213	13.2314	12.3766		26.9757	9.32947	8.87948	11.7012		20.285	17.5894	16.1347	17.9499		18.3123	12.8126	14.455	13.8389		28.6643	18.4659	18.2001	16.0868		34.7277	15.8017	16.8889	17.2688		30.6115	17.2803	17.0601	17.115		22.4495	13.6452	15.0911	16.9894		31.5311	20.0255	22.5678	18.6326		27.011	20.1579	20.3942	15.9806
62	23.5316	15.6343	13.954	13.1225		28.5233	9.85917	9.11698	11.6794		21.6394	17.4029	15.8536	18.7756		19.5755	13.2002	14.8376	14.7111		30.2712	19.6333	19.0778	16.1465		36.5594	16.6343	17.9652	18.2985		32.2657	18.2495	17.0355	17.8065		23.8333	14.4445	15.387	17.9838		33.2427	20.63	24.2743	19.0234		28.5767	22.3295	22.1977	17.1949
64	24.9587	15.9299	14.3838	13.7929		30.0709	10.02	10.3412	11.9362		22.9938	18.7007	17.016	20.3588		20.8387	13.4548	15.0357	15.1153		31.878	20.4326	19.4305	16.8889		38.391	17.6638	18.9416	19.8086		33.9199	19.4029	18.0687	19.9568		25.2172	15.2313	15.7596	18.3959		34.9542	21.1924	22.3027	21.4581		30.1424	22.1481	22.3551	18.6644
66	26.3857	16.0819	14.9135	14.4614		31.6185	10.582	11.1593	12.0442		24.3482	19.8491	17.7713	19.3882		22.1019	14.744	15.5155	15.6624		33.4849	20.6286	19.255	18.5176		40.2226	16.927	19.8245	20.728		35.574	19.9386	20.049	20.8559		26.6011	15.8911	16.3921	18.8891		36.6658	22.8843	22.864	21.0047		31.708	23.921	26.2616	18.2809
68	27.8128	16.3141	15.6014	14.9455		33.1662	10.5445	11.8176	12.2907		25.7026	20.8255	17.4941	18.9398		23.3651	15.2238	16.1624	16.3206		35.0917	21.777	19.9745	18.8599		42.0543	18.039	20.9191	21.1851		37.2282	20.8367	21.4855	21.866		27.985	16.5034	17.0093	19.2033		38.3773	23.5691	24.692	21.8001		33.2737	25.6238	23.6921	20.9305
70	29.2399	16.5135	15.9556	15.4551		34.7138	11.4127	11.963	13.3875		27.057	21.6537	17.9762	19.0551		24.6283	15.3607	17.2153	16.9305		36.6985	22.8837	20.6428	19.8892		43.8859	18.9385	21.44	21.2489		38.8824	20.8437	22.9811	22.129		29.3688	16.9333	17.5506	19.3921		40.0889	24.8376	25.3806	23.9973		34.8394	23.9125	24.2203	21.4801
72	30.667	16.7416	16.0226	16.3091		36.2614	10.4621	12.6344	13.9907		28.4114	21.079	20.5688	20.8001		25.8915	16.2551	17.8774	17.6378		38.3054	23.3666	21.8093	20.2252		45.7175	19.0647	22.5268	22.687		40.5366	22.4791	23.9327	23.0642		30.7527	17.402	18.3515	20.2352		41.8004	25.4348	26.0169	24.9629		36.405	25.4061	26.0776	20.8801
74	32.0941	17.0948	15.8745	16.5535		37.809	11.6586	13.3834	14.5155		29.7658	21.3574	20.8381	21.7107		27.1547	17.6777	18.7453	18.6369		39.9122	23.9524	22.9841	21.0252		47.5492	18.5095	23.6347	23.3768		42.1907	23.6771	24.4199	23.9797		32.1366	17.5215	19.249	22.0099		43.512	25.4201	27.8204	26.5828		37.9707	29.3382	25.663	20.2282
76	33.5212	17.2628	15.5809	17.2398		39.3567	13.0334	14.0007	15.255		31.1202	21.7152	20.7126	22.3753		28.4179	18.4831	19.4891	19.6959		41.519	24.5088	23.4342	22.0683		49.3808	19.0751	23.6979	24.0317		43.8449	25.6861	25.453	25.5249		33.5204	18.2107	19.5097	23.4563		45.2235	28.5929	29.3031	28.6231		39.5364	28.3707	27.4608	21.4209
78	34.9483	17.3712	15.846	17.5554		40.9043	11.724	14.7822	16.3598		32.4746	23.382	22.1566	23.8002		29.6811	19.4288	20.0981	20.205		43.1259	25.318	23.3294	22.3528		51.2125	21.7085	25.7371	25.5784		45.4991	26.0771	25.6969	27.2031		34.9043	18.608	19.4252	24.0713		46.9351	29.9527	28.2491	31.1952		41.102	28.759	29.2324	24.6623
80	36.3754	17.4442	16.0851	17.956		42.4519	12.1659	16.072	16.273		33.829	24.4663	21.4744	23.8087		30.9443	20.3458	20.254	20.623		44.7327	25.8244	24.5965	22.4798		53.0441	20.5667	25.9456	25.6914		47.1533	27.5999	27.0666	27.349		36.2882	19.615	19.4056	24.4739		48.6466	33.0538	33.2872	32.6024		42.6677	30.0602	28.7579	23.8777
82	37.8025	17.7698	16.1546	18.6829		43.9995	11.1891	16.5036	16.1516		35.1833	26.4244	22.7188	24.0019		32.2075	21.0419	20.3664	21.5235		46.3396	27.0618	26.8056	24.0494		54.8757	21.0214	26.3561	26.1396		48.8074	29.9047	27.4428	30.2035		37.672	21.3295	20.0526	25.3262		50.3582	33.9646	34.4408	34.0537		44.2334	30.7519	32.1339	25.076
84	39.2296	18.0103	16.2989	18.653		45.5472	10.5371	17.1532	16.373		36.5377	27.3492	21.8657	26.0047		33.4707	21.0479	20.9815	23.1518		47.9464	27.7031	28.7694	24.8261		56.7074	22.0576	27.2317	27.2691		50.4616	31.9507	30.3088	31.6497		39.0559	22.0501	20.8137	25.7873		52.0697	36.8084	34.7967	37.056		45.7991	30.9515	33.2116	29.7303
86	40.6567	18.2935	16.3273	19.3018		47.0948	12.6875	18.7353	16.3376		37.8921	26.2023	21.7445	27.5443		34.7339	21.7595	21.5189	25.1042		49.5532	27.9363	29.3535	25.62		58.539	20.9012	28.2324	27.2474		52.1158	32.9118	31.2541	32.0328		40.4398	22.9787	21.6756	26.7625		53.7813	38.2575	36.2016	40.4874		47.3647	33.1936	35.0785	28.4519
88	42.0838	18.9271	16.0731	19.4033		48.6424	13.5212	19.9044	18.1336		39.2465	27.5016	21.5588	27.8534		35.9971	22.4587	22.1713	25.9961		51.1601	29.1328	32.3897	27.2696		60.3706	21.7047	29.763	29.5843		53.77	31.3093	33.078	34.4542		41.8236	23.4236	23.311	27.1493		55.4928	37.8426	40.8872	42.1966		48.9304	33.268	35.5713	30.3907
90	43.5109	19.7342	15.929	19.7096		50.19	14.6604	20.3843	18.5708		40.6009	29.3628	25.1328	29.1837		37.2602	23.2816	21.9302	26.6345		52.7669	30.8028	33.4434	29.5841		62.2023	21.5051	29.574	32.8433		55.4241	32.3504	35.327	35.9547		43.2075	23.2162	24.3975	27.5152		57.2044	41.5197	44.1059	43.174		50.4961	36.9239	34.0152	30.9893
92	44.9379	19.9522	16.0376	20.4339		51.7377	14.5145	21.093	17.5055		41.9553	29.4353	25.4198	30.5561		38.5234	23.5556	22.5429	26.7223		54.3737	31.6128	34.739	31.4119		64.0339	22.3777	30.2662	33.3922		57.0783	34.2878	35.0767	38.9332		44.5914	23.3461	25.0419	27.5478		58.9159	40.4245	45.6533	45.1615		52.0617	38.9402	34.3533	33.3507
94	46.365	20.792	16.5475	20.2626		53.2853	13.6551	23.7817	19.0201		43.3097	33.0887	26.9524	31.2093		39.7866	24.1825	22.8615	26.8112		55.9806	32.7228	35.7389	32.8687		65.8656	21.9139	31.6698	31.8962		58.7325	37.9695	38.776	40.1216		45.9752	23.0974	25.9114	27.01		60.6275	39.8376	44.8705	46.0663		53.6274	40.2779	34.3051	32.0115
96	47.7921	21.206	17.0884	21.3549		54.8329	14.6754	25.242	21.2148		44.6641	33.508	28.6392	30.9397		41.0498	24.6052	23.2212	26.7221		57.5874	33.1379	37.1534	34.4564		67.6972	20.9685	29.2654	34.9488		60.3867	37.8552	40.016	40.9727		47.3591	24.0119	26.1037	27.299		62.339	45.5353	46.6399	50.0105		55.1931	38.176	34.6069	30.9718
98	49.2192	21.2364	16.7072	22.2046		56.3805	14.7448	25.9815	22.1584		46.0185	38.2807	29.6057	31.2268		42.313	24.9261	23.8809	27.061		59.1942	34.0109	36.9006	36.5632		69.5288	22.6499	32.9565	34.7512		62.0408	39.142	43.6333	44.2543		48.743	24.4439	26.5271	27.9519		64.0505	47.7846	51.2505	52.2467		56.7587	40.018	34.6739	33.5546
100	50.6463	21.3861	16.5903	22.586		57.9282	14.8647	26.5487	20.6525		47.3729	37.8047	29.8274	29.6869		43.5762	26.1181	24.2688	28.3399		60.8011	36.2916	37.5797	38.999		71.3605	21.1204	32.2743	38.7095		63.695	36.9582	44.5792	46.8155		50.1269	24.7127	26.5489	28.8132		65.7621	48.5472	51.8654	48.9688		58.3244	45.4006	34.7394	33.0517

## Sheet: SM_reliability
SM	s1					s2					s3					s4					s6					s7					s8					s9					s10					s11
knee ROM(%)	knee ROM (°)	trial 1 (shear modulus, kPa)	trial 2 (shear modulus, kPa)	trial 3 (shear modulus, kPa)		knee ROM (°)	trial 1 (shear modulus, kPa)	trial 2 (shear modulus, kPa)	trial 3 (shear modulus, kPa)		knee ROM (°)	trial 1 (shear modulus, kPa)	trial 2 (shear modulus, kPa)	trial 3 (shear modulus, kPa)		knee ROM (°)	trial 1 (shear modulus, kPa)	trial 2 (shear modulus, kPa)	trial 3 (shear modulus, kPa)		knee ROM (°)	trial 1 (shear modulus, kPa)	trial 2 (shear modulus, kPa)	trial 3 (shear modulus, kPa)		knee ROM (°)	trial 1 (shear modulus, kPa)	trial 2 (shear modulus, kPa)	trial 3 (shear modulus, kPa)		knee ROM (°)	trial 1 (shear modulus, kPa)	trial 2 (shear modulus, kPa)	trial 3 (shear modulus, kPa)		knee ROM (°)	trial 1 (shear modulus, kPa)	trial 2 (shear modulus, kPa)	trial 3 (shear modulus, kPa)		knee ROM (°)	trial 1 (shear modulus, kPa)	trial 2 (shear modulus, kPa)	trial 3 (shear modulus, kPa)		knee ROM (°)	trial 1 (shear modulus, kPa)	trial 2 (shear modulus, kPa)	trial 3 (shear modulus, kPa)
0	-20.7083	6.77656	4.83032	5.76998		-19.4531	5.87279	5.53363	7.68762		-20.3468	6.63304	6.24234	5.33323		-19.5835	6.12026	6.81809	6.85381		-19.5408	6.09509	7.47899	6.36918		-20.2214	5.99972	4.69313	5.02488		-19.0137	5.57587	5.56366	4.70311		-19.0666	8.7002	6.20346	6.01001		-19.8153	5.74507	6.15537	6.19847		-19.9591	4.70502	8.02795	5.72433
2	-19.2812	6.92734	4.95558	5.80544		-17.9055	6.23542	6.16933	7.77293		-18.9924	7.14361	6.00725	5.31201		-18.3203	6.11475	7.19623	7.3608		-17.9339	6.74353	7.94244	6.82093		-18.3898	6.29822	5.15277	5.29272		-17.3596	6.0209	6.22123	4.81248		-17.6827	8.73534	6.46449	6.18911		-18.1038	6.44746	7.20834	6.99695		-18.3934	5.69127	8.02784	6.26561
4	-17.8541	7.02565	5.12109	5.80499		-16.3578	6.58836	6.45958	7.8196		-17.638	7.60026	6.57799	5.51582		-17.0571	6.0969	7.45886	7.65895		-16.3271	7.12488	8.23418	7.00286		-16.5581	6.42424	5.29504	5.58544		-15.7054	6.44601	6.50802	4.91867		-16.2988	8.92711	6.77715	6.36443		-16.3922	6.54801	7.034	7.50884		-16.8278	6.32083	8.10318	6.28206
6	-16.427	7.27628	5.29478	5.76478		-14.8102	6.87711	6.55295	8.00151		-16.2836	7.18039	6.76099	5.60341		-15.7939	6.04165	7.42942	7.66955		-14.7202	7.23899	8.318	7.00913		-14.7265	5.88467	5.36297	5.6356		-14.0512	6.05144	6.16923	5.45816		-14.915	9.11266	7.04741	6.5075		-14.6807	6.53921	7.7582	7.78996		-15.2621	6.64593	8.96917	6.79424
8	-14.9999	7.22928	5.56956	5.78652		-13.2626	6.79011	6.72923	8.15502		-14.9292	7.69379	6.73893	5.72473		-14.5307	6.01591	7.60822	7.65177		-13.1134	7.28451	8.6868	7.27075		-12.8949	6.1181	5.79565	6.6325		-12.397	6.13819	6.24282	4.79968		-13.5311	9.21645	7.15456	6.62325		-12.9691	7.02866	7.97963	7.53452		-13.6964	6.82835	9.75999	6.75442
10	-13.5728	7.29689	5.76241	5.88587		-11.715	6.74402	6.8325	8.44024		-13.5749	7.85785	6.47051	6.15345		-13.2675	6.11023	7.85972	7.77255		-11.5066	7.46698	8.83431	7.44222		-11.0632	6.54985	5.78076	6.0928		-10.7429	5.9778	6.21623	4.82064		-12.1472	9.40967	7.14494	6.75588		-11.2576	6.89221	7.58933	7.38661		-12.1307	6.30776	10.2698	7.23401
12	-12.1457	7.56587	6.89735	5.98548		-10.1673	6.75018	7.09551	8.70707		-12.2205	7.98026	6.58153	6.23773		-12.0043	6.36243	8.10753	7.98527		-9.89974	8.40314	9.62344	7.63022		-9.2316	7.55061	6.02108	7.15323		-9.08869	6.63206	6.49643	4.60051		-10.7634	9.45913	7.26512	6.88655		-9.54602	7.01369	7.52077	7.95074		-10.5651	5.85794	10.4845	7.37659
14	-10.7187	7.37764	6.97558	6.20243		-8.61971	6.94908	7.82845	9.33543		-10.8661	8.44901	6.93765	6.53944		-10.7411	6.48695	8.43907	8.32311		-8.2929	8.66694	9.66968	8.36097		-7.39996	7.82194	6.14124	7.93521		-7.43451	6.50164	6.81092	4.77546		-9.3795	9.54585	7.39306	6.87771		-7.83447	7.05205	6.05417	9.48266		-8.9994	5.85657	10.4935	7.58538
16	-9.29156	6.93883	7.15677	7.32248		-7.07208	7.61075	8.929	9.67965		-9.51167	8.54179	7.40908	6.60287		-9.47792	6.84748	8.6894	8.57288		-6.68606	8.89058	10.2383	10.0587		-5.56832	8.451	6.19456	8.16636		-5.78034	6.40386	6.80522	4.76829		-7.99563	9.76049	7.69178	7.22185		-6.12292	6.92195	6.20171	9.52949		-7.43373	6.35995	10.5906	7.35972
18	-7.86447	7.61266	7.51062	8.15058		-5.52446	9.16173	8.82917	9.84064		-8.15728	9.59978	8.00625	6.59029		-8.21473	6.98434	9.22331	9.09782		-5.07923	9.48349	10.4402	10.3523		-3.73668	8.53322	6.56559	8.58663		-4.12616	5.95306	7.01816	4.73648		-6.61176	10.6243	7.93145	8.31343		-4.41137	8.31327	6.1845	9.84598		-5.86806	6.27024	11.5447	8.39151
20	-6.43738	7.77737	7.93849	8.44831		-3.97684	9.46216	8.84015	9.90305		-6.80288	10.0471	8.25955	6.45981		-6.95153	7.2895	9.19139	9.40239		-3.47239	9.94914	10.8355	10.688		-1.90504	8.57659	6.48794	8.93102		-2.47199	5.94409	7.54661	4.75759		-5.22789	10.7679	7.85297	8.64772		-2.69983	8.49265	6.31588	9.81035		-4.30239	6.84214	12.1341	9.9311
22	-5.01029	8.03372	8.55279	8.82484		-2.42921	9.61016	9.24039	10.2877		-5.44849	10.4655	8.95085	6.49185		-5.68834	7.55496	9.41201	9.37356		-1.86555	10.1119	11.0573	10.9725		-0.0734066	9.12664	6.6592	8.93392		-0.817813	6.27596	7.70972	5.03795		-3.84403	10.8535	7.76267	8.68017		-0.988278	8.92568	6.34186	9.94602		-2.73672	7.70698	11.3538	9.19176
24	-3.58319	8.40252	9.11149	9.25731		-0.881586	9.98586	9.77339	10.5676		-4.09409	10.5001	9.41653	6.8222		-4.42515	7.85616	9.74651	9.74718		-0.258716	10.365	11.278	11.1274		1.75823	9.30333	7.1913	9.29735		0.836362	6.79223	8.09007	5.80063		-2.46016	10.8488	7.76716	8.77231		0.72327	9.55284	6.34063	10.3415		-1.17105	9.76848	11.8461	9.71674
26	-2.1561	8.83784	9.52731	9.35362		0.666039	10.4202	10.306	10.6085		-2.7397	10.9089	9.069	7.38459		-3.16195	8.20603	10.5614	10.4307		1.34812	10.4726	11.3624	11.317		3.58987	9.49988	7.47155	9.43533		2.49054	7.31144	7.65247	6.11381		-1.07629	10.8628	7.90649	8.99398		2.43482	9.85521	6.67371	10.6093		0.394618	10.8458	12.1788	9.50309
28	-0.729009	9.25271	9.84168	9.8761		2.21366	10.5233	9.88586	10.3359		-1.3853	11.0908	7.49097	8.41592		-1.89876	8.43486	11.3502	11.2753		2.95496	10.3393	11.282	11.563		5.42151	8.70037	7.90346	8.91625		4.14471	7.61117	8.08339	6.20122		0.30758	11.0274	8.19096	9.17156		4.14637	10.6316	7.7716	9.94467		1.96029	10.8492	13.0423	9.22114
30	0.698083	9.70905	9.87115	10.3896		3.76129	10.6043	8.42924	10.352		-0.0309098	11.63	7.92047	8.65209		-0.635566	8.77536	11.5322	11.9109		4.56179	11.2832	11.8878	11.7499		7.25314	9.08923	8.0244	8.89127		5.79889	8.92181	8.10725	7.64918		1.69145	11.1992	8.46194	8.17402		5.85791	11.5911	9.89732	10.5405		3.52596	11.3345	13.0246	10.0773
32	2.12518	10.1505	8.77187	10.7203		5.30891	10.9766	7.88189	10.7384		1.32348	12.1737	8.72616	8.73664		0.627628	9.15516	12.1905	12.2209		6.16863	11.8561	12.2965	11.3162		9.08478	9.61473	8.4874	9.49602		7.45306	10.0661	8.35453	9.92133		3.07532	11.4678	7.75191	7.83089		7.56946	12.0753	10.5539	10.5453		5.09163	11.3568	13.8073	11.6633
34	3.55227	10.4963	9.38582	11.1848		6.85654	10.8714	8.402	11.5777		2.67788	12.4643	9.51413	9.71094		1.89082	9.84393	13.3004	12.8581		7.77547	12.6073	13.1113	12.4548		10.9164	9.94437	9.02243	10.4516		9.10724	10.2072	9.03238	9.48872		4.45919	11.6888	8.17063	10.1942		9.28101	12.6674	11.236	11.51		6.6573	12.0354	13.569	14.3946
36	4.97936	10.7221	10.0982	11.0733		8.40416	11.1085	8.499	12		4.03227	12.0804	9.67581	10.6937		3.15402	10.3488	14.2373	13.6421		9.38231	13.1731	13.3779	12.8952		12.7481	10.2989	9.06414	10.5463		10.7614	10.2239	9.19164	10.59		5.84305	11.5782	9.08498	10.2341		10.9926	12.7092	11.8625	11.7432		8.22297	12.038	14.8835	13.9532
38	6.40645	11.5927	10.3587	12.106		9.95179	11.2718	8.9099	12.3132		5.38667	11.7797	10.9372	11.0355		4.41721	10.6828	15.113	14.4205		10.9891	13.6683	13.642	13.2235		14.5797	10.5335	9.65283	11.0726		12.4156	11.1328	10.1533	11.3286		7.22692	12.5567	10.0162	9.77113		12.7041	13.3739	12.4775	13.0749		9.78864	13.2791	15.0228	14.863
40	7.83354	12.0874	10.8214	12.4742		11.4994	11.6204	9.0229	12.7723		6.74106	12.0721	11.2318	11.5622		5.6804	11.3626	15.741	15.6104		12.596	14.2917	13.7845	13.5574		16.4113	11.0642	10.1449	12.1463		14.0698	11.0332	11.0508	11.3253		8.61079	13.0218	10.2737	9.96227		14.4157	13.3464	14.0059	13.9662		11.3543	14.1326	15.5399	16.5139
42	9.26064	12.446	11.173	12.7626		13.047	11.9278	9.33791	13.285		8.09546	12.6699	11.9371	12.1733		6.9436	12.4208	16.1743	17.2024		14.2028	15.4283	13.9077	13.9955		18.243	11.5652	10.515	12.2691		15.7239	11.1373	11.9342	11.9721		9.99466	13.6017	10.4928	10.4001		16.1272	14.6066	14.3095	14.173		12.92	14.3879	15.4831	17.6869
44	10.6877	12.8885	11.5432	13.0143		14.5947	12.1514	10.3489	13.8548		9.44985	13.3832	12.4894	12.2861		8.20679	13.1365	16.4221	17.8953		15.8097	16.5778	14.224	14.6844		20.0746	12.6551	10.9717	12.5296		17.3781	12.8114	12.9208	13.6024		11.3785	14.1842	10.7192	10.5562		17.8388	14.4139	15.5007	15.0877		14.4856	14.8097	19.1672	17.6436
46	12.1148	13.298	12.1835	13.6415		16.1423	12.3664	10.5055	14.3566		10.8042	14.9268	13.3409	13.5369		9.46998	13.956	17.0269	18.6597		17.4165	17.8063	14.6921	15.3372		21.9062	12.5678	11.8367	13.5493		19.0323	13.6868	13.6388	13.4251		12.7624	14.6015	11.0301	10.9033		19.5503	16.0867	16.5549	15.833		16.0513	16.2091	21.2251	18.2563
48	13.5419	13.7283	12.8474	14.429		17.6899	12.8772	10.5578	14.6903		12.1586	15.5968	13.8616	13.4491		10.7332	15.2173	18.2349	19.9189		19.0233	18.7021	14.8421	15.7844		23.7379	13.009	12.3456	13.4713		20.6865	14.3879	14.595	13.426		14.1463	14.9753	11.2561	11.4165		21.2618	17.2181	17.344	16.6947		17.617	17.2767	21.7874	19.7496
50	14.969	14.4219	13.3275	15.3566		19.2375	13.4817	10.7461	14.6427		13.513	15.832	14.3235	14.034		11.9964	16.6638	19.0343	21.1152		20.6302	20.321	15.9805	16.0738		25.5695	14.4501	13.1342	13.9326		22.3406	15.2132	15.0258	13.9967		15.5301	15.3226	11.614	11.9595		22.9734	17.8199	17.6934	17.7851		19.1827	18.7933	23.3064	21.0716
52	16.3961	15.3777	13.2866	16.1216		20.7852	13.4831	10.9555	15.3046		14.8674	16.6665	14.8848	14.7277		13.2596	18.1272	20.0115	21.9728		22.237	22.0566	17.0016	17.2182		27.4012	14.6398	14.1892	14.2164		23.9948	16.7006	15.6438	14.4001		16.914	15.7275	12.005	12.2907		24.6849	19.0636	19.1405	18.7623		20.7483	20.1744	23.878	21.6118
54	17.8232	16.6532	13.5669	16.3634		22.3328	13.7549	10.8324	16.7516		16.2218	17.9614	15.3011	15.507		14.5228	19.1756	21.2604	22.7694		23.8438	24.0273	17.8619	17.7667		29.2328	15.6179	15.193	16.2131		25.649	16.6121	16.7854	12.9914		18.2979	16.2584	12.377	12.643		26.3965	19.0412	20.9814	19.4453		22.314	22.229	26.3882	22.9802
56	19.2503	17.472	14.1735	17.0072		23.8804	14.4267	11.3712	16.8907		17.5762	18.4319	15.5001	16.5737		15.786	20.7319	22.586	24.5573		25.4507	24.671	18.7522	18.5682		31.0644	15.8549	15.3803	16.776		27.3032	17.022	17.301	14.4102		19.6817	17.0927	12.8807	13.0206		28.108	19.0004	21.1851	19.9032		23.8797	22.2905	27.5867	22.4485
58	20.6774	18.8396	14.7622	17.8252		25.428	15.0978	12.4993	16.768		18.9306	19.4323	17.5556	16.5382		17.0491	22.0129	23.5913	25.49		27.0575	25.9799	19.7786	19.2839		32.8961	17.1773	15.7565	18.3164		28.9573	18.0319	17.9879	14.8801		21.0656	17.7564	14.0417	13.0872		29.8196	21.4127	22.4627	21.4581		25.4453	22.1923	28.7202	22.6569
60	22.1045	19.3799	15.4166	18.1225		26.9757	15.6381	13.2639	17.4887		20.285	20.3314	18.6212	18.1009		18.3123	22.9905	24.0798	26.1701		28.6643	27.5247	21.23	20.3319		34.7277	17.2231	17.1783	18.3902		30.6115	19.1174	19.3112	17.2329		22.4495	18.0455	14.6741	13.5973		31.5311	21.4922	23.3495	22.0707		27.011	23.6894	30.3454	24.578
62	23.5316	20.5289	17.0218	18.4209		28.5233	16.2237	12.7265	18.0832		21.6394	21.6872	19.6469	18.8307		19.5755	24.6103	25.0399	26.6359		30.2712	29.468	22.4919	21.8148		36.5594	17.6868	18.1976	19.2987		32.2657	20.6094	20.3766	16.0272		23.8333	18.5098	15.2525	14.08		33.2427	21.5054	24.2165	21.7019		28.5767	26.8601	30.5485	24.5852
64	24.9587	21.4202	17.5893	18.8067		30.0709	17.3178	12.8034	18.5021		22.9938	22.7701	21.1404	19.2388		20.8387	26.1434	25.9805	27.4015		31.878	31.2848	23.8861	23.5966		38.391	19.2612	18.6025	20.5482		33.9199	21.8242	21.0774	19.3998		25.2172	19.3248	16.0592	14.595		34.9542	22.6632	26.3745	22.6538		30.1424	26.1867	31.5839	25.8013
66	26.3857	21.954	18.2745	19.6103		31.6185	18.4846	13.1083	19.1825		24.3482	23.6513	21.7359	20.2277		22.1019	27.5065	27.0578	29.2516		33.4849	33.1657	25.342	24.3239		40.2226	19.6017	19.4346	20.112		35.574	22.9168	22.1104	19.717		26.6011	20.4312	16.5421	15.2713		36.6658	24.8962	26.5019	24.2968		31.708	25.8555	32.4663	27.45
68	27.8128	23.6909	19.1513	20.9437		33.1662	18.8944	14.271	19.6998		25.7026	24.6131	23.3727	21.4201		23.3651	29.1345	28.0083	30.7703		35.0917	36.0132	26.5509	24.9481		42.0543	21.4652	19.6961	20.997		37.2282	23.4505	23.4645	20.5082		27.985	21.7253	17.0951	15.8348		38.3773	25.9384	27.0672	24.8931		33.2737	29.135	32.7392	29.4349
70	29.2399	24.5161	19.5441	21.4566		34.7138	20.0171	15.4259	20.7986		27.057	25.5475	24.816	22.7311		24.6283	30.5798	29.7467	32.386		36.6985	38.4951	28.8575	26.0131		43.8859	23.6716	22.3365	21.9226		38.8824	25.9415	25.3157	20.8789		29.3688	23.5587	17.5935	16.4222		40.0889	26.1417	28.33	26.8841		34.8394	29.4228	34.6367	27.8105
72	30.667	25.7533	20.7134	21.9863		36.2614	21.9711	17.4188	22.4685		28.4114	26.6221	25.8856	23.0724		25.8915	32.5139	31.5482	34.7907		38.3054	39.6063	30.0847	27.2202		45.7175	24.1428	22.1131	22.0404		40.5366	28.3118	27.22	22.3671		30.7527	25.062	18.2192	17.0689		41.8004	28.4416	29.819	26.2404		36.405	33.1417	38.1316	30.022
74	32.0941	27.2246	21.9093	22.6075		37.809	24.5019	18.4996	23.8381		29.7658	28.5923	27.2364	23.5757		27.1547	34.5293	32.1227	37.3586		39.9122	42.4887	31.4617	28.8421		47.5492	25.9886	24.0206	23.6132		42.1907	30.5531	28.4668	22.1589		32.1366	26.3753	18.9632	17.5581		43.512	28.6477	30.4581	28.8975		37.9707	35.5233	39.1448	31.6627
76	33.5212	28.0615	23.1962	23.7926		39.3567	24.8473	19.5172	26.2027		31.1202	30.8232	29.0405	25.2295		28.4179	35.7482	34.1856	37.99		41.519	44.3669	32.0114	29.805		49.3808	27.409	24.9296	24.8409		43.8449	31.7568	29.9053	21.6872		33.5204	27.4313	19.8864	18.4006		45.2235	30.1443	32.8123	28.2309		39.5364	35.7719	39.2934	31.92
78	34.9483	28.8544	24.4551	24.1196		40.9043	25.3623	20.4829	27.5938		32.4746	32.4033	29.6449	26.4894		29.6811	37.4883	35.8711	39.4355		43.1259	47.2881	33.269	31.245		51.2125	26.5648	26.2347	24.5748		45.4991	32.3616	31.2065	22.758		34.9043	28.6087	20.9326	19.1814		46.9351	30.1253	33.8892	30.772		41.102	38.6878	41.3876	34.2416
80	36.3754	30.0093	25.7509	24.5791		42.4519	27.498	20.4761	28.0355		33.829	34.7154	32.367	27.6431		30.9443	39.3594	36.5784	41.5438		44.7327	51.2062	34.6826	32.4191		53.0441	27.2782	26.9127	26.8768		47.1533	34.139	33.2361	26.1534		36.2882	29.6263	21.9514	19.9886		48.6466	32.2786	33.749	32.3257		42.6677	38.8994	40.2755	36.837
82	37.8025	31.7831	27.2637	26.3718		43.9995	29.4555	21.6891	27.8957		35.1833	38.5188	32.0367	32.2453		32.2075	41.5434	36.798	44.0375		46.3396	51.5467	36.0731	33.994		54.8757	27.9739	28.9791	27.3899		48.8074	37.0796	34.9532	28.5074		37.672	30.4685	23.018	21.0239		50.3582	32.4251	35.5509	33.7651		44.2334	44.468	45.4521	35.8102
84	39.2296	33.5618	28.4777	27.2243		45.5472	31.0511	23.3988	29.3793		36.5377	41.5367	33.4882	32.5068		33.4707	43.0148	37.6012	45.3598		47.9464	52.0861	37.9471	35.5086		56.7074	29.0223	30.7198	29.7225		50.4616	39.9413	36.7424	28.3805		39.0559	31.4338	24.174	22.2242		52.0697	36.7355	39.3837	36.8986		45.7991	44.1041	44.0896	38.3747
86	40.6567	35.5978	29.9505	28.2247		47.0948	33.2591	24.3746	30.3173		37.8921	41.9075	36.1833	33.637		34.7339	45.7312	38.9317	45.7502		49.5532	56.7774	41.9007	36.9045		58.539	31.9757	31.6435	30.127		52.1158	41.0486	39.1927	33.4953		40.4398	32.2025	25.3961	23.1628		53.7813	38.9082	40.3895	36.6511		47.3647	46.2175	49.2938	39.3051
88	42.0838	37.2255	31.5003	29.8889		48.6424	34.7136	26.2011	32.3612		39.2465	46.8781	38.5807	35.6352		35.9971	49.1662	43.7778	46.8874		51.1601	60.2469	44.3556	38.1159		60.3706	32.511	32.5539	30.9406		53.77	43.0463	40.1797	34.2812		41.8236	32.9246	26.6678	24.1865		55.4928	39.2742	42.8179	39.4331		48.9304	50.8176	49.0972	41.4153
90	43.5109	38.5846	33.428	31.4445		50.19	36.6669	27.6845	35.0294		40.6009	49.7841	41.9409	36.6056		37.2602	51.7851	47.117	49.0837		52.7669	60.0526	44.9137	39.81		62.2023	34.8114	35.8986	31.8537		55.4241	44.4675	41.2407	34.3419		43.2075	33.6604	27.902	25.3516		57.2044	46.1585	43.3355	44.122		50.4961	51.6929	50.6265	47.462
92	44.9379	39.823	34.8628	33.0855		51.7377	39.5067	29.7066	37.3236		41.9553	52.4312	45.7126	38.9902		38.5234	53.5071	48.6115	50.6814		54.3737	61.1248	47.4292	42.3098		64.0339	33.4139	36.6985	35.5746		57.0783	46.8915	44.2176	38.6591		44.5914	34.5541	29.351	26.3466		58.9159	48.0455	48.5259	44.6877		52.0617	55.1331	54.8815	48.8919
94	46.365	41.2138	36.5037	34.7311		53.2853	44.9282	32.096	38.4344		43.3097	56.1938	49.1708	41.3499		39.7866	54.9291	49.9219	52.5346		55.9806	62.071	48.4824	43.8184		65.8656	35.4336	35.7622	34.9511		58.7325	49.1143	48.5798	43.2368		45.9752	35.7092	30.8854	27.7176		60.6275	50.6909	52.3997	48.5241		53.6274	58.6983	57.5842	52.6547
96	47.7921	42.3094	38.0225	36.0554		54.8329	49.3334	33.0575	40.0503		44.6641	59.732	50.2289	44.9273		41.0498	56.3632	52.2974	52.9093		57.5874	62.3721	46.0199	45.1309		67.6972	35.0087	36.9278	36.2284		60.3867	50.6038	50.741	39.6435		47.3591	37.472	32.8028	28.9861		62.339	51.0869	55.2094	52.1925		55.1931	58.8312	59.198	53.0886
98	49.2192	43.8039	40.2433	37.6903		56.3805	51.1658	35.2563	43.1725		46.0185	62.0066	54.6242	46.4643		42.313	57.6191	53.4957	52.6151		59.1942	64.5169	46.4362	45.8451		69.5288	34.8212	41.6725	38.2093		62.0408	53.1251	52.9875	41.4673		48.743	39.0949	34.3782	30.6565		64.0505	53.8865	54.2033	56.3161		56.7587	64.5064	65.1459	55.2093
100	50.6463	44.1347	41.5891	38.4223		57.9282	52.096	38.5625	47.2345		47.3729	63.728	56.1392	47.5618		43.5762	58.8782	55.004	53.1784		60.8011	58.8996	48.3595	46.553		71.3605	34.6951	42.5182	38.5849		63.695	56.3075	59.0039	49.0247		50.1269	39.2889	35.9386	32.3356		65.7621	57.0397	54.8386	54.9841		58.3244	64.7863	68.3586	60.26

## Sheet: BF-lh_reliability
BF-lh	s1					s2					s3					s4					s6					s7					s8					s9					s10					s11
knee ROM(%)	knee ROM (°)	trial 1 (shear modulus, kPa)	trial 2 (shear modulus, kPa)	trial 3 (shear modulus, kPa)		knee ROM (°)	trial 1 (shear modulus, kPa)	trial 2 (shear modulus, kPa)	trial 3 (shear modulus, kPa)		knee ROM (°)	trial 1 (shear modulus, kPa)	trial 2 (shear modulus, kPa)	trial 3 (shear modulus, kPa)		knee ROM (°)	trial 1 (shear modulus, kPa)	trial 2 (shear modulus, kPa)	trial 3 (shear modulus, kPa)		knee ROM (°)	trial 1 (shear modulus, kPa)	trial 2 (shear modulus, kPa)	trial 3 (shear modulus, kPa)		knee ROM (°)	trial 1 (shear modulus, kPa)	trial 2 (shear modulus, kPa)	trial 3 (shear modulus, kPa)		knee ROM (°)	trial 1 (shear modulus, kPa)	trial 2 (shear modulus, kPa)	trial 3 (shear modulus, kPa)		knee ROM (°)	trial 1 (shear modulus, kPa)	trial 2 (shear modulus, kPa)	trial 3 (shear modulus, kPa)		knee ROM (°)	trial 1 (shear modulus, kPa)	trial 2 (shear modulus, kPa)	trial 3 (shear modulus, kPa)		knee ROM (°)	trial 1 (shear modulus, kPa)	trial 2 (shear modulus, kPa)	trial 3 (shear modulus, kPa)
0	-20.7083	8.85911	7.6403	7.59215		-19.4531	6.13915	6.64051	6.14517		-20.3468	7.28306	6.10637	6.41048		-19.5835	10.281	7.66988	8.06783		-19.5408	12.8908	11.8134	10.5085		-20.2214	5.25378	4.35985	6.34001		-19.0137	4.52175	6.20159	5.55444		-19.0666	10.0493	8.4614	7.57986		-19.8153	11.095	10.4894	12.0247		-19.9591	9.32792	9.21354	8.30769
2	-19.2812	9.32803	7.83151	7.82085		-17.9055	6.49959	6.71982	5.75494		-18.9924	7.86911	6.13035	6.6435		-18.3203	10.3794	7.71023	8.27884		-17.9339	12.9532	11.9722	10.5258		-18.3898	6.17534	5.18309	6.60867		-17.3596	4.20407	4.2744	5.479		-17.6827	10.2053	8.91752	7.75778		-18.1038	11.6161	10.6668	11.9922		-18.3934	8.96268	9.51178	8.01176
4	-17.8541	9.57829	8.00514	8.16136		-16.3578	6.75305	6.96371	6.26822		-17.638	8.44643	6.49421	6.91437		-17.0571	10.8107	7.77502	8.69562		-16.3271	13.0218	11.7979	10.8142		-16.5581	6.25378	5.10774	6.67569		-15.7054	3.81072	4.70782	5.48822		-16.2988	10.2422	9.3448	7.91596		-16.3922	12.8675	11.6586	12.5016		-16.8278	9.71699	10.5484	8.08612
6	-16.427	9.80148	8.38673	8.35143		-14.8102	6.66299	7.2407	6.91564		-16.2836	8.83918	6.76249	7.37149		-15.7939	10.7475	7.88482	8.58234		-14.7202	13.0444	11.9502	10.9114		-14.7265	6.89217	5.87341	6.23247		-14.0512	4.2556	4.86309	6.29733		-14.915	10.3911	9.45087	7.96398		-14.6807	12.6135	11.7561	12.6083		-15.2621	10.6941	10.5152	9.48854
8	-14.9999	9.96534	8.58181	8.5773		-13.2626	6.55074	7.75341	7.18416		-14.9292	9.22058	6.69129	7.68118		-14.5307	10.6597	7.90062	8.34855		-13.1134	13.3687	12.2757	10.9859		-12.8949	7.1502	5.80313	6.39837		-12.397	4.29598	3.95684	7.09902		-13.5311	10.5522	9.58749	8.01352		-12.9691	12.4812	11.7503	12.8039		-13.6964	11.7945	11.2636	10.3144
10	-13.5728	10.095	8.81177	8.64007		-11.715	6.49742	8.28309	7.4211		-13.5749	9.25602	6.59184	7.83553		-13.2675	10.6677	7.91054	8.28612		-11.5066	13.8926	12.1418	10.9606		-11.0632	7.17893	5.30166	6.47813		-10.7429	5.14231	4.43671	5.68724		-12.1472	10.6078	9.44118	8.10761		-11.2576	12.6924	11.6342	12.4095		-12.1307	12.1189	9.94618	11.2302
12	-12.1457	10.3087	9.09086	8.74871		-10.1673	6.69468	8.57315	7.66311		-12.2205	9.34371	6.52945	8.23586		-12.0043	10.745	7.9531	8.28166		-9.89974	14.2724	12.0343	11.4003		-9.2316	8.02421	4.7312	6.54293		-9.08869	4.62409	4.07778	5.93548		-10.7634	10.7447	9.3333	8.17215		-9.54602	13.0551	12.584	13.0438		-10.5651	11.8821	11.8862	10.3736
14	-10.7187	10.5598	9.0733	8.99426		-8.61971	6.7115	8.93503	7.84951		-10.8661	9.32347	6.4712	8.60808		-10.7411	10.7971	7.80115	8.30028		-8.2929	14.6876	12.8415	12.4657		-7.39996	8.85517	6.00663	7.37236		-7.43451	5.07998	5.30191	4.43127		-9.3795	11.0967	9.2634	8.29189		-7.83447	14.4532	14.012	14.0519		-8.9994	11.8219	11.6105	11.1908
16	-9.29156	10.7396	9.36625	9.69837		-7.07208	6.32699	9.27639	8.1916		-9.51167	9.9647	6.75753	9.15677		-9.47792	11.1044	7.94075	8.30576		-6.68606	14.8823	12.9622	12.6183		-5.56832	8.43792	7.14022	7.80587		-5.78034	4.63027	5.04042	3.67519		-7.99563	12.0056	9.71715	9.99629		-6.12292	14.5167	14.4777	14.461		-7.43373	12.6838	12.282	12.1405
18	-7.86447	10.8266	9.28384	9.73838		-5.52446	6.23241	9.49283	8.29325		-8.15728	10.9407	6.65773	9.72656		-8.21473	12.1173	8.28634	8.37744		-5.07923	15.3401	13.2985	12.7418		-3.73668	9.14926	8.16426	8.6715		-4.12616	4.55738	5.05721	3.30914		-6.61176	12.1997	10.7666	10.5476		-4.41137	15.3942	14.7454	14.403		-5.86806	12.1472	12.0824	12.8557
20	-6.43738	11.1322	9.8701	10.668		-3.97684	6.82978	9.5909	8.5023		-6.80288	11.3432	6.32896	9.97977		-6.95153	12.9535	9.8334	9.20852		-3.47239	15.8015	13.76	13.1448		-1.90504	9.88067	8.55547	9.43939		-2.47199	4.7512	5.11053	3.60067		-5.22789	12.4774	11.0159	10.613		-2.69983	15.7176	14.4507	14.6783		-4.30239	12.6498	12.3934	12.6677
22	-5.01029	11.4098	10.1026	10.9256		-2.42921	7.30428	9.9211	8.87103		-5.44849	11.5956	6.23405	10.2067		-5.68834	12.8607	10.7278	8.95163		-1.86555	16.2126	14.0399	13.5411		-0.0734066	10.2932	8.77525	9.10024		-0.817813	4.97909	5.43533	5.11223		-3.84403	12.6041	11.192	10.7673		-0.988278	16.7584	15.2858	15.1918		-2.73672	12.7862	12.9732	13.061
24	-3.58319	11.681	10.3973	11.0762		-0.881586	7.78074	9.98131	9.37627		-4.09409	11.5643	6.65881	10.3456		-4.42515	13.1294	11.0303	9.20129		-0.258716	16.6244	14.3455	13.8311		1.75823	9.50395	9.5183	9.42826		0.836362	5.29213	5.56695	5.62306		-2.46016	12.9545	11.4431	10.9027		0.72327	16.9443	16.4211	15.1912		-1.17105	12.8594	12.6819	12.9226
26	-2.1561	11.8262	10.7996	11.1455		0.666039	8.67082	9.80169	9.40034		-2.7397	11.8187	7.17604	10.3398		-3.16195	13.7479	11.2566	9.73206		1.34812	17.4911	14.9338	14.5612		3.58987	10.511	11.0507	9.85949		2.49054	5.48636	6.07411	6.66299		-1.07629	13.0737	11.7657	11.1639		2.43482	16.6056	16.7032	15.7529		0.394618	12.7483	12.4936	14.6299
28	-0.729009	12.21	10.9676	11.3506		2.21366	9.81031	10.1481	9.55321		-1.3853	12.1573	7.48481	10.8417		-1.89876	13.8281	11.4654	10.3436		2.95496	18.1902	15.2644	15.169		5.42151	10.5475	9.71579	9.78053		4.14471	5.65727	6.58654	8.12318		0.30758	13.5686	12.0115	11.35		4.14637	18.0646	16.3643	15.3819		1.96029	13.1493	13.091	14.5878
30	0.698083	13.1447	11.5369	11.5948		3.76129	10.0934	10.5588	9.67606		-0.0309098	12.2222	8.06178	11.326		-0.635566	14.072	11.7872	10.591		4.56179	18.8257	15.6792	15.9028		7.25314	10.1143	10.5509	10.746		5.79889	6.77464	8.48321	8.85461		1.69145	13.9629	12.1499	11.4516		5.85791	18.4635	16.5452	16.3302		3.52596	13.9578	13.0226	13.9149
32	2.12518	13.8527	11.8577	12.083		5.30891	11.3374	10.6092	10.2367		1.32348	12.5449	8.99946	11.6402		0.627628	14.2736	12.0759	10.9747		6.16863	19.788	16.0979	15.9646		9.08478	10.835	11.2359	11.2084		7.45306	7.45017	10.0154	10.8897		3.07532	14.2548	12.3711	11.6626		7.56946	18.5329	17.2663	16.4951		5.09163	14.3881	14.0611	13.0925
34	3.55227	14.249	12.0639	12.516		6.85654	12.4128	10.8579	10.955		2.67788	12.5024	9.90158	11.8161		1.89082	14.4496	12.4556	11.1191		7.77547	20.4151	16.2889	16.4682		10.9164	9.31948	10.334	11.9754		9.10724	7.93693	10.2394	11.661		4.45919	14.7638	12.5012	11.9584		9.28101	20.9981	19.5372	17.1395		6.6573	13.679	14.2555	14.221
36	4.97936	14.6651	12.8544	12.994		8.40416	12.1688	11.3051	11.2456		4.03227	12.2846	10.0935	11.5669		3.15402	14.5764	12.6637	11.4049		9.38231	21.1869	16.9969	17.1832		12.7481	10.2047	9.99709	12.3571		10.7614	8.49209	11.5782	10.2131		5.84305	14.6601	12.257	11.9236		10.9926	18.9596	19.8114	17.3242		8.22297	13.6239	14.9979	14.2503
38	6.40645	15.1206	13.4013	13.4325		9.95179	12.3461	11.5788	11.4801		5.38667	12.7058	11.1132	12.1442		4.41721	14.9973	12.8405	11.9543		10.9891	22.1343	17.8199	17.8453		14.5797	10.1034	10.0699	11.8382		12.4156	8.71987	10.6168	11.2667		7.22692	14.7321	12.5846	12.887		12.7041	20.4916	20.5527	17.9735		9.78864	13.5882	14.308	15.6524
40	7.83354	15.7208	13.6051	14.5224		11.4994	12.1112	11.9165	11.7705		6.74106	13.4678	12.4349	12.4115		5.6804	15.0271	12.883	12.3915		12.596	22.5768	18.5238	19.0863		16.4113	11.0553	10.2659	12.7814		14.0698	9.47822	10.6553	12.7235		8.61079	14.8977	12.7894	13.0976		14.4157	20.6575	21.3698	18.2948		11.3543	14.3187	16.3735	17.2611
42	9.26064	16.6117	13.8953	15.363		13.047	12.0536	11.8565	11.9803		8.09546	13.9503	12.2959	12.7033		6.9436	16.6971	12.3504	13.0639		14.2028	23.5283	19.3767	19.6635		18.243	13.152	11.835	12.35		15.7239	10.1763	10.8942	13.1436		9.99466	15.2564	13.0812	13.1872		16.1272	21.4556	22.6158	19.9519		12.92	16.289	16.6123	16.5355
44	10.6877	17.2449	14.3312	15.922		14.5947	12.3396	12.1564	11.8574		9.44985	14.143	12.2728	12.8256		8.20679	17.195	12.6812	14.193		15.8097	24.5172	20.3244	20.6592		20.0746	13.1638	11.3585	12.6467		17.3781	11.167	12.3514	12.9562		11.3785	15.7003	13.6027	13.4607		17.8388	21.5359	23.5731	19.8304		14.4856	15.986	16.7667	15.4867
46	12.1148	18.1917	14.7749	16.5232		16.1423	12.5495	12.7813	12.2238		10.8042	14.1258	12.1809	12.9819		9.46998	17.5067	13.8879	14.6513		17.4165	25.7595	20.9106	21.559		21.9062	14.279	13.1539	14.9532		19.0323	11.1595	13.9671	13.8329		12.7624	16.2371	14.1573	13.8981		19.5503	23.9577	25.6062	20.6378		16.0513	15.6096	18.8413	15.6124
48	13.5419	19.0217	15.404	17.1213		17.6899	12.4959	13.3794	12.5836		12.1586	14.3537	12.133	13.4957		10.7332	18.1275	14.594	15.0818		19.0233	26.2033	21.2933	22.0059		23.7379	14.816	12.8019	15.0879		20.6865	12.307	15.1841	14.0397		14.1463	16.9598	14.6831	14.3103		21.2618	24.7647	27.5337	22.4157		17.617	17.661	17.348	15.3528
50	14.969	19.5936	16.2076	17.91		19.2375	12.085	14.2605	12.7182		13.513	14.8238	12.0452	13.8154		11.9964	18.2767	15.1335	15.625		20.6302	27.537	22.9343	22.8964		25.5695	16.3273	13.7741	14.3115		22.3406	13.5199	15.6257	14.7574		15.5301	17.4329	15.3514	14.7848		22.9734	25.6949	28.8005	22.4898		19.1827	18.3543	20.0793	16.9051
52	16.3961	20.5391	16.6301	18.9104		20.7852	13.0982	14.846	13.6692		14.8674	15.0731	12.3368	14.5237		13.2596	18.9423	15.3661	16.2511		22.237	28.8262	23.8161	23.1086		27.4012	14.1808	14.6431	15.0455		23.9948	13.741	15.9667	15.3948		16.914	17.8531	15.7948	15.4651		24.6849	26.4189	29.5158	23.5466		20.7483	19.8381	20.5772	19.5999
54	17.8232	20.5826	16.7678	19.8742		22.3328	13.5423	15.3719	13.8434		16.2218	15.3731	12.5625	15.0424		14.5228	19.8042	15.9856	16.7287		23.8438	29.9404	24.5599	23.783		29.2328	15.8578	14.6504	16.6056		25.649	14.8409	17.1351	15.4373		18.2979	18.4532	16.0686	15.8521		26.3965	27.8768	30.2859	24.734		22.314	20.7686	21.6279	20.7755
56	19.2503	21.5421	17.4025	21.0633		23.8804	14.2602	15.7158	14.1729		17.5762	15.5262	12.5031	15.4093		15.786	20.5542	16.7589	17.2896		25.4507	30.6887	25.8879	24.8681		31.0644	15.825	14.0188	16.5546		27.3032	15.3876	17.4525	16.3162		19.6817	19.3089	16.2925	16.8985		28.108	27.801	31.6132	26.0039		23.8797	23.4795	22.0826	21.0587
58	20.6774	22.5263	17.9206	21.9016		25.428	15.511	16.0217	15.132		18.9306	15.4954	12.5212	15.7186		17.0491	21.3882	17.7811	18.1603		27.0575	32.0733	26.8641	26.0057		32.8961	14.9459	15.4915	17.0308		28.9573	17.1018	17.0386	16.4365		21.0656	20.3043	17.0125	17.7646		29.8196	29.091	33.0458	26.6033		25.4453	24.1897	21.8596	22.4933
60	22.1045	23.0863	18.9117	22.6541		26.9757	16.1643	16.9856	15.9224		20.285	16.0769	12.817	16.3162		18.3123	22.8053	18.4859	18.7829		28.6643	33.4631	26.7817	27.066		34.7277	15.304	16.5626	18.2052		30.6115	17.4029	18.3785	18.9323		22.4495	20.9365	17.9279	18.4085		31.5311	30.6413	32.8351	27.6498		27.011	23.6253	22.8838	24.2608
62	23.5316	24.4355	19.6512	23.3591		28.5233	15.8356	17.6009	16.8567		21.6394	16.626	13.3066	16.6393		19.5755	24.0764	18.9748	19.0229		30.2712	34.9753	27.613	28.3876		36.5594	14.9124	16.1348	18.5924		32.2657	18.9212	18.222	19.8987		23.8333	21.2113	18.6473	19.02		33.2427	29.4264	33.3238	28.5374		28.5767	22.7652	26.1549	25.1953
64	24.9587	25.2391	20.6752	24.4394		30.0709	15.9408	18.3312	17.7488		22.9938	17.2484	13.6716	17.214		20.8387	25.7093	19.8181	19.9238		31.878	36.2736	28.4575	29.6068		38.391	14.8765	17.2333	19.1338		33.9199	19.3658	20.0478	17.4749		25.2172	21.975	19.4926	19.957		34.9542	32.2075	32.3856	30.1351		30.1424	25.5107	28.5328	26.6783
66	26.3857	26.1577	21.6912	25.1723		31.6185	16.1928	19.5582	17.5491		24.3482	17.7923	14.4354	17.6277		22.1019	26.1031	21.1394	21.5884		33.4849	37.3182	29.2132	30.2998		40.2226	14.1817	17.3482	20.0778		35.574	21.4102	20.8439	20.3753		26.6011	22.1777	19.9666	20.7601		36.6658	32.622	38.1059	30.6296		31.708	29.2649	31.4198	28.2676
68	27.8128	27.4648	22.8798	26.4162		33.1662	16.5441	20.5688	18.0989		25.7026	18.4067	15.5091	18.1658		23.3651	26.7344	22.4813	21.5712		35.0917	39.1645	30.4648	31.8056		42.0543	14.537	17.4602	20.0255		37.2282	22.2859	21.5782	18.6796		27.985	23.2552	20.3698	21.2891		38.3773	32.9787	37.9447	32.3862		33.2737	29.858	31.7904	31.8925
70	29.2399	28.6021	24.3941	27.4442		34.7138	17.6447	20.7792	19.0155		27.057	19.325	16.1063	19.1133		24.6283	27.7547	23.9931	22.2146		36.6985	40.2896	31.4695	33.175		43.8859	15.4503	16.6204	22.5891		38.8824	25.8271	23.2375	21.493		29.3688	23.8807	20.9665	21.9318		40.0889	34.4244	36.8844	33.6014		34.8394	30.6904	35.7354	29.8382
72	30.667	30.3177	25.6103	28.2921		36.2614	18.0353	21.3003	20.2943		28.4114	20.0739	15.8352	20.3598		25.8915	28.6791	25.4084	23.4264		38.3054	41.3649	31.428	34.4486		45.7175	15.0684	17.1834	22.8214		40.5366	25.9132	22.599	20.8571		30.7527	24.5716	21.86	22.83		41.8004	35.4393	36.7636	34.5376		36.405	29.6076	34.7926	32.2947
74	32.0941	31.9058	26.7244	29.4061		37.809	18.9413	22.507	20.7074		29.7658	20.812	15.9226	20.8763		27.1547	29.9563	26.6228	24.581		39.9122	41.7468	31.6149	34.9221		47.5492	17.2657	17.0625	21.8784		42.1907	24.9795	24.7009	22.553		32.1366	25.5371	22.8022	23.7505		43.512	36.1532	38.3651	35.2362		37.9707	31.3441	37.0729	34.9842
76	33.5212	33.4808	27.5699	30.5062		39.3567	19.5707	24.2125	21.4702		31.1202	21.5082	16.0237	21.4461		28.4179	31.0005	27.0789	25.6632		41.519	42.1147	32.2237	35.2132		49.3808	17.9897	18.2559	27.8606		43.8449	26.9969	25.9193	24.0799		33.5204	26.4968	23.5929	24.6887		45.2235	39.3388	37.5456	36.8543		39.5364	32.1557	39.2275	36.4145
78	34.9483	35.4977	28.5803	31.1507		40.9043	20.8133	24.8929	22.6172		32.4746	22.5945	16.1966	22.2858		29.6811	31.8623	28.1474	26.5954		43.1259	42.3903	33.1958	35.8747		51.2125	17.5531	18.7629	27.1326		45.4991	29.6215	25.4296	25.9894		34.9043	27.2822	24.5531	25.5184		46.9351	39.7941	38.9653	37.8179		41.102	34.0892	39.3713	33.028
80	36.3754	37.0293	29.6604	32.6549		42.4519	21.7908	26.0651	24.0043		33.829	24.4511	17.0201	23.0929		30.9443	33.4036	29.2416	27.0239		44.7327	42.5618	34.2954	36.479		53.0441	18.747	19.3564	28.891		47.1533	29.7171	25.5224	28.5689		36.2882	28.5519	25.393	26.2122		48.6466	40.0556	41.5277	39.9259		42.6677	36.8308	41.0412	37.1521
82	37.8025	39.1784	30.5767	34.563		43.9995	23.1298	27.1286	25.7232		35.1833	26.0485	17.6712	24.3813		32.2075	35.5948	30.739	28.2585		46.3396	43.244	36.1897	37.7619		54.8757	18.3271	18.5672	29.0421		48.8074	33.6069	27.4096	28.0344		37.672	30.1706	26.6021	27.1391		50.3582	42.9578	42.0777	40.6076		44.2334	35.524	42.8783	39.6566
84	39.2296	40.9814	31.4391	35.9621		45.5472	23.67	28.3153	26.43		36.5377	27.1039	18.0385	25.4153		33.4707	37.1554	32.4332	29.8547		47.9464	44.5902	36.6987	38.3483		56.7074	19.834	18.5244	29.5709		50.4616	33.4062	29.6093	30.4148		39.0559	31.8356	28.01	28.2918		52.0697	42.4133	42.5329	41.3521		45.7991	34.4732	40.168	38.428
86	40.6567	42.7762	32.8375	36.6631		47.0948	24.3534	29.4053	27.7428		37.8921	27.5047	18.8595	26.723		34.7339	38.4573	34.0137	30.4938		49.5532	45.6285	36.534	37.6739		58.539	18.0896	19.6109	29.4403		52.1158	34.3851	29.9537	31.3183		40.4398	33.6762	29.7552	29.6861		53.7813	44.8717	45.7315	43.2254		47.3647	37.642	43.4156	42.2065
88	42.0838	44.0027	34.1552	37.7839		48.6424	25.7071	30.4499	28.5442		39.2465	28.3871	19.4467	28.0958		35.9971	40.8411	35.2672	31.2119		51.1601	46.5418	37.2183	37.4024		60.3706	18.7708	21.2092	29.7221		53.77	37.886	31.1117	32.3285		41.8236	35.3506	31.7848	30.5592		55.4928	44.9053	45.2584	43.5717		48.9304	39.0743	47.3696	43.0858
90	43.5109	44.9345	35.5077	38.7639		50.19	27.0993	32.0515	29.986		40.6009	29.4475	20.2553	28.4458		37.2602	42.3099	35.6163	31.2937		52.7669	47.5038	37.1258	38.1412		62.2023	18.4572	20.5873	30.4245		55.4241	39.3914	31.5955	36.8183		43.2075	37.1623	33.7268	31.445		57.2044	46.8476	46.4362	44.9198		50.4961	39.5953	50.042	42.9962
92	44.9379	46.0932	36.9816	39.6527		51.7377	28.2634	33.158	31.574		41.9553	29.9518	21.2456	29.0968		38.5234	43.4294	36.1152	32.0289		54.3737	48.2015	37.4419	38.7		64.0339	18.9866	22.4884	31.2649		57.0783	40.7305	33.6064	38.6321		44.5914	38.5208	35.5052	32.5138		58.9159	45.1583	45.7879	44.6669		52.0617	44.9122	49.1575	44.1028
94	46.365	47.1769	38.3121	40.6917		53.2853	29.1627	34.7731	32.8208		43.3097	30.0647	22.35	30.0677		39.7866	43.9192	37.5696	33.6999		55.9806	47.9858	38.3411	38.3738		65.8656	19.2139	22.2868	31.3656		58.7325	41.6814	35.9544	42.9282		45.9752	39.9896	37.212	33.6313		60.6275	46.9265	43.6727	46.1957		53.6274	44.638	52.1688	47.2658
96	47.7921	48.1805	39.2557	42.3723		54.8329	30.6149	35.2124	33.7861		44.6641	30.5668	23.4506	30.9768		41.0498	45.788	38.8179	34.7876		57.5874	48.1591	37.9766	38.4554		67.6972	19.9432	22.768	31.657		60.3867	43.4601	38.0829	43.5887		47.3591	41.6987	39.3674	35.4021		62.339	46.6929	49.5815	46.6088		55.1931	49.3148	53.3665	45.4709
98	49.2192	49.0613	39.5627	44.1575		56.3805	31.0288	36.6355	34.6911		46.0185	31.4474	23.7278	32.0291		42.313	47.504	39.1823	35.4237		59.1942	48.5628	39.13	38.8578		69.5288	20.7803	22.4143	31.1257		62.0408	46.4259	40.7016	45.8092		48.743	42.6694	41.3233	37.4174		64.0505	49.8011	46.269	47.277		56.7587	53.397	53.2855	47.5193
100	50.6463	49.4078	39.6005	44.6583		57.9282	31.431	38.796	35.9664		47.3729	33.5495	24.3735	32.9192		43.5762	49.1107	39.1249	35.7542		60.8011	48.4152	39.2713	38.5906		71.3605	20.8323	22.4092	31.0184		63.695	46.0776	44.3116	46.8227		50.1269	43.5686	42.2133	39.5122		65.7621	51.4514	48.7884	47.2897		58.3244	52.5921	53.1035	51.2004

## Sheet: BF-sh_reliability
BF-sh	s1					s2					s3					s4					s6					s7					s8					s9					s10					s11
knee ROM (°)	trial 1 (shear modulus, kPa)	trial 2 (shear modulus, kPa)	trial 3 (shear modulus, kPa)	trial 3		knee ROM (°)	trial 1 (shear modulus, kPa)	trial 2 (shear modulus, kPa)	trial 3 (shear modulus, kPa)		knee ROM (°)	trial 1 (shear modulus, kPa)	trial 2 (shear modulus, kPa)	trial 3 (shear modulus, kPa)		knee ROM (°)	trial 1 (shear modulus, kPa)	trial 2 (shear modulus, kPa)	trial 3 (shear modulus, kPa)		knee ROM (°)	trial 1 (shear modulus, kPa)	trial 2 (shear modulus, kPa)	trial 3 (shear modulus, kPa)		knee ROM (°)	trial 1 (shear modulus, kPa)	trial 2 (shear modulus, kPa)	trial 3 (shear modulus, kPa)		knee ROM (°)	trial 1 (shear modulus, kPa)	trial 2 (shear modulus, kPa)	trial 3 (shear modulus, kPa)		knee ROM (°)	trial 1 (shear modulus, kPa)	trial 2 (shear modulus, kPa)	trial 3 (shear modulus, kPa)		knee ROM (°)	trial 1 (shear modulus, kPa)	trial 2 (shear modulus, kPa)	trial 3 (shear modulus, kPa)		knee ROM (°)	trial 1 (shear modulus, kPa)	trial 2 (shear modulus, kPa)	trial 3 (shear modulus, kPa)
0	-20.7083	8.99248	13.8843	8.00314		-19.4531	9.57004	7.86727	7.19331		-20.3468	4.66282	8.808	13.0904		-19.5835	9.4407	7.13994	6.02742		-19.5408	7.28458	11.0669	9.56601		-20.2214	8.95208	3.61109	7.29846		-19.0137	4.75954	4.101	3.93045		-19.0666	6.15493	5.96754	5.86316		-19.8153	7.77345	10.2152	15.5852		-19.9591	18.1868	11.667	32.9645
2	-19.2812	8.98752	13.4052	8.01708		-17.9055	9.27852	8.78945	6.14563		-18.9924	5.30679	8.41643	14.2651		-18.3203	9.57815	7.06263	6.17157		-17.9339	7.06889	10.768	9.43502		-18.3898	6.39069	3.60152	7.19668		-17.3596	5.23696	3.70492	4.94535		-17.6827	6.23731	6.22682	5.92147		-18.1038	6.54448	9.31004	15.6442		-18.3934	19.546	16.9267	32.9655
4	-17.8541	8.68351	12.6544	8.0278		-16.3578	9.66191	8.89316	5.11257		-17.638	6.28574	9.16028	15.5843		-17.0571	9.45405	6.87836	5.86311		-16.3271	6.90833	10.5364	9.4476		-16.5581	6.49695	3.74993	5.02719		-15.7054	5.5553	3.05766	5.01605		-16.2988	6.30869	6.41734	5.89865		-16.3922	7.40039	9.14791	17.0714		-16.8278	17.8355	21.7786	33.936
6	-16.427	8.31088	12.524	7.90196		-14.8102	8.9532	7.9454	5.04004		-16.2836	6.71583	9.27973	14.0919		-15.7939	9.61944	6.60406	5.78744		-14.7202	6.95699	9.84571	9.49776		-14.7265	8.77952	4.79159	5.97166		-14.0512	5.19714	3.02805	6.27707		-14.915	6.41263	6.542	5.9432		-14.6807	7.40202	8.44168	9.57035		-15.2621	22.4406	29.8384	32.9547
8	-14.9999	7.77165	12.7624	7.56913		-13.2626	8.14244	7.29914	5.58273		-14.9292	6.8712	9.41787	12.4876		-14.5307	9.34922	6.25366	5.69448		-13.1134	6.7822	9.38144	9.43352		-12.8949	7.13926	5.56721	5.85255		-12.397	5.4248	3.52036	6.35495		-13.5311	6.47404	6.54791	6.08155		-12.9691	6.20494	9.21183	18.1263		-13.6964	25.8561	30.3371	36.6445
10	-13.5728	7.47497	12.5524	7.50903		-11.715	7.40133	6.85255	5.65998		-13.5749	6.71061	10.9125	11.144		-13.2675	8.81278	6.21005	5.53548		-11.5066	6.58108	9.42049	9.44414		-11.0632	5.75009	4.09695	5.43543		-10.7429	5.50723	3.71096	6.62665		-12.1472	6.55828	6.54908	6.17068		-11.2576	6.8467	9.15331	14.5262		-12.1307	19.1293	40.8457	38.4149
12	-12.1457	7.16251	11.3971	7.17104		-10.1673	7.04014	6.5051	5.42953		-12.2205	6.68662	9.9219	10.2874		-12.0043	8.38838	6.29226	5.45777		-9.89974	6.3002	9.23842	10.0675		-9.2316	4.55098	4.0386	5.47026		-9.08869	5.89897	3.66947	7.29052		-10.7634	6.55894	6.54908	6.16441		-9.54602	8.52316	8.13668	13.7829		-10.5651	22.3076	33.2316	41.2335
14	-10.7187	6.87008	10.0755	6.69481		-8.61971	7.20185	5.84253	6.12989		-10.8661	7.07136	9.72972	10.7495		-10.7411	8.72077	6.3123	5.60299		-8.2929	6.62318	9.57683	9.55845		-7.39996	7.25969	5.21655	5.66734		-7.43451	5.10427	3.81808	6.82561		-9.3795	6.55894	6.55141	6.25852		-7.83447	10.2801	9.73622	12.3837		-8.9994	26.748	40.1199	42.0474
16	-9.29156	6.63807	7.98825	6.11643		-7.07208	7.43216	5.36559	6.98856		-9.51167	6.97301	9.91567	10.9867		-9.47792	8.9689	6.47222	5.8803		-6.68606	6.75135	9.49364	9.10243		-5.56832	5.65822	6.31872	6.41599		-5.78034	5.54187	4.16576	6.01798		-7.99563	5.76143	6.92192	5.97565		-6.12292	11.2769	7.60584	12.0974		-7.43373	26.6869	46.4127	47.4248
18	-7.86447	5.93571	7.43419	5.94989		-5.52446	7.58167	6.33244	6.27757		-8.15728	7.0533	10.2903	11.0243		-8.21473	10.1181	6.53611	5.99285		-5.07923	6.4836	9.58544	9.3645		-3.73668	6.01491	6.35326	6.01687		-4.12616	5.23828	4.43127	5.86776		-6.61176	5.25154	7.64784	6.98508		-4.41137	11.5157	9.74849	9.83443		-5.86806	35.7905	55.1006	42.9494
20	-6.43738	5.94619	6.69732	5.43596		-3.97684	7.68223	6.57284	5.7663		-6.80288	7.08526	9.4908	12.8749		-6.95153	10.6041	6.49302	6.626		-3.47239	6.53163	9.20073	9.26536		-1.90504	7.02194	6.73631	6.5112		-2.47199	5.14168	4.86328	5.99218		-5.22789	5.25154	7.61728	7.20219		-2.69983	11.8925	7.93002	11.9301		-4.30239	31.3515	64.487	48.7176
22	-5.01029	5.67068	5.77084	5.3722		-2.42921	8.39123	6.50979	5.5935		-5.44849	7.08841	10.494	10.04		-5.68834	10.3567	6.18573	7.74239		-1.86555	5.81747	8.78248	8.91832		-0.0734066	6.38382	6.64522	8.20449		-0.817813	5.56913	5.18607	6.4733		-3.84403	5.28745	7.78551	7.42728		-0.988278	12.373	7.98488	8.18243		-2.73672	43.4942	63.178	54.4622
24	-3.58319	5.96855	5.1311	5.48572		-0.881586	8.72103	5.98361	6.22597		-4.09409	7.27559	10.6192	11.6924		-4.42515	10.3541	6.06903	8.23303		-0.258716	5.21641	7.99933	8.74618		1.75823	5.95264	7.41703	8.77032		0.836362	5.87759	6.06823	6.68586		-2.46016	5.3981	7.82352	7.92247		0.72327	10.4854	8.36752	10.4365		-1.17105	37.0695	69.1899	51.3223
26	-2.1561	6.57006	4.8908	5.07604		0.666039	7.94712	5.82483	6.88359		-2.7397	7.58048	11.3573	10.9224		-3.16195	9.96043	5.82694	8.24554		1.34812	4.85707	8.11151	8.75593		3.58987	5.11949	7.60259	11.2015		2.49054	6.83295	7.68899	7.18872		-1.07629	6.47776	8.06204	8.34424		2.43482	10.2153	7.60464	8.83753		0.394618	43.6992	68.4141	55.9485
28	-0.729009	6.69317	4.54391	5.22717		2.21366	7.23699	5.77183	6.453		-1.3853	8.30537	11.8252	12.0607		-1.89876	9.07029	5.76046	8.08853		2.95496	5.21517	8.39049	8.50237		5.42151	7.1598	7.69237	11.5703		4.14471	6.98995	7.69174	7.10934		0.30758	6.89664	8.41613	8.53229		4.14637	11.897	8.25719	8.92314		1.96029	46.1219	68.6845	53.7066
30	0.698083	6.65811	4.2126	5.83205		3.76129	6.03115	6.03266	5.48519		-0.0309098	8.03981	12.3473	12.3106		-0.635566	8.54256	5.85213	7.87751		4.56179	5.62848	8.01685	8.39572		7.25314	6.50777	8.78224	13.4602		5.79889	7.67577	7.89791	10.9386		1.69145	7.46778	8.69466	8.64285		5.85791	9.01302	9.57521	8.6598		3.52596	42.1841	62.6765	51.2294
32	2.12518	6.57098	4.10671	6.43221		5.30891	5.74247	6.56334	5.17736		1.32348	9.12969	11.7516	12.0311		0.627628	8.63184	6.23456	7.83438		6.16863	6.10097	7.66542	8.43479		9.08478	7.9886	7.85115	15.8588		7.45306	9.27166	8.9025	9.95034		3.07532	8.07253	8.75272	8.98808		7.56946	8.50881	9.75174	9.01617		5.09163	41.3101	67.5131	56.3725
34	3.55227	6.31083	4.12851	6.96429		6.85654	6.67004	7.60517	5.40769		2.67788	9.78506	11.5243	12.5682		1.89082	9.65209	5.97643	8.22563		7.77547	5.64067	7.30333	8.6626		10.9164	9.12467	10.3972	13.7767		9.10724	9.82928	10.2798	10.5996		4.45919	8.50245	9.18275	9.2752		9.28101	8.23378	9.32263	9.75003		6.6573	43.5396	73.8426	62.4671
36	4.97936	6.15456	3.88585	7.11702		8.40416	7.17978	7.84362	5.01352		4.03227	10.7082	13.513	13.0306		3.15402	10.8002	6.0091	8.5855		9.38231	5.70073	7.13286	7.97237		12.7481	12.5807	11.6209	12.8331		10.7614	9.91509	11.0725	11.2917		5.84305	9.06895	9.30302	8.92278		10.9926	7.23403	8.1102	6.83273		8.22297	45.0263	76.09	61.3792
38	6.40645	6.6935	3.68058	6.96826		9.95179	6.86623	6.53794	4.72714		5.38667	11.0617	14.1517	12.4319		4.41721	11.3032	6.09934	9.55636		10.9891	6.51377	6.89787	7.66808		14.5797	12.037	10.443	12.0981		12.4156	11.1885	11.8725	12.0231		7.22692	9.22366	8.90694	9.76226		12.7041	6.47434	6.4634	9.24087		9.78864	48.8562	73.089	58.2488
40	7.83354	7.45887	3.63363	7.06913		11.4994	6.22168	6.51975	4.19973		6.74106	11.9346	15.107	14.6534		5.6804	10.6293	6.83889	10.4793		12.596	7.0767	7.88543	7.69124		16.4113	10.9456	9.95691	17.6545		14.0698	12.1615	12.2774	12.8424		8.61079	9.60503	9.26513	10.1014		14.4157	5.25167	8.54764	10.5588		11.3543	44.0856	73.1267	57.7362
42	9.26064	7.32969	3.47276	7.25345		13.047	5.49968	6.8696	3.51644		8.09546	12.1853	15.6636	14.1071		6.9436	10.3098	7.17092	11.275		14.2028	6.77245	10.4179	7.79496		18.243	11.4701	10.7186	14.3036		15.7239	13.3866	13.1176	13.2408		9.99466	10.0196	9.60239	10.605		16.1272	4.47074	8.77496	9.58069		12.92	56.1349	76.5886	60.9104
44	10.6877	6.73748	3.22248	7.32446		14.5947	4.44023	6.66878	3.77241		9.44985	12.5548	16.2719	13.9016		8.20679	10.1151	7.72382	11.9974		15.8097	7.52304	12.369	7.75783		20.0746	11.8999	12.5729	15.9506		17.3781	13.535	14.5216	15.1523		11.3785	10.4097	10.1721	10.9125		17.8388	4.85291	7.50056	9.29012		14.4856	54.6942	77.5581	63.7435
46	12.1148	6.12971	3.17918	7.43904		16.1423	3.63259	6.13017	4.72125		10.8042	14.3235	17.0648	15.669		9.46998	10.0639	8.78233	12.2804		17.4165	6.41204	11.2942	6.71674		21.9062	11.308	12.4085	15.5562		19.0323	14.0409	15.122	15.8853		12.7624	10.739	10.5024	11.1624		19.5503	7.91659	6.37625	13.8943		16.0513	56.154	72.3362	64.8007
48	13.5419	5.88188	3.25651	8.00202		17.6899	3.43371	5.83925	4.34181		12.1586	16.3864	18.0508	16.6502		10.7332	11.1723	8.49623	12.5247		19.0233	5.43066	10.4336	7.19927		23.7379	11.1456	14.1039	16.8931		20.6865	14.7853	16.7613	15.7444		14.1463	10.9821	10.7774	11.6307		21.2618	6.88726	7.46518	12.1664		17.617	52.976	69.723	64.8535
50	14.969	5.81655	3.50394	8.87118		19.2375	3.0872	5.81122	3.7582		13.513	17.0652	18.7227	16.8388		11.9964	12.6999	7.94378	12.5533		20.6302	4.47197	10.2304	7.89201		25.5695	12.5905	15.3927	15.3135		22.3406	14.6015	17.9414	17.0729		15.5301	11.5184	11.0573	12.2662		22.9734	7.17885	6.04705	14.6854		19.1827	54.3554	70.4059	67.875
52	16.3961	5.93955	3.68529	8.85248		20.7852	3.51642	5.2899	3.43241		14.8674	18.6302	20.2012	17.6074		13.2596	12.8393	8.17107	13.1818		22.237	3.85179	11.1243	8.39615		27.4012	10.8126	16.2311	18.649		23.9948	17.1896	19.5139	18.3966		16.914	12.1824	11.3852	13.0369		24.6849	9.79262	5.82627	14.5375		20.7483	39.3146	61.7837	70.2988
54	17.8232	5.79498	3.86003	8.78461		22.3328	3.79511	5.40579	3.25769		16.2218	20.1664	21.1712	17.3617		14.5228	12.7886	10.511	13.702		23.8438	3.59343	12.2677	8.82948		29.2328	11.6111	17.8582	18.4039		25.649	17.1984	19.1715	18.9271		18.2979	12.8735	12.153	14.0254		26.3965	9.8279	6.26801	11.1798		22.314	43.7826	48.2225	61.8584
56	19.2503	5.36981	4.25809	8.99473		23.8804	3.73858	5.5892	2.04809		17.5762	23.302	23.0567	18.9964		15.786	12.1003	11.4599	13.6455		25.4507	7.50209	13.3085	9.59143		31.0644	12.3676	18.9453	18.1784		27.3032	18.7504	22.6958	20.2103		19.6817	14.1802	12.8781	14.6903		28.108	7.15286	6.51282	13.0769		23.8797	38.6463	51.9828	61.0436
58	20.6774	5.59164	4.2315	8.45064		25.428	3.64065	5.05055	1.97918		18.9306	24.6685	24.3878	19.9232		17.0491	11.8751	11.1578	12.9614		27.0575	13.8128	15.9463	9.23604		32.8961	13.264	19.9835	23.0621		28.9573	21.3744	24.2492	22.0689		21.0656	15.275	14.3927	15.6342		29.8196	6.29067	6.78835	10.5334		25.4453	33.1929	40.5682	59.0607
60	22.1045	5.6154	4.22405	8.969		26.9757	3.99998	4.66788	2.32225		20.285	26.453	25.8351	21.3651		18.3123	12.7855	11.155	12.7742		28.6643	18.3585	16.9715	9.00925		34.7277	13.8081	20.6031	21.4612		30.6115	21.8759	24.2409	22.4152		22.4495	15.9649	15.6269	16.625		31.5311	5.97781	6.28325	19.7646		27.011	30.1722	40.8477	63.8938
62	23.5316	5.73058	3.862	9.59525		28.5233	4.2264	4.8735	2.41038		21.6394	20.5883	27.9489	21.4105		19.5755	13.3409	11.242	12.4925		30.2712	24.5239	15.0602	9.84375		36.5594	15.6839	21.8325	23.1068		32.2657	22.7565	26.6965	23.9413		23.8333	16.4908	16.4655	17.5144		33.2427	5.66922	5.40777	19.6775		28.5767	32.4533	46.1076	57.9259
64	24.9587	5.85046	3.86575	9.55126		30.0709	4.29009	4.63559	2.60963		22.9938	29.8422	29.9722	23.301		20.8387	13.6098	11.2232	12.818		31.878	31.9625	13.8019	10.2486		38.391	19.0372	23.8737	24.6876		33.9199	24.3064	27.2011	25.8439		25.2172	16.8475	17.4631	18.581		34.9542	6.50538	6.49586	16.0831		30.1424	34.0338	41.3156	61.1595
66	26.3857	6.09423	4.09298	9.08059		31.6185	4.48027	4.76855	3.07964		24.3482	34.6086	31.2803	24.4073		22.1019	13.5785	10.7652	13.87		33.4849	36.6546	13.6308	12.4809		40.2226	20.4799	25.5607	28.5591		35.574	28.4076	29.0539	26.5622		26.6011	17.12	18.5915	19.7902		36.6658	7.55479	7.64072	21.8034		31.708	38.9399	47.2558	59.2302
68	27.8128	6.10164	4.7974	8.69513		33.1662	4.3697	5.36141	2.99418		25.7026	37.1975	33.0682	26.3248		23.3651	13.1811	12.0138	14.426		35.0917	35.6962	15.1955	13.2178		42.0543	21.6769	28.1629	30.4431		37.2282	30.6827	29.9767	28.4774		27.985	17.5203	20.793	20.8745		38.3773	12.245	7.93479	17.0157		33.2737	42.3329	43.5736	51.1855
70	29.2399	6.10667	5.07134	8.22183		34.7138	4.9559	5.33955	3.06975		27.057	33.5007	35.5404	26.787		24.6283	12.9584	13.6401	14.962		36.6985	33.2083	17.8121	13.5893		43.8859	21.5543	29.4055	37.025		38.8824	32.3095	31.8091	29.2082		29.3688	18.1874	21.8494	22.0339		40.0889	11.9856	9.76041	20.3627		34.8394	45.2564	41.6295	42.8593
72	30.667	6.08684	6.21821	7.99433		36.2614	5.38688	6.86267	2.94675		28.4114	35.6508	38.4116	29.3338		25.8915	13.4439	16.8787	15.6312		38.3054	33.9595	18.0894	14.7034		45.7175	25.9931	30.7501	36.5174		40.5366	36.8456	33.0742	32.2134		30.7527	19.3857	22.407	23.204		41.8004	10.6199	9.95619	20.0953		36.405	47.8824	47.1681	38.4429
74	32.0941	5.60622	5.81429	7.82078		37.809	5.14276	7.58326	3.318		29.7658	41.2377	41.0302	32.2712		27.1547	14.5324	19.7001	16.3467		39.9122	40.3049	17.9264	15.766		47.5492	25.1102	36.9083	36.4525		42.1907	38.6838	35.8189	34.8492		32.1366	20.618	23.2239	24.5413		43.512	13.6994	8.32619	25.5489		37.9707	47.4817	45.2593	41.7075
76	33.5212	5.41824	5.44656	7.58537		39.3567	4.77156	9.19102	3.84384		31.1202	43.2226	45.7185	33.564		28.4179	15.3728	17.8099	17.1722		41.519	42.4955	18.2885	24.785		49.3808	27.3896	40.3773	47.0703		43.8449	41.3099	38.6326	40.6608		33.5204	21.6036	24.8823	26.3783		45.2235	19.9844	11.9618	21.2017		39.5364	51.1541	44.6335	38.9056
78	34.9483	6.00975	5.91144	7.36406		40.9043	4.56557	8.5257	4.17545		32.4746	42.7236	46.692	36.526		29.6811	14.8165	17.8196	18.8062		43.1259	46.5439	17.5854	26.394		51.2125	27.542	40.5578	48.9502		45.4991	44.9682	38.4916	43.5798		34.9043	22.7958	26.8075	27.9688		46.9351	19.0212	12.2242	20.7861		41.102	53.3669	42.7642	43.0415
80	36.3754	6.10514	6.25878	7.95252		42.4519	4.81252	10.4049	4.71097		33.829	43.2463	51.0641	37.214		30.9443	13.7272	17.4294	19.5775		44.7327	44.1556	20.3561	35.3157		53.0441	32.9392	45.3091	50.3866		47.1533	41.8321	43.3777	41.9367		36.2882	24.3796	28.6845	29.3803		48.6466	11.1463	11.5348	32.2834		42.6677	57.7545	46.6251	45.464
82	37.8025	6.36014	6.47697	8.34188		43.9995	4.7855	15.2849	4.42505		35.1833	46.8238	54.6069	38.4493		32.2075	13.0343	19.1177	20.2807		46.3396	43.7925	17.147	37.9198		54.8757	36.4228	44.7774	56.8272		48.8074	46.6847	44.0239	51.6016		37.672	25.5376	30.7707	30.8485		50.3582	11.4917	10.3245	27.2991		44.2334	67.423	49.1663	47.4831
84	39.2296	7.07704	6.69973	8.24411		45.5472	3.94964	19.2306	4.74014		36.5377	47.8695	53.4576	40.8558		33.4707	12.0088	24.4796	19.7484		47.9464	48.5553	16.3752	37.7457		56.7074	39.3795	46.9297	53.7865		50.4616	46.5939	47.0545	61.6668		39.0559	25.7247	31.9307	32.165		52.0697	11.9837	10.4443	16.9323		45.7991	73.7096	55.8517	44.4953
86	40.6567	7.32293	6.70742	8.7695		47.0948	3.69816	20.599	4.79172		37.8921	53.4617	53.405	45.3729		34.7339	11.0307	30.2973	20.5089		49.5532	47.7259	16.7482	41.5382		58.539	41.0083	53.8428	54.0689		52.1158	49.5522	55.1341	79.8283		40.4398	25.8524	32.7297	34.2335		53.7813	23.0795	11.8176	17.534		47.3647	76.2219	52.2188	46.343
88	42.0838	7.67187	6.1772	9.74938		48.6424	3.88007	19.1891	6.70313		39.2465	50.2569	59.9789	43.9965		35.9971	11.8993	32.6712	23.6381		51.1601	43.6383	14.1648	38.4243		60.3706	43.3515	54.2431	48.5537		53.77	59.2286	51.9002	80.5561		41.8236	27.1273	33.4157	36.2565		55.4928	26.0258	15.4731	12.9508		48.9304	82.8552	55.0886	46.1456
90	43.5109	7.6816	5.98831	10.3077		50.19	5.65076	19.6239	17.0478		40.6009	51.2778	61.6649	43.0913		37.2602	13.7824	31.6014	28.3475		52.7669	40.2092	14.9386	39.9077		62.2023	48.9006	55.9044	61.6334		55.4241	66.5898	54.6944	87.5978		43.2075	28.5498	34.0492	38.67		57.2044	41.5047	14.9141	13.89		50.4961	86.2063	56.4511	51.5126
92	44.9379	7.91037	5.99405	10.3291		51.7377	8.12118	33.007	19.8099		41.9553	59.5648	65.1801	46.4105		38.5234	14.9589	30.3037	32.8811		54.3737	40.2091	20.0572	47.8511		64.0339	45.7899	53.4833	54.7776		57.0783	71.2988	55.5386	90.208		44.5914	31.5827	35.1389	41.2347		58.9159	53.107	24.8804	16.7866		52.0617	83.7602	63.8994	54.4132
94	46.365	8.14434	6.05483	12.2607		53.2853	11.3159	38.3638	48.0824		43.3097	61.6466	71.1993	53.7853		39.7866	15.4179	30.6294	34.3043		55.9806	40.0428	25.0554	61.3115		65.8656	51.6849	64.1832	58.3104		58.7325	87.9703	57.6998	91.8457		45.9752	35.4774	35.8752	43.9041		60.6275	60.8587	32.8489	18.7453		53.6274	75.1853	58.9947	56.8629
96	47.7921	8.49861	5.78535	13.3841		54.8329	57.5727	45.4454	43.8523		44.6641	65.497	70.5149	56.3377		41.0498	15.2026	33.6527	35.0674		57.5874	41.482	23.9716	58.4448		67.6972	52.5369	63.04	61.9949		60.3867	94.2836	62.4659	86.7738		47.3591	38.1785	36.2558	47.5935		62.339	74.76	26.8856	27.9419		55.1931	78.7712	57.7249	52.1489
98	49.2192	8.7242	5.80018	17.0198		56.3805	43.2879	44.0514	44.4286		46.0185	69.2456	71.7078	54.2362		42.313	15.3334	34.8087	37.3632		59.1942	46.7998	25.5532	61.7604		69.5288	52.1686	63.9068	53.3614		62.0408	103.749	69.3941	85.1947		48.743	40.1259	36.8684	52.2386		64.0505	81.4785	41.9709	18.9614		56.7587	81.5466	82.5957	65.0765
100	50.6463	8.74957	5.70684	18.5953		57.9282	39.6976	38.1212	44.2223		47.3729	69.5644	71.6976	54.8089		43.5762	17.0002	34.7189	40.5084		60.8011	43.3343	27.2237	65.1747		71.3605	56.9113	63.897	53.3329		63.695	97.6726	72.6588	91.2732		50.1269	41.8465	37.4048	56.4778		65.7621	83.5462	50.8616	19.824		58.3244	78.1728	80.812	67.2194
